# Supplementary material for: A NaSO2CF3/NaBrO3-mediated bromotrifluoromethylation of enyne via free-radical cascade processes
Source: Royal Society of Chemistry journal article supplement (doi:10.1039/c8qo00847g), 2018-01-01

## Supporting Information

### **A NaSO<sub>2</sub>CF<sub>3</sub>/NaBrO<sub>3</sub>-Mediated Bromotrifluoromethylation of Enyne via Free-Radical Cascade Processes**

Xiao-Jie Shang<sup>\*a</sup>, Dong Liu<sup>b</sup>, and Zhong-Quan Liu<sup>\* b</sup>

---

<sup>a</sup> College of Resources and Environment, Gansu Agricultural University, Lanzhou 730070, China  
[shangxiaojie@yahoo.cn](mailto:shangxiaojie@yahoo.cn)

<sup>b</sup> State Key Laboratory Cultivation Base for TCM Quality and Efficacy, College of Pharmacy, Nanjing  
University of Chinese Medicine, Nanjing 210023, China [liuzq@njucm.edu.cn](mailto:liuzq@njucm.edu.cn)

|                                                                                     |              |
|-------------------------------------------------------------------------------------|--------------|
| <b>General Information.....</b>                                                     | <b>2</b>     |
| <b>Typical procedure.....</b>                                                       | <b>2</b>     |
| <b>Confirming the configuration of product.....</b>                                 | <b>2-5</b>   |
| <b>Physical data for the products.....</b>                                          | <b>5-14</b>  |
| <b>Copies of the <sup>1</sup>H, <sup>19</sup>F, <sup>13</sup>C NMR spectra.....</b> | <b>15-46</b> |

## General Information

$^1\text{H}$ ,  $^{19}\text{F}$  and  $^{13}\text{C}$  NMR spectra were recorded on a Bruker advance III 400 spectrometer in  $\text{CDCl}_3$  with TMS as internal standard. Mass spectra were determined on a Hewlett Packard 5988A spectrometer by direct inlet at 70 eV. High-resolution mass spectral analysis (HRMS) data were measured on a Bruker Apex II. Element analysis (EA) data were measured on a Vario EL. All products were identified by  $^1\text{H}$ ,  $^{19}\text{F}$  and  $^{13}\text{C}$  NMR, MS, HRMS, and Element Analysis. The starting materials were purchased from Aldrich, Acros Organics, J&K Chemicals or TCI and used without further purification.

## Typical procedure

A mixture of enyne (1 equiv., 0.2 mmol),  $\text{NaSO}_2\text{CF}_3$  (5 equiv., 1.0 mmol),  $\text{NaBrO}_3$  (2.5 equiv., 0.5 mmol) and  $\text{CH}_2\text{Cl}_2/\text{H}_2\text{O}$  (4/1, 10 ml) was heated in a sealed tube at  $110^\circ\text{C}$  (measured temperature of the oil bath) for 24 hours. After the reaction finished, it was abstracted by  $\text{CH}_2\text{Cl}_2$  ( $3 \times 5$  mL). The organic layer was dried with anhydrous  $\text{Na}_2\text{SO}_4$ , the filtrate was evaporated under vacuum and purified by column chromatography to afford the desired product.

## Confirming the configuration of product:

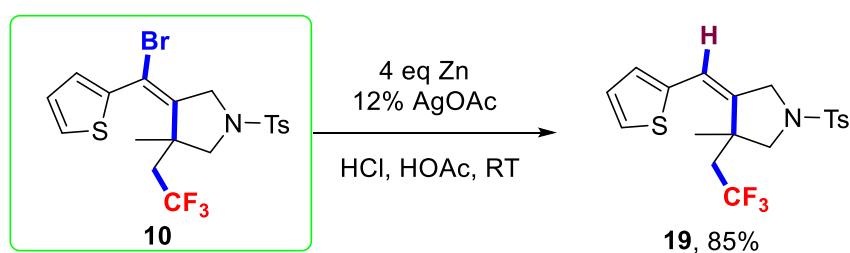

## 19.(*E*)-3-methyl-4-(thiophen-2-ylmethylene)-1-tosyl-3-(2,2,2-trifluoroethyl)pyrrolidine:

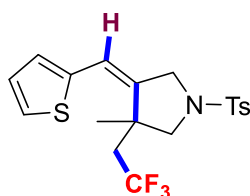

$^1\text{H}$  NMR (400 MHz,  $\text{CDCl}_3$ ):  $\delta$  7.72 (d,  $J = 8.2$  Hz, 2H), 7.37 (d,  $J = 8.0$  Hz, 2H), 7.28 (dd,  $J = 5.1, 1.0$  Hz, 1H), 6.98 (dd,  $J = 5.1, 3.6$  Hz, 1H), 6.84 (d,  $J = 3.5$  Hz, 1H),

6.42 (s, 3H), 4.03 (dd,  $J = 14.1, 2.0$  Hz, 1H), 3.81 (dd,  $J = 14.1, 2.1$  Hz, 1H), 3.21 (s, 2H), 2.60 (dq,  $J = 15.5, 11.4$  Hz, 1H), 2.46 (s, 3H), 2.16 (dq,  $J = 15.5, 11.5$  Hz, 1H), 1.41 (s, 3H).

$^{19}\text{F}$  NMR (376 MHz,  $\text{CDCl}_3$ ):  $\delta$  -60.25 (t,  $J = 11.4$  Hz, 3F), -60.37 (t,  $J = 11.2$  Hz, 0.12F).

$^{13}\text{C}$  NMR (101 MHz,  $\text{CDCl}_3$ ):  $\delta$  144.9, 144.0, 136.9, 131.8, 129.8, 128.0, 127.9, 127.2, 126.2, 123.4 (q,  $J = 278.4$  Hz), 116.4, 60.5 (q,  $J = 2.3$  Hz), 53.8, 42.6, 39.3 (q,  $J = 27.2$  Hz), 23.3, 21.6.

HRMS (ESI,  $m/z$ ): Calculated for  $\text{C}_{19}\text{H}_{21}\text{F}_3\text{N}_1\text{O}_2\text{S}_2$  ( $\text{M}+\text{H}$ ) $^+$  416.0960, found 416.0961.

### 19. $^1\text{H}$ NMR

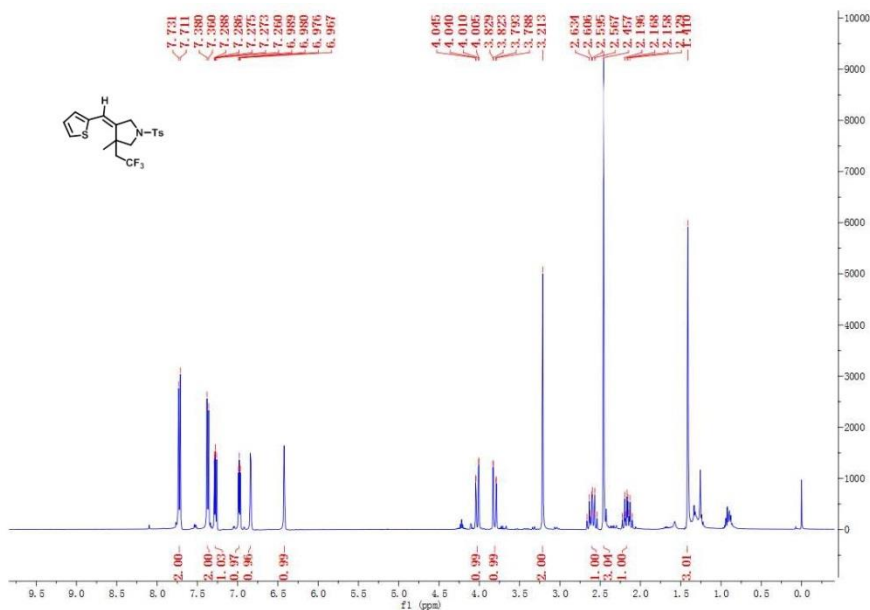

### 19. $^{19}\text{F}$ NMR

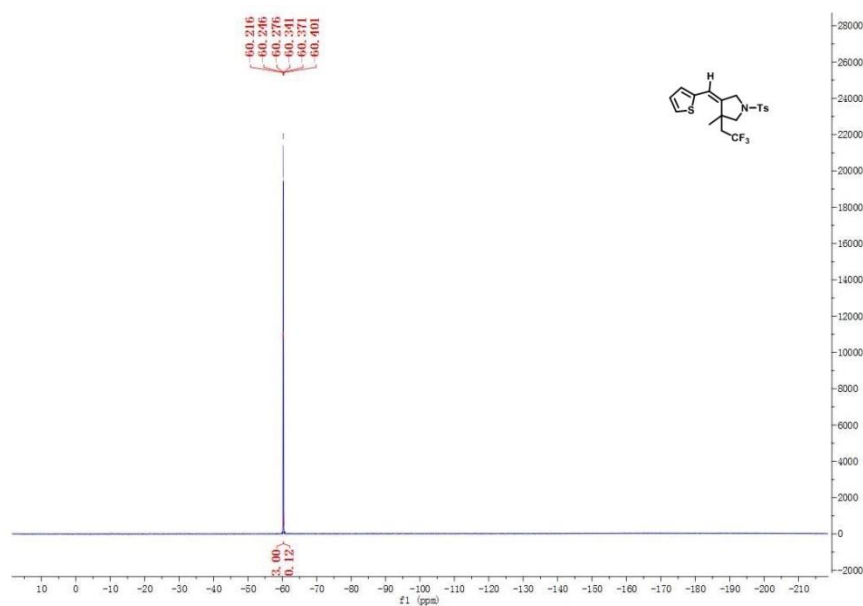

### 19. <sup>13</sup>C NMR

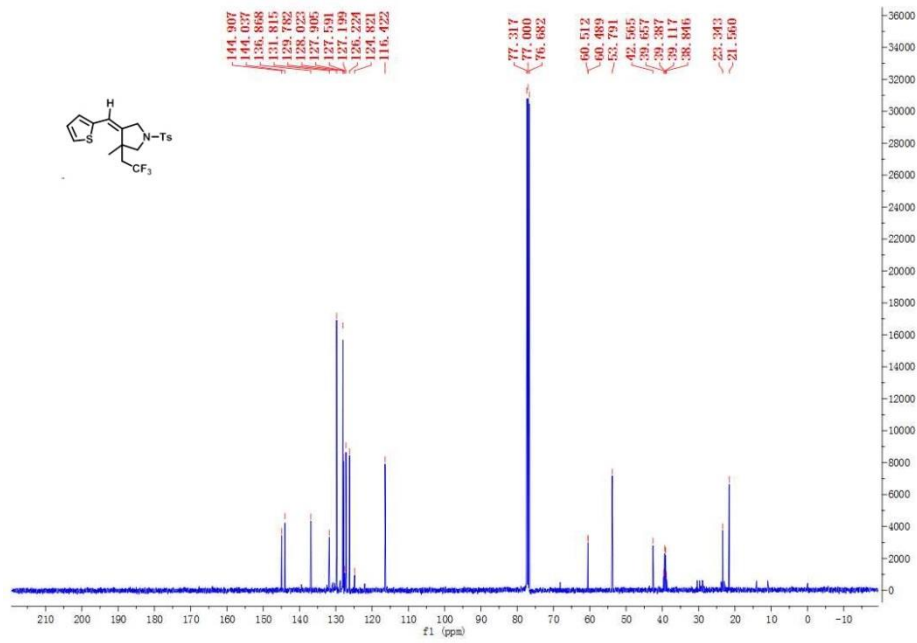

### 19. NOE

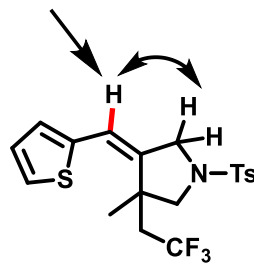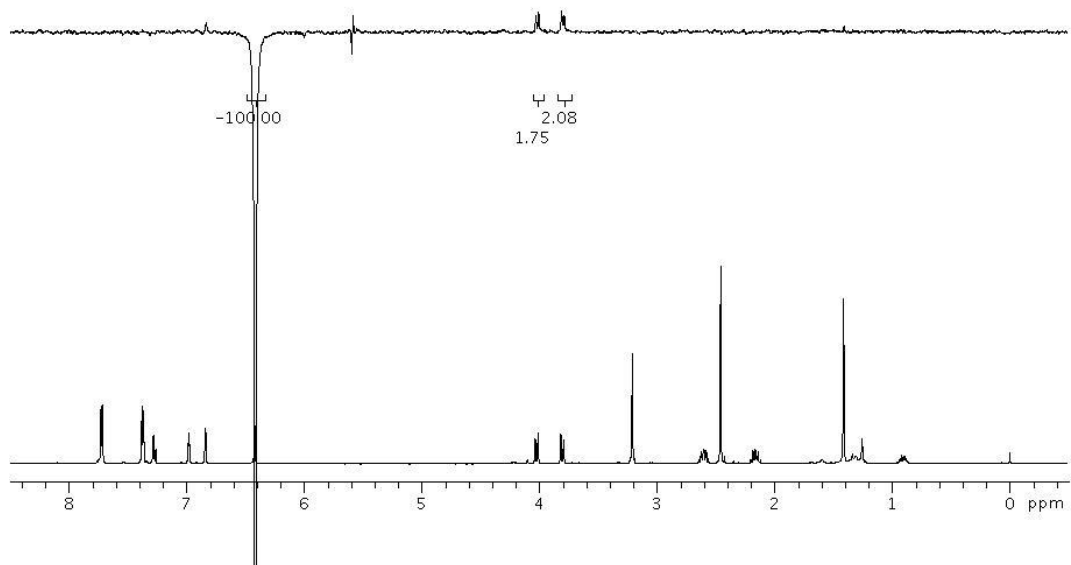

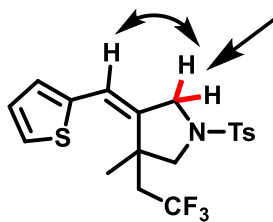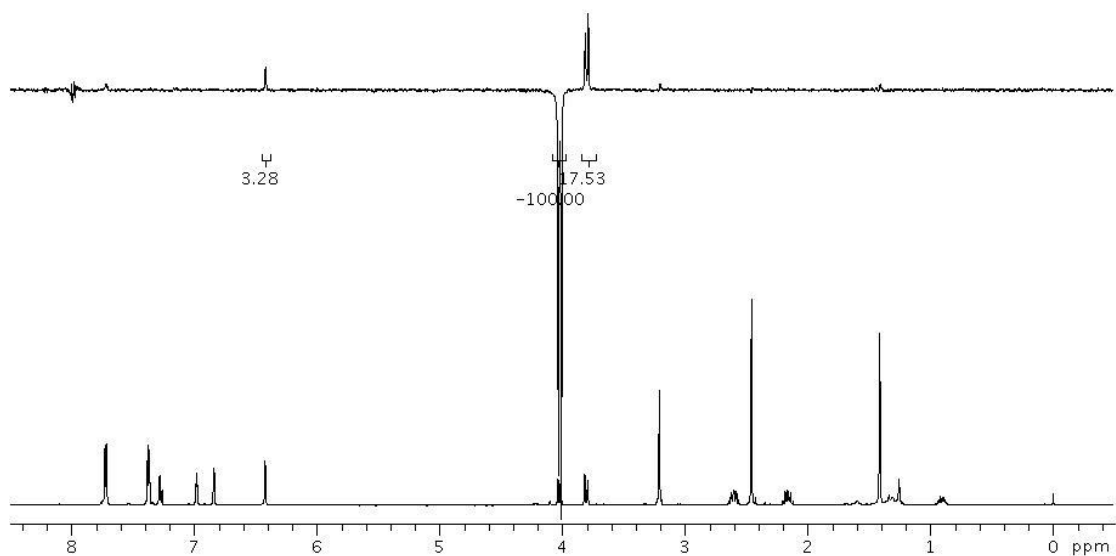

### Physical data for the products:

All known compounds are determined by  $^1\text{H}$  NMR,  $^{13}\text{C}$  NMR and  $^{31}\text{P}$  NMR, MS analysis and compared with which were cited in the following references, and the new compounds were further confirmed by HRMS and/or element analysis.

#### References:

1. L. Zhang, Z. Li and Z.-Q. Liu, *Org. Lett.*, 2014, **16**, 3688.
2. P. Gao, X.-B. Yan, T. Tao, F. Yang, T. He, X.-R. Song, X.-Y. Liu and Y.-M. Liang, *Chem. Eur. J.* 2013, **19**, 14420;
3. Y.-F. Qiu, X.-Y. Zhu, Y.-X. Li, Y.-T. He, F. Yang, J. Wang, H.-L. Hua, L. Zheng, L.-C. Wang, X.-Y. Liu and Y.-M. Liang, *Org. Lett.* 2015, **17**, 3694;
4. Y.-Q. Wang, Y.-T. He, L.-L. Zhang, X.-X. Wu, X.-Y. Liu and Y.-M. Liang, *Org. Lett.* 2015, **17**, 4280;
5. M. Li, C.-T. Wang, Y.-F. Qiu, X.-Y. Zhu, Y.-P. Han, Y. Xia, X.-S. Li and Y.-M. Liang, *Chem. Commun.* 2018, **54**, 5334.

**(1).(*E*)-4-(bromo(phenyl)methylene)-3-methyl-1-tosyl-3-(2,2,2-trifluoroethyl)pyrrolidine**

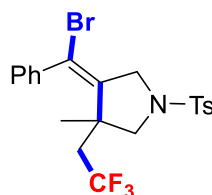

A white solid after purification by flash column chromatography (petroleum ether/ethyl acetate = 10/1, Yield: 70%). **<sup>1</sup>H NMR (400 MHz, CDCl<sub>3</sub>):** δ 7.75 (d, *J* = 8.0 Hz, 2H), 7.40 (d, *J* = 8.0 Hz, 2H), 7.37 – 7.35 (m, 3H), 7.21 – 7.19 (m, 2H), 4.09 (d, *J* = 15.6 Hz, 1H), 3.85 (d, *J* = 15.6 Hz, 1H), 3.24 (s, 2H), 2.47 (s, 3H), 2.07 (dq, *J* = 15.0, 11.2 Hz, 1H), 1.85 (dq, *J* = 15.0, 11.2 Hz, 1H), 1.15 (s, 3H). **<sup>19</sup>F NMR (376 MHz, CDCl<sub>3</sub>):** δ -60.32 (t, *J* = 11.3 Hz, 3F). **<sup>13</sup>C NMR (151 MHz, CDCl<sub>3</sub>):** δ 144.1, 143.0, 138.7, 129.9, 129.3, 128.64, 128.60, 128.0, 125.6 (q, *J* = 278.7 Hz), 60.0, 55.8, 44.2, 40.3 (q, *J* = 27.6 Hz), 24.3, 21.6. **HRMS (ESI, m/z):** Calculated for C<sub>21</sub>H<sub>22</sub>BrF<sub>3</sub>N<sub>1</sub>O<sub>2</sub>S<sub>1</sub> (M+H)<sup>+</sup> 488.0501, found 488.0508.

**(2).(*E*)-4-(bromo(*p*-tolyl)methylene)-3-methyl-1-tosyl-3-(2,2,2-trifluoroethyl)pyrrolidine**

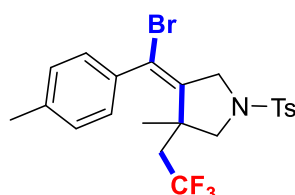

A slight yellow solid after purification by flash column chromatography (petroleum ether/ethyl acetate = 10/1, Yield: 66%). **<sup>1</sup>H NMR (400 MHz, CDCl<sub>3</sub>):** δ 7.75 (d, *J* = 8.2 Hz, 2H), 7.39 (d, *J* = 8.2 Hz, 2H), 7.16 (d, *J* = 7.8 Hz, 2H), 7.09 (d, *J* = 7.8 Hz, 2H), 4.09 (d, *J* = 15.4 Hz, 1H), 3.85 (d, *J* = 15.4 Hz, 1H), 3.25 (s, 2H), 2.47 (s, 3H), 2.35 (s, 3H), 2.08 (dq, *J* = 15.0, 11.2 Hz, 1H), 1.90 (dq, *J* = 15.0, 11.2 Hz, 1H), 1.16 (s, 3H). **<sup>19</sup>F NMR (376 MHz, CDCl<sub>3</sub>):** δ -60.26 (t, *J* = 11.3 Hz, 3F). **<sup>13</sup>C NMR (101 MHz, CDCl<sub>3</sub>):** δ 144.1, 142.8, 139.4, 135.9, 131.8, 129.8, 129.3, 128.5, 128.0, 125.7 (q, *J* = 278.8 Hz), 117.9, 60.0 (d, *J* = 2.2 Hz), 55.8, 44.2 (d, *J* = 1.5 Hz), 40.3 (q, *J* = 27.4 Hz), 24.3, 21.6, 21.3. **HRMS (ESI, m/z):** Calculated for C<sub>22</sub>H<sub>24</sub>BrF<sub>3</sub>N<sub>1</sub>O<sub>2</sub>S<sub>1</sub> (M+H)<sup>+</sup> 502.0658, found 502.0662.

**(3).(*E*)-4-(bromo(*m*-tolyl)methylene)-3-methyl-1-tosyl-3-(2,2,2-trifluoroethyl)pyrrolidine**

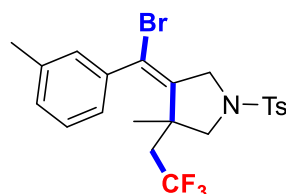

A slight yellow solid after purification by flash column chromatography (petroleum ether/ethyl acetate = 10/1, Yield: 65%). **<sup>1</sup>H NMR (400 MHz, CDCl<sub>3</sub>):** δ 7.75 (d, *J* =

8.0 Hz, 2H), 7.40 (d,  $J = 8.0$  Hz, 2H), 7.23 (d,  $J = 7.6$  Hz, 1H), 7.15 (d,  $J = 7.6$  Hz, 1H), 7.01 – 6.98 (m, 2H), 4.10 (d,  $J = 15.8$  Hz, 1H), 3.85 (d,  $J = 15.8$  Hz, 1H), 3.24 (s, 2H), 2.47 (s, 3H), 2.33 (s, 3H), 2.10 – 2.04 (m, 1H), 1.91 – 1.84 (m, 1H), 1.16 (s, 3H).  **$^{19}\text{F}$  NMR (376 MHz,  $\text{CDCl}_3$ ):**  $\delta$  -60.31 (t,  $J = 11.3$  Hz, 3F).  **$^{13}\text{C}$  NMR (101 MHz,  $\text{CDCl}_3$ ):**  $\delta$  144.1, 142.7, 138.7, 138.5, 131.8, 130.1, 129.9, 129.2, 128.5, 128.0, 125.7 (q,  $J = 278.9$  Hz), 125.7, 117.7, 60.0, 55.8, 44.3 (d,  $J = 1.6$  Hz), 40.3 (q,  $J = 27.4$  Hz), 24.3, 21.6, 21.3. **HRMS (ESI,  $m/z$ ):** Calculated for  $\text{C}_{22}\text{H}_{24}\text{Br}_1\text{F}_3\text{O}_2\text{N}_1\text{S}_1$  ( $\text{M}+\text{H}$ )<sup>+</sup> 502.0658, found 502.0663.

**(4).(*E*)-4-(bromo(4-(*tert*-butyl)phenyl)methylene)-3-methyl-1-tosyl-3-(2,2,2-trifluoroethyl)pyrrolidine**

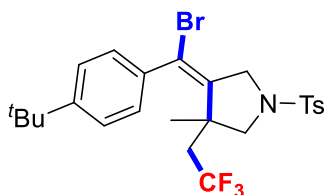

A slight yellow solid after purification by flash column chromatography (petroleum ether/ethyl acetate = 10/1, Yield: 66%).  **$^1\text{H}$  NMR (400 MHz,  $\text{CDCl}_3$ ):**  $\delta$  7.75 (d,  $J = 8.0$  Hz, 2H), 7.40 (d,  $J = 8.0$  Hz, 2H), 7.36 (d,  $J = 8.2$  Hz, 2H), 7.12 (d,  $J = 8.0$  Hz, 2H), 5.29 (s, 2H), 4.08 (d,  $J = 15.2$  Hz, 1H), 3.84 (d,  $J = 15.2$  Hz, 1H), 3.23 (s, 2H), 2.47 (s, 3H), 2.06 (dq,  $J = 15.2, 11.4$  Hz, 1H), 1.84 (dq,  $J = 15.2, 11.3$  Hz, 1H), 1.30 (s, 9H), 1.16 (s, 3H).  **$^{19}\text{F}$  NMR (376 MHz,  $\text{CDCl}_3$ ):**  $\delta$  -60.37 (s, 3F).  **$^{13}\text{C}$  NMR (101 MHz,  $\text{CDCl}_3$ ):**  $\delta$  152.6, 144.1, 142.8, 135.8, 131.6, 129.9, 128.3, 128.1, 125.7 (q,  $J = 278.7$  Hz), 125.5, 117.9, 59.9, 55.8, 53.4, 44.2, 40.3 (q,  $J = 27.4$  Hz), 34.8, 31.1, 24.3, 21.6. **HRMS (ESI,  $m/z$ ):** Calculated for  $\text{C}_{25}\text{H}_{30}\text{Br}_1\text{F}_3\text{N}_1\text{O}_2\text{S}_1$  ( $\text{M}+\text{H}$ )<sup>+</sup> 544.1127, found 544.1135.

**(5).(*E*)-4-([1,1'-biphenyl]-4-ylbromomethylene)-3-methyl-1-tosyl-3-(2,2,2-trifluoroethyl)pyrrolidine**

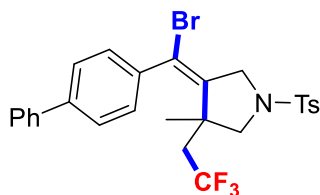

A slight yellow solid after purification by flash column chromatography (petroleum ether/ethyl acetate = 10/1, Yield: 65%).  **$^1\text{H}$  NMR (400 MHz,  $\text{CDCl}_3$ ):**  $\delta$  7.77 (d,  $J = 8.0$  Hz, 2H), 7.62 – 7.59 (m, 4H), 7.47 – 7.38 (m, 5H), 7.28 (d,  $J = 8.4$  Hz, 1H), 4.12 (d,  $J = 15.2$  Hz, 1H), 3.90 (d,  $J = 15.2$  Hz, 1H), 3.27 (q,  $J = 9.6$  Hz, 2H), 2.49 (s, 3H), 2.18 – 2.11 (m, 1H), 1.99 – 1.93 (m, 1H), 1.20 (s, 3H).  **$^{19}\text{F}$  NMR (376 MHz,  $\text{CDCl}_3$ ):**  $\delta$  -60.24 (t,  $J = 11.3$  Hz, 3F).  **$^{13}\text{C}$  NMR (101 MHz,  $\text{CDCl}_3$ ):**  $\delta$  144.1, 143.3, 142.1, 139.7, 137.6, 131.8, 129.9, 129.1, 128.9, 128.1, 128.0, 127.3, 127.1, 125.7 (q,  $J = 278.7$  Hz), 117.4, 60.0, 55.9, 44.4, 40.5 (q,  $J = 27.5$  Hz), 24.4, 21.6. **HRMS (ESI,  $m/z$ ):** Calculated for  $\text{C}_{27}\text{H}_{25}\text{Br}_1\text{F}_3\text{N}_1\text{O}_2\text{S}_1\text{Na}_1$  ( $\text{M}+\text{Na}$ )<sup>+</sup> 586.0634, found 586.0629.

**(6).(*E*)-4-(bromo(4-methoxyphenyl)methylene)-3-methyl-1-tosyl-3-(2,2,2-trifluoroethyl)pyrrolidine**

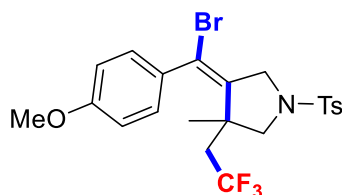

A slight yellow solid after purification by flash column chromatography (petroleum ether/ethyl acetate = 10/1, Yield: 62%).  $^1\text{H NMR}$  (400 MHz,  $\text{CDCl}_3$ ):  $\delta$  7.74 (d,  $J$  = 8.0 Hz, 2H), 7.40 (d,  $J$  = 8.0 Hz, 2H), 7.12 (d,  $J$  = 8.8 Hz, 2H), 6.87 (d,  $J$  = 8.8 Hz, 2H), 4.07 (d,  $J$  = 15.4 Hz, 1H), 3.83 (d,  $J$  = 15.4 Hz, 1H), 3.81 (s, 3H), 3.23 (s, 2H), 2.47 (s, 3H), 2.08 (dq,  $J$  = 15.0, 11.2 Hz, 1H), 1.90 (dq,  $J$  = 15.0, 11.2 Hz, 1H), 1.17 (s, 3H).  $^{19}\text{F NMR}$  (376 MHz,  $\text{CDCl}_3$ ):  $\delta$  -58.46 (s, 0.23F), -60.24 (t,  $J$  = 11.3 Hz, 3F).  $^{13}\text{C NMR}$  (101 MHz,  $\text{CDCl}_3$ ):  $\delta$  160.0, 144.1, 143.0, 131.5, 131.0, 130.0, 129.8, 128.0, 125.7 (q,  $J$  = 278.8 Hz), 117.9, 114.0, 60.0, 55.8, 55.3, 44.2, 40.3 (q,  $J$  = 27.4 Hz), 24.3, 21.6. HRMS (ESI,  $m/z$ ): Calculated for  $\text{C}_{22}\text{H}_{23}\text{Br}_1\text{F}_3\text{N}_1\text{O}_3\text{S}_1\text{Na}_1$  ( $\text{M}+\text{Na}$ ) $^+$  540.0426, found 540.0421.

**(7).(*E*)-4-(bromo(4-fluorophenyl)methylene)-3-methyl-1-tosyl-3-(2,2,2-trifluoroethyl)pyrrolidine**

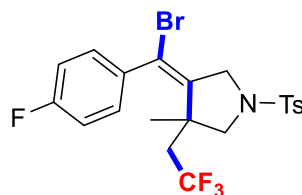

A slight yellow solid after purification by flash column chromatography (petroleum ether/ethyl acetate = 10/1, Yield: 60%).  $^1\text{H NMR}$  (400 MHz,  $\text{CDCl}_3$ ):  $\delta$  7.74 (d,  $J$  = 8.0 Hz, 2H), 7.40 (d,  $J$  = 8.0 Hz, 2H), 7.21 – 7.17 (m, 2H), 7.06 (t,  $J$  = 8.4 Hz, 2H), 4.06 (d,  $J$  = 15.4 Hz, 1H), 3.84 (d,  $J$  = 15.4 Hz, 1H), 3.23 (dd,  $J$  = 22.4, 9.4 Hz, 2H), 2.47 (s, 3H), 2.09 (dq,  $J$  = 15.0, 11.2 Hz, 1H), 1.86 (dq,  $J$  = 15.0, 11.2 Hz, 1H), 1.14 (s, 3H).  $^{19}\text{F NMR}$  (376 MHz,  $\text{CDCl}_3$ ):  $\delta$  -60.27 (t,  $J$  = 10.6 Hz, 3F), -110.36 (d,  $J$  = 3.3 Hz, 1F).  $^{13}\text{C NMR}$  (101 MHz,  $\text{CDCl}_3$ ):  $\delta$  164.0, 161.5, 144.2, 143.7, 134.8 (d,  $J$  = 3.7 Hz), 131.5, 130.6 (d,  $J$  = 8.4 Hz), 129.9, 128.0, 125.5 (q,  $J$  = 278.8 Hz), 116.4, 116.0, 115.8, 59.9, 55.8, 44.3, 40.4 (q,  $J$  = 27.5 Hz), 24.3, 21.6. HRMS (ESI,  $m/z$ ): Calculated for  $\text{C}_{21}\text{H}_{20}\text{Br}_1\text{F}_4\text{N}_1\text{O}_2\text{S}_1\text{Na}_1$  ( $\text{M}+\text{Na}$ ) $^+$  528.0226, found 528.0220.

**(8).(*E*)-4-(bromo(4-chlorophenyl)methylene)-3-methyl-1-tosyl-3-(2,2,2-trifluoroethyl)pyrrolidine**

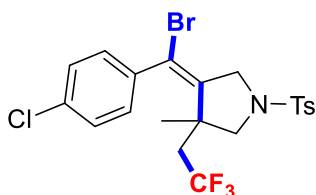

A slight yellow solid after purification by flash column chromatography (petroleum



ether/ethyl acetate = 10/1, Yield: 71%). **<sup>1</sup>H NMR (600 MHz, CDCl<sub>3</sub>):** δ 7.75 (d, *J* = 7.8 Hz, 2H), 7.40 (d, *J* = 7.8 Hz, 2H), 7.35 (d, *J* = 8.4 Hz, 2H), 7.14 (d, *J* = 8.4 Hz, 2H), 4.06 (d, *J* = 15.6 Hz, 1H), 3.85 (d, *J* = 15.6 Hz, 1H), 3.24 (dd, *J* = 43.3, 9.6 Hz, 2H), 2.47 (s, 3H), 2.11 (dq, *J* = 22.6, 11.4 Hz, 1H), 1.89 (dq, *J* = 22.6, 11.4 Hz, 1H), 1.14 (s, 3H). **<sup>19</sup>F NMR (376 MHz, CDCl<sub>3</sub>):** δ -60.23 (t, *J* = 11.1 Hz, 3F). **<sup>13</sup>C NMR (101 MHz, CDCl<sub>3</sub>):** δ 144.2, 143.9, 137.2, 135.4, 131.8, 130.1, 129.9, 129.0, 128.1, 125.6 (q, *J* = 278.9 Hz), 116.1, 59.9, 55.9, 44.6, 40.5 (q, *J* = 27.3 Hz), 24.3, 21.6. **HRMS (ESI, m/z):** Calculated for C<sub>21</sub>H<sub>21</sub>BrClF<sub>3</sub>N<sub>1</sub>O<sub>2</sub>S<sub>1</sub> (M+H)<sup>+</sup> 522.0112, found 522.0115.

**(9).(*E*)-1-(4-(bromo(4-methyl-1-tosyl-4-(2,2,2-trifluoroethyl)pyrrolidin-3-ylidene)methyl)phenyl)ethan-1-one**

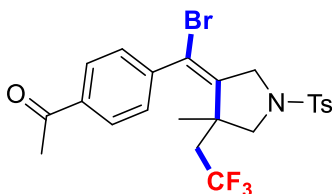

A slight yellow solid after purification by flash column chromatography (petroleum ether/ethyl acetate = 10/1, Yield: 64%). **<sup>1</sup>H NMR (400 MHz, CDCl<sub>3</sub>):** δ 7.96 (d, *J* = 8.0 Hz, 2H), 7.75 (d, *J* = 8.0 Hz, 2H), 7.40 (d, *J* = 8.0 Hz, 2H), 7.32 (d, *J* = 8.0 Hz, 2H), 4.09 (d, *J* = 15.6 Hz, 1H), 3.90 (d, *J* = 15.6 Hz, 1H), 3.26 (dd, *J* = 37.4, 9.6 Hz, 2H), 2.62 (s, 3H), 2.48 (s, 3H), 2.15 – 2.09 (m, 1H), 1.91 – 1.84 (m, 1H), 1.14 (s, 3H). **<sup>19</sup>F NMR (376 MHz, CDCl<sub>3</sub>):** δ -60.24 (t, *J* = 11.1 Hz, 3F). **<sup>13</sup>C NMR (101 MHz, CDCl<sub>3</sub>):** δ 196.9, 144.2, 143.9, 143.2, 137.4, 131.8, 129.9, 129.1, 128.6, 128.1, 125.5 (q, *J* = 278.9 Hz), 115.8, 59.9, 55.9, 44.4, 40.5 (q, *J* = 27.6 Hz), 26.6, 24.3, 21.6. **HRMS (ESI, m/z):** Calculated for C<sub>23</sub>H<sub>24</sub>BrF<sub>3</sub>N<sub>1</sub>O<sub>3</sub>S<sub>1</sub> (M+H)<sup>+</sup> 530.0607, found 530.0602.

**(10).(*E*)-4-(bromo(thiophen-2-yl)methylene)-3-methyl-1-tosyl-3-(2,2,2-trifluoroethyl)pyrrolidine**

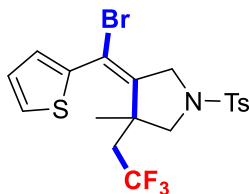

A colorless liquid after purification by flash column chromatography (petroleum ether/ethyl acetate = 10/1, Yield: 75%). **<sup>1</sup>H NMR (400 MHz, CDCl<sub>3</sub>):** δ 7.74 (d, *J* = 8.0 Hz, 2H), 7.40 (d, *J* = 6.8 Hz, 3H), 6.99 – 6.96 (m, 2H), 4.07 (d, *J* = 15.8 Hz, 1H), 3.81 (d, *J* = 15.8 Hz, 1H), 3.25 (q, *J* = 2.8 Hz, 2H), 2.47 (s, 3H), 2.22 – 2.00 (m, 2H), 1.26 (s, 3H). **<sup>19</sup>F NMR (376 MHz, CDCl<sub>3</sub>):** δ -59.76 (s, 0.09F), -60.21 (t, *J* = 11.2 Hz, 3F). **<sup>13</sup>C NMR (101 MHz, CDCl<sub>3</sub>):** δ 147.3, 144.2, 139.4, 131.4, 129.9, 129.0, 128.1, 128.0, 126.8, 125.7 (q, *J* = 278.7 Hz), 109.5, 60.0 (d, *J* = 2.3 Hz), 56.1, 44.6, 39.7 (q, *J* = 27.6 Hz), 23.9, 21.6. **HRMS (ESI, m/z):** Calculated for C<sub>19</sub>H<sub>20</sub>BrF<sub>3</sub>N<sub>1</sub>O<sub>2</sub>S<sub>2</sub> (M+H)<sup>+</sup> 494.0065, found 494.0060.

**(11).(*E*)-2-(bromo(4-methyl-1-tosyl-4-(2,2,2-trifluoroethyl)pyrrolidin-3-ylidene)methyl)pyridine**

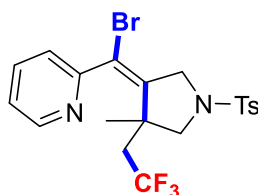

A slight yellow solid after purification by flash column chromatography (petroleum ether/ethyl acetate = 5/1, Yield: 61%).  $^1\text{H NMR}$  (400 MHz,  $\text{CDCl}_3$ ):  $\delta$  8.56 (d,  $J$  = 4.4 Hz, 1H), 7.75 – 7.71 (m, 3H), 7.40 – 7.36 (m, 3H), 7.28 – 7.25 (m, 1H), 4.04 (d,  $J$  = 15.6 Hz, 1H), 3.93 (d,  $J$  = 15.6 Hz, 1H), 3.49 (d,  $J$  = 9.6 Hz, 1H), 2.98 (d,  $J$  = 9.6 Hz, 1H), 2.59 – 2.50 (m, 1H), 2.47 (s, 3H), 2.39 – 2.29 (m, 1H), 0.98 (s, 3H).  $^{19}\text{F NMR}$  (376 MHz,  $\text{CDCl}_3$ ):  $\delta$  -60.23 (s, 3F).  $^{13}\text{C NMR}$  (101 MHz,  $\text{CDCl}_3$ ):  $\delta$  156.3, 148.8, 145.4, 144.2, 136.9, 131.3, 129.9, 128.0, 125.8 (q,  $J$  = 278.9 Hz), 124.5, 123.8, 116.0, 59.7, 55.9, 44.7, 39.6 (q,  $J$  = 27.3 Hz), 21.9, 21.6. HRMS (ESI,  $m/z$ ): Calculated for  $\text{C}_{20}\text{H}_{21}\text{BrF}_3\text{N}_2\text{O}_2\text{S}_1$  ( $\text{M}+\text{H}$ ) $^+$  489.0454, found 489.0461.

**(12).(*E*)-4-(bromo(4-chlorophenyl)methylene)-3-methyl-1-tosyl-3-(2,2,2-trifluoroethyl)pyrrolidin-2-one**

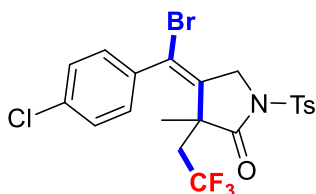

A slight yellow solid after purification by flash column chromatography (petroleum ether/ethyl acetate = 20/1, Yield: 67%).  $^1\text{H NMR}$  (400 MHz,  $\text{CDCl}_3$ ):  $\delta$  7.96 (d,  $J$  = 8.4 Hz, 2H), 7.37 (t,  $J$  = 9.2 Hz, 4H), 7.21 (d,  $J$  = 8.4 Hz, 2H), 4.72 (d,  $J$  = 15.5 Hz, 1H), 4.37 (d,  $J$  = 15.5 Hz, 1H), 2.46 (s, 3H), 2.39 – 2.30 (m, 1H), 1.99 – 1.88 (m, 1H), 1.13 (s, 3H).  $^{19}\text{F NMR}$  (376 MHz,  $\text{CDCl}_3$ ):  $\delta$  -62.30 (t,  $J$  = 10.2 Hz, 3F), -63.20 (t,  $J$  = 10.4 Hz, 0.22F).  $^{13}\text{C NMR}$  (101 MHz,  $\text{CDCl}_3$ ):  $\delta$  173.7, 145.8, 136.6, 135.8, 134.0, 133.7, 130.2, 130.0, 129.1, 128.4, 124.7 (q,  $J$  = 278.6 Hz), 120.2, 52.8, 47.4, 41.2 (q,  $J$  = 27.6 Hz), 25.7, 21.8. HRMS (ESI,  $m/z$ ): Calculated for  $\text{C}_{21}\text{H}_{19}\text{BrClF}_3\text{N}_1\text{O}_3\text{S}_1$  ( $\text{M}+\text{H}$ ) $^+$  535.9904, found 535.9904.

**(13).(*E*)-4-(bromo(4-(tert-butyl)phenyl)methylene)-3-methyl-1-tosyl-3-(2,2,2-trifluoroethyl)pyrrolidin-2-one**

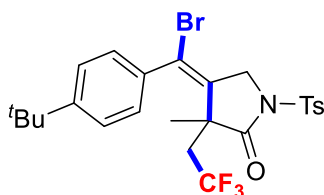

A slight yellow solid after purification by flash column chromatography (petroleum ether/ethyl acetate = 20/1, Yield: 65%).  $^1\text{H NMR}$  (400 MHz,  $\text{CDCl}_3$ ):  $\delta$  7.96 (d,  $J$  = 8.4 Hz, 2H), 7.37 (dd,  $J$  = 14.6, 8.3 Hz, 4H), 7.19 (d,  $J$  = 8.4 Hz, 2H), 4.73 (d,  $J$  =

15.2 Hz, 1H), 4.38 (d,  $J = 15.2$  Hz, 1H), 2.45 (s, 3H), 2.35 – 2.27 (m, 1H), 2.07 – 1.95 (m, 1H), 1.32 (s, 9H), 1.11 (s, 3H).  $^{19}\text{F}$  NMR (376 MHz,  $\text{CDCl}_3$ ):  $\delta$  -62.25 (t,  $J = 10.2$  Hz, 3F), -63.19 (t,  $J = 10.4$  Hz, 0.31F).  $^{13}\text{C}$  NMR (101 MHz,  $\text{CDCl}_3$ ):  $\delta$  174.1, 152.9, 145.7, 135.2, 134.1, 132.5, 129.6, 128.4 (q,  $J = 3.5$  Hz), 125.5, 124.9 (q,  $J = 278.6$  Hz), 122.0, 52.9, 47.5, 41.3 (q,  $J = 27.3$  Hz), 34.8, 31.2, 25.6, 21.7. HRMS (ESI,  $m/z$ ): Calculated for  $\text{C}_{25}\text{H}_{28}\text{Br}_1\text{F}_3\text{N}_1\text{O}_3\text{S}_1$  ( $\text{M}+\text{H}$ ) $^+$  558.0920, found 558.0922.

**(14).(*E*)-4-(bromo(phenyl)methylene)-3-methyl-3-(2,2,2-trifluoroethyl)tetrahydrofuran**

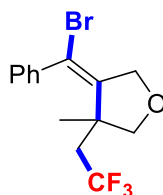

A colorless liquid after purification by flash column chromatography (petroleum ether/ethyl acetate = 20/1, Yield: 55%).  $^1\text{H}$  NMR (400 MHz,  $\text{CDCl}_3$ ):  $\delta$  7.42 – 7.37 (m, 3H), 7.30 – 7.28 (m, 2H), 4.59 (d,  $J = 14.8$  Hz, 1H), 4.50 (d,  $J = 14.8$  Hz, 1H), 3.96 (d,  $J = 8.8$  Hz, 1H), 3.79 (d,  $J = 8.8$  Hz, 1H), 2.21 – 2.08 (m, 1H), 1.96 – 1.84 (m, 1H), 1.14 (s, 3H).  $^{19}\text{F}$  NMR (376 MHz,  $\text{CDCl}_3$ ):  $\delta$  -60.23 (t,  $J = 11.5$  Hz, 0.11F), -60.61 (t,  $J = 11.5$  Hz, 3F).  $^{13}\text{C}$  NMR (101 MHz,  $\text{CDCl}_3$ ):  $\delta$  146.4, 139.0, 129.1, 128.8, 128.6, 126.0 (q,  $J = 278.7$  Hz), 114.3, 80.2 (d,  $J = 2.4$  Hz), 75.3, 45.2, 39.8 (q,  $J = 27.3$  Hz), 23.2. HRMS (ESI,  $m/z$ ): Calculated for  $\text{C}_{14}\text{H}_{15}\text{Br}_1\text{F}_3\text{O}_1$  ( $\text{M}+\text{H}$ ) $^+$  335.0253, found 335.0250.

**(15).(*E*)-4-(bromo(phenyl)methylene)-3-methyl-3-(2,2,2-trifluoroethyl)dihydrofuran-2(3H)-one**

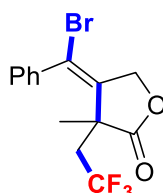

A colorless liquid after purification by flash column chromatography (petroleum ether/ethyl acetate = 20/1, Yield: 40%).  $^1\text{H}$  NMR (400 MHz,  $\text{CDCl}_3$ ):  $\delta$  7.45 – 7.43 (m, 3H), 7.33 – 7.30 (m, 2H), 4.98 (d,  $J = 15.4$  Hz, 1H), 4.88 (d,  $J = 15.4$  Hz, 1H), 2.50 (dq,  $J = 15.1, 10.2$  Hz, 1H), 2.13 (dq,  $J = 15.2, 10.0$  Hz, 1H), 1.21 (s, 3H).  $^{19}\text{F}$  NMR (376 MHz,  $\text{CDCl}_3$ ):  $\delta$  -62.13 (t,  $J = 10.2$  Hz, 3F), -62.94 (t,  $J = 10.2$  Hz, 0.15F).  $^{13}\text{C}$  NMR (101 MHz,  $\text{CDCl}_3$ ):  $\delta$  178.8, 137.7, 136.1, 129.7, 128.7, 127.5, 124.9 (q,  $J = 278.3$  Hz), 119.4, 72.0, 44.32 – 44.27 (m), 41.6 (q,  $J = 27.8$  Hz), 25.7. HRMS (ESI,  $m/z$ ): Calculated for  $\text{C}_{14}\text{H}_{16}\text{Br}_1\text{F}_3\text{O}_2\text{N}_1$  ( $\text{M}+\text{NH}_4$ ) $^+$  366.0311, found 366.0316.

**(16).(*E*)-3-(bromo(*p*-tolyl)methylene)-4-methyl-4-(2,2,2-trifluoroethyl)dihydrofuran-2(3H)-one**

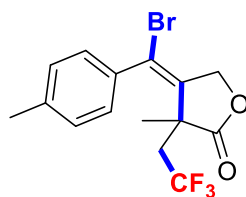

A colorless oil after purification by flash column chromatography (petroleum ether/ethyl acetate = 20/1, Yield: 40%). **<sup>1</sup>H NMR (400 MHz, CDCl<sub>3</sub>):** δ 7.23 (d, *J* = 8.2 Hz, 2H), 7.20 (d, *J* = 8.2 Hz, 2H), 4.97 (d, *J* = 14.7 Hz, 1H), 4.87 (d, *J* = 14.7 Hz, 1H), 2.52 – 2.46 (m, 1H), 2.39 (s, 3H), 2.19 – 2.12 (m, 1H), 1.23 (s, 3H). **<sup>19</sup>F NMR (376 MHz, CDCl<sub>3</sub>):** δ -62.13 (t, *J* = 10.1 Hz, 3F), -62.96 (t, *J* = 10.3 Hz, 0.30F). **<sup>13</sup>C NMR (101 MHz, CDCl<sub>3</sub>):** δ 178.9, 139.8, 135.8, 134.8, 129.4, 128.6, 124.9 (q, *J* = 278.4 Hz), 119.7, 72.0, 44.3 (q, *J* = 2.4 Hz), 41.5 (q, *J* = 27.7 Hz), 25.7, 21.3. **HRMS (ESI, m/z):** Calculated for C<sub>15</sub>H<sub>14</sub>BrF<sub>3</sub>O<sub>2</sub>Na<sub>1</sub> (M+Na)<sup>+</sup> 385.0021, found 385.0019.

**(17). (E)-3-(bromo(4-chlorophenyl)methylene)-4-(2,2,2-trifluoroethyl)dihydrofuran-2(3H)-one**

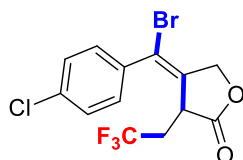

A slight yellow oil after purification by flash column chromatography (petroleum ether/ethyl acetate = 20/1, Yield: 45%). **<sup>1</sup>H NMR (400 MHz, CDCl<sub>3</sub>):** δ 7.37 (d, *J* = 9.0 Hz, 2H), 7.34 (d, *J* = 9.0 Hz, 2H), 4.89 – 4.40 (m, 2H), 3.71 – 3.66 (m, 1H), 2.82 – 2.70 (m, 1H), 2.54 – 2.40 (m, 1H). **<sup>19</sup>F NMR (376 MHz, CDCl<sub>3</sub>):** δ -64.61 (t, *J* = 10.4 Hz, 3F). **<sup>13</sup>C NMR (101 MHz, CDCl<sub>3</sub>):** δ 164.2, 139.4, 136.6, 135.1, 130.2, 128.5, 128.4, 125.9 (q, *J* = 277.8 Hz), 68.1 (d, *J* = 1.8 Hz), 39.4 (d, *J* = 2.8 Hz), 35.8 (q, *J* = 28.1 Hz). **HRMS (ESI, m/z):** Calculated for C<sub>13</sub>H<sub>9</sub>BrClF<sub>3</sub>O<sub>2</sub>Na<sub>1</sub> (M+Na)<sup>+</sup> 390.9319, found 390.9315.

**(18). (E)-5-(bromo(phenyl)methylene)-4-(2,2,2-trifluoroethyl)tetrahydro-2H-pyran-2-one**

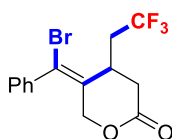

A colorless liquid after purification by flash column chromatography (petroleum ether/ethyl acetate = 20/1, Yield: 40%). **<sup>1</sup>H NMR (400 MHz, CDCl<sub>3</sub>):** δ 7.46 – 7.44 (m, 2H), 7.35 – 7.30 (m, 3H), 4.98 (s, 2H), 4.55 – 4.48 (m, 1H), 3.13 (dd, *J* = 16.7, 8.1 Hz, 1H), 3.04 (dd, *J* = 16.7, 8.1 Hz, 1H), 2.91 – 2.82 (m, 2H). **<sup>19</sup>F NMR (376 MHz, CDCl<sub>3</sub>):** δ -63.84 (t, *J* = 10.1 Hz, 3F). **<sup>13</sup>C NMR (101 MHz, CDCl<sub>3</sub>):** δ 168.7, 131.9, 128.9, 128.3, 125.0 (q, *J* = 278.1 Hz), 121.9, 87.09, 82.2, 53.5, 43.0, 42.1 (q, *J* = 29.0 Hz), 36.8 (q, *J* = 3.3 Hz). **HRMS (ESI, m/z):** Calculated for C<sub>14</sub>H<sub>12</sub>BrF<sub>3</sub>O<sub>2</sub>Na<sub>1</sub> (M+Na)<sup>+</sup> 370.9865, found 370.9863.

(20)

**(E)-4-(furan-3-yl(thiophen-2-yl)methylene)-3-methyl-1-tosyl-3-(2,2,2-trifluoroethyl)pyrrolidine**

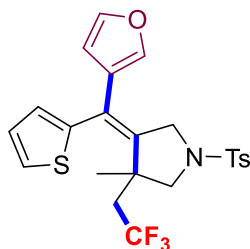

A white solid after purification by flash column chromatography (petroleum ether/ethyl acetate = 10/1, Yield: 82%).  $^1\text{H NMR}$  (400 MHz,  $\text{CDCl}_3$ ):  $\delta$  7.73 (d,  $J$  = 8.2 Hz, 2H), 7.39 (d,  $J$  = 8.1 Hz, 2H), 7.34 – 7.31 (m, 2H), 7.12 (s, 1H), 6.99 (dd,  $J$  = 5.2, 3.6 Hz, 1H), 6.85 (dd,  $J$  = 3.6, 1.2 Hz, 1H), 6.14 (d,  $J$  = 1.0 Hz, 1H), 4.11 (d,  $J$  = 14.8 Hz, 1H), 3.90 (d,  $J$  = 14.8 Hz, 1H), 3.19 (dd,  $J$  = 21.1, 9.5 Hz, 1H), 2.46 (s, 3H), 2.26 – 2.10 (m, 2H), 1.27 (s, 3H).  $^{19}\text{F NMR}$  (376 MHz,  $\text{CDCl}_3$ ):  $\delta$  -59.93 (t,  $J$  = 11.4 Hz, 0.15F), -60.05 (t,  $J$  = 11.5 Hz, 3F).  $^{13}\text{C NMR}$  (101 MHz,  $\text{CDCl}_3$ ):  $\delta$  144.2, 143.2, 142.9, 140.8, 139.5, 131.4, 129.9, 128.0, 127.8, 127.0, 126.6, 126.2, 126.0 (q,  $J$  = 274.7 Hz), 121.0, 110.0, 59.3, 53.1, 44.0, 40.1 (q,  $J$  = 27.2 Hz), 24.6, 21.6. **HRMS (ESI, m/z)**: Calculated for  $\text{C}_{23}\text{H}_{23}\text{F}_3\text{N}_1\text{O}_3\text{S}_2$  ( $\text{M}+\text{H}$ ) $^+$  482.1066, found 482.1064.

**(21).(E)-4-(3-(4-(tert-butyl)phenyl)-1-(thiophen-2-yl)prop-2-yn-1-ylidene)-3-methyl-1-tosyl-3-(2,2,2-trifluoroethyl)pyrrolidine**

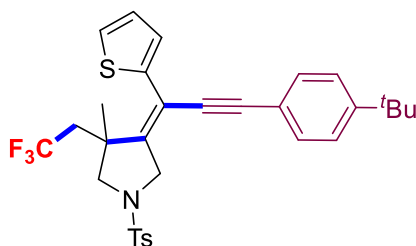

A white solid after purification by flash column chromatography (petroleum ether/ethyl acetate = 10/1, Yield: 74%).  $^1\text{H NMR}$  (400 MHz,  $\text{CDCl}_3$ ):  $\delta$  7.76 (d,  $J$  = 8.2 Hz, 2H), 7.39 (d,  $J$  = 8.2 Hz, 2H), 7.35 – 7.32 (m, 4H), 7.02 – 6.96 (m, 2H), 4.33 (d,  $J$  = 16.4 Hz, 1H), 4.05 (d,  $J$  = 16.4 Hz, 1H), 3.24 (dd,  $J$  = 25.9, 9.5 Hz, 2H), 2.47 (s, 3H), 2.30 – 2.10 (m, 2H), 1.35 (s, 3H), 1.33 (s, 9H).  $^{19}\text{F NMR}$  (376 MHz,  $\text{CDCl}_3$ ):  $\delta$  -60.10 (t,  $J$  = 11.4 Hz, 3F).  $^{13}\text{C NMR}$  (101 MHz,  $\text{CDCl}_3$ ):  $\delta$  152.5, 152.2, 144.1, 137.2, 131.8, 131.2, 129.8, 128.0, 127.8, 126.9, 126.6, 126.0 (d,  $J$  = 279.0 Hz), 125.4, 119.4, 111.9, 96.5, 87.2, 60.1, 53.9, 43.7, 39.5 (q,  $J$  = 27.2 Hz), 34.8, 31.1, 26.9, 24.1,

21.6. **HRMS (ESI, m/z):** Calculated for  $C_{31}H_{33}F_3N_1O_2S_2$  (M+H)<sup>+</sup> 572.1899, found 572.1907.

**(22).methyl(5E)-5-(4-methyl-1-tosyl-4-(2,2,2-trifluoroethyl)pyrrolidin-3-ylidene)-5-(thiophen-2-yl)pent-2-enoate**

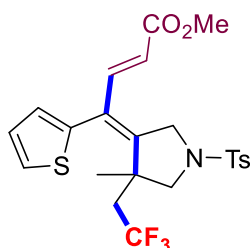

A white solid after purification by flash column chromatography (petroleum ether/ethyl acetate = 10/1, Yield: 70%). **<sup>1</sup>H NMR (400 MHz, CDCl<sub>3</sub>):** δ 7.62 (d, *J* = 8.2 Hz, 2H), δ 7.36 (d, *J* = 8.2 Hz, 2H), 7.33 (d, *J* = 5.3 Hz, 1H), 7.03 – 7.01 (m, 1H), 6.81 (d, *J* = 3.3 Hz, 1H), 6.19 (s, 1H), 5.84 (t, *J* = 7.2 Hz, 1H), 3.67 (s, 3H), 3.63 (d, *J* = 10.7 Hz, 1H), 3.30 (d, *J* = 10.7 Hz, 1H), 3.11 (d, *J* = 7.2 Hz, 1H), 2.46 (s, 3H), 2.49 – 2.36 (m, 1H), 2.11 – 1.99 (m, 1H), 1.26 (s, 3H). **<sup>19</sup>F NMR (376 MHz, CDCl<sub>3</sub>):** δ -60.23 (t, *J* = 11.3 Hz, 3F), -60.33 (t, *J* = 11.2 Hz, 0.3F). **<sup>13</sup>C NMR (101 MHz, CDCl<sub>3</sub>):** δ 171.7, 144.4, 139.0, 132.4 (q, *J* = 6.9 Hz), 130.7, 129.8, 129.6, 127.7, 127.0, 126.3, 122.5, 60.4, 52.0, 45.3, 40.3 (q, *J* = 26.6 Hz), 34.7, 24.4, 21.6. **HRMS (ESI, m/z):** Calculated for  $C_{23}H_{25}F_3N_1O_4S_2$  (M+H)<sup>+</sup> 500.1172, found 500.1179.

# Copies of the $^1\text{H}$ NMR, $^{19}\text{F}$ NMR and $^{13}\text{C}$ NMR spectra

## 1. $^1\text{H}$ NMR

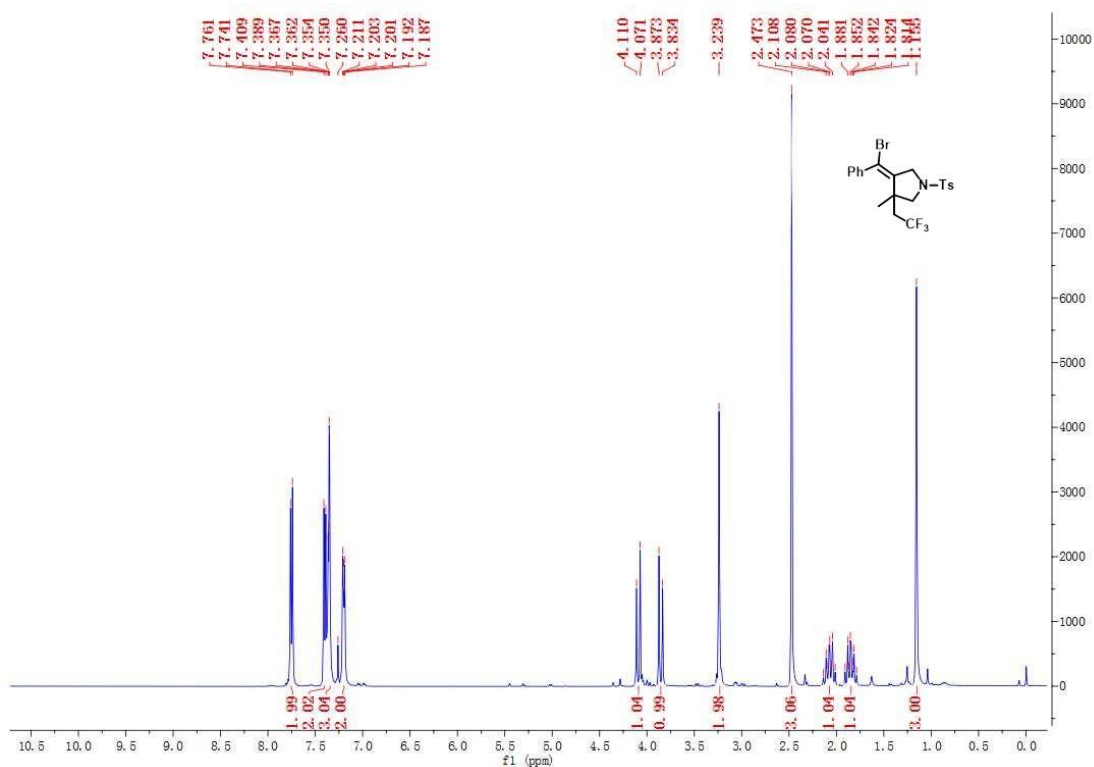

## 1. $^{19}\text{F}$ NMR

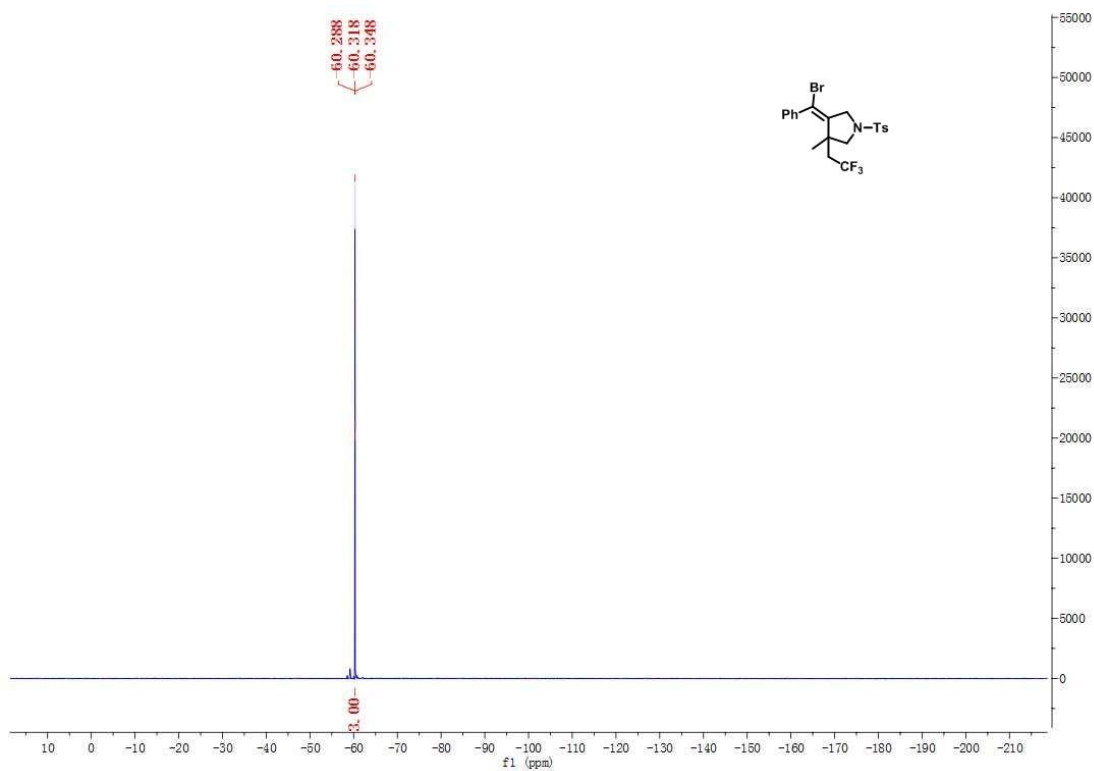

## 1. $^{13}\text{C}$ NMR

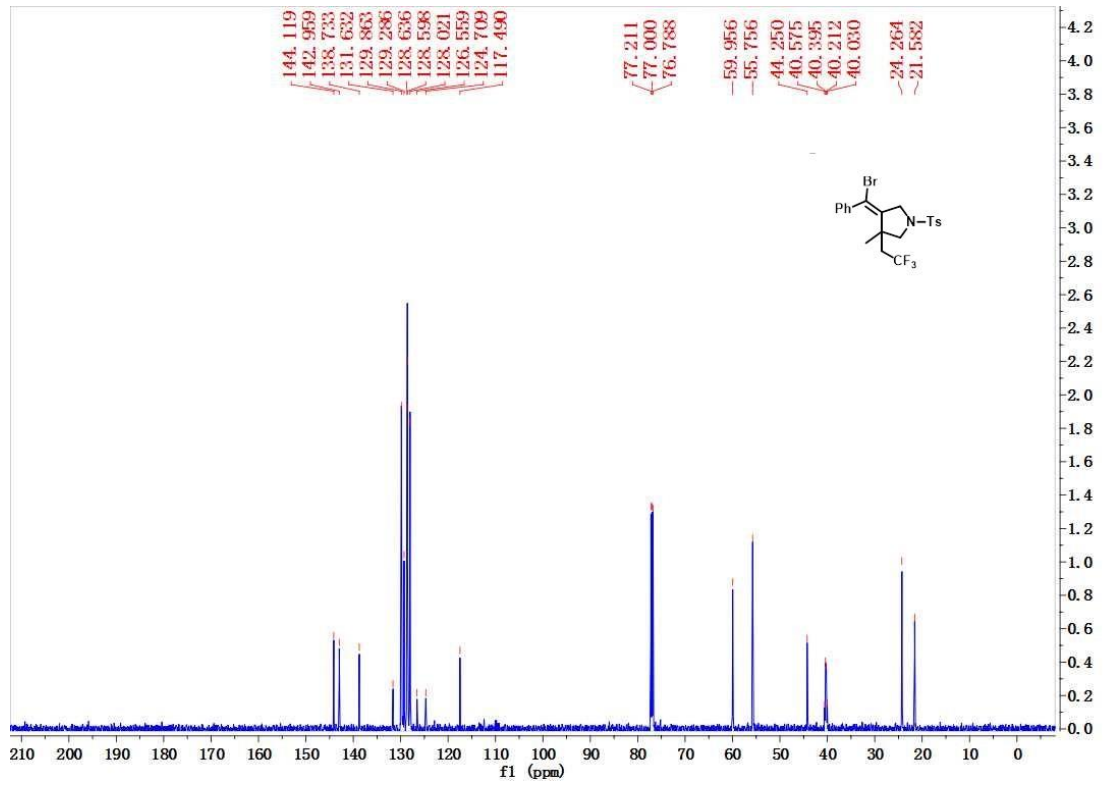

## 2. $^1\text{H}$ NMR

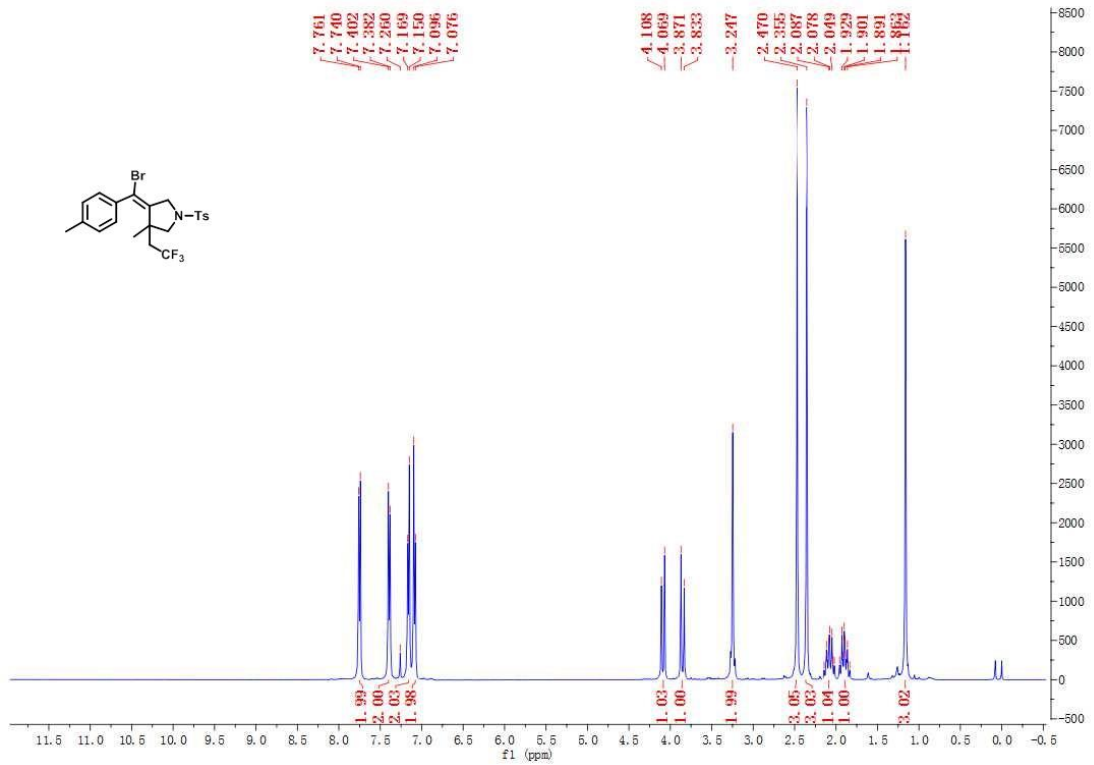



## 2. <sup>19</sup>F NMR

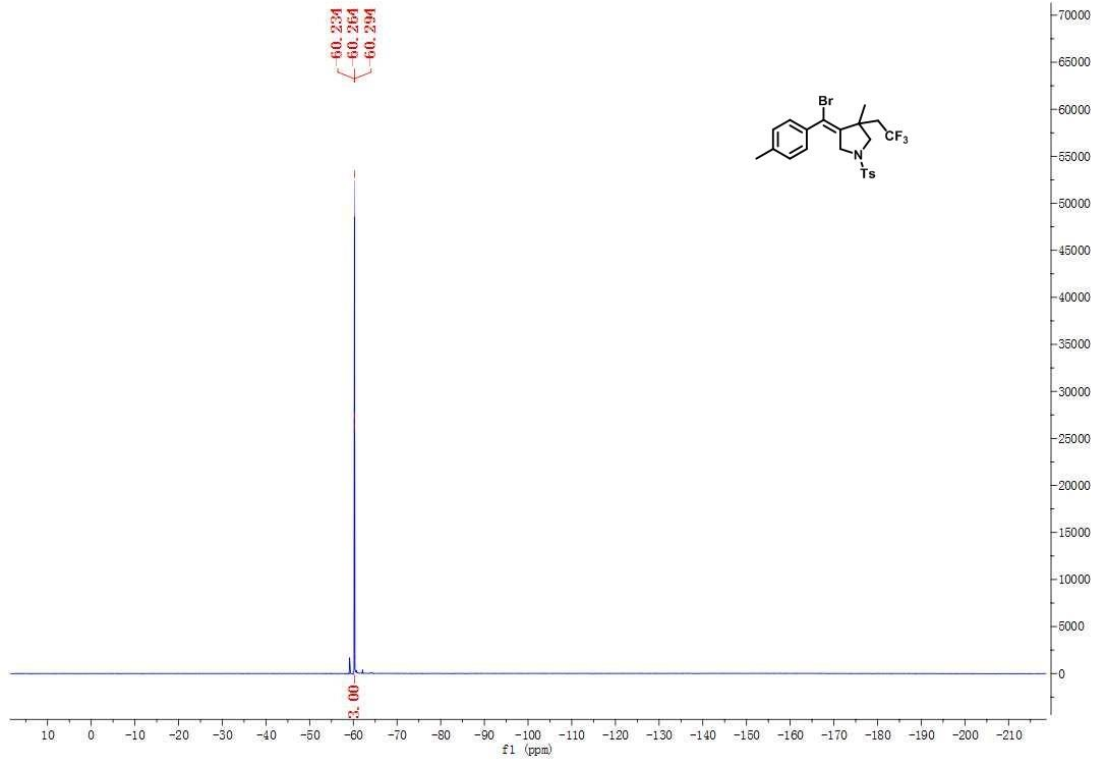

## 2. <sup>13</sup>C NMR

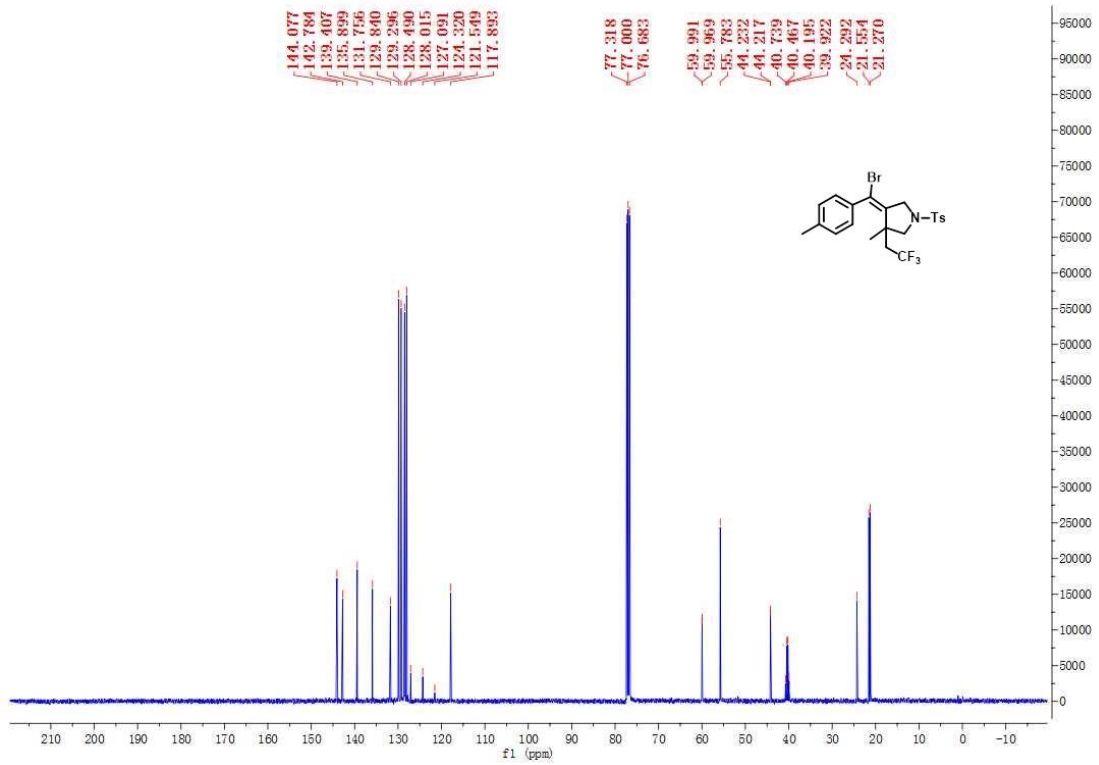

### 3. <sup>1</sup>H NMR

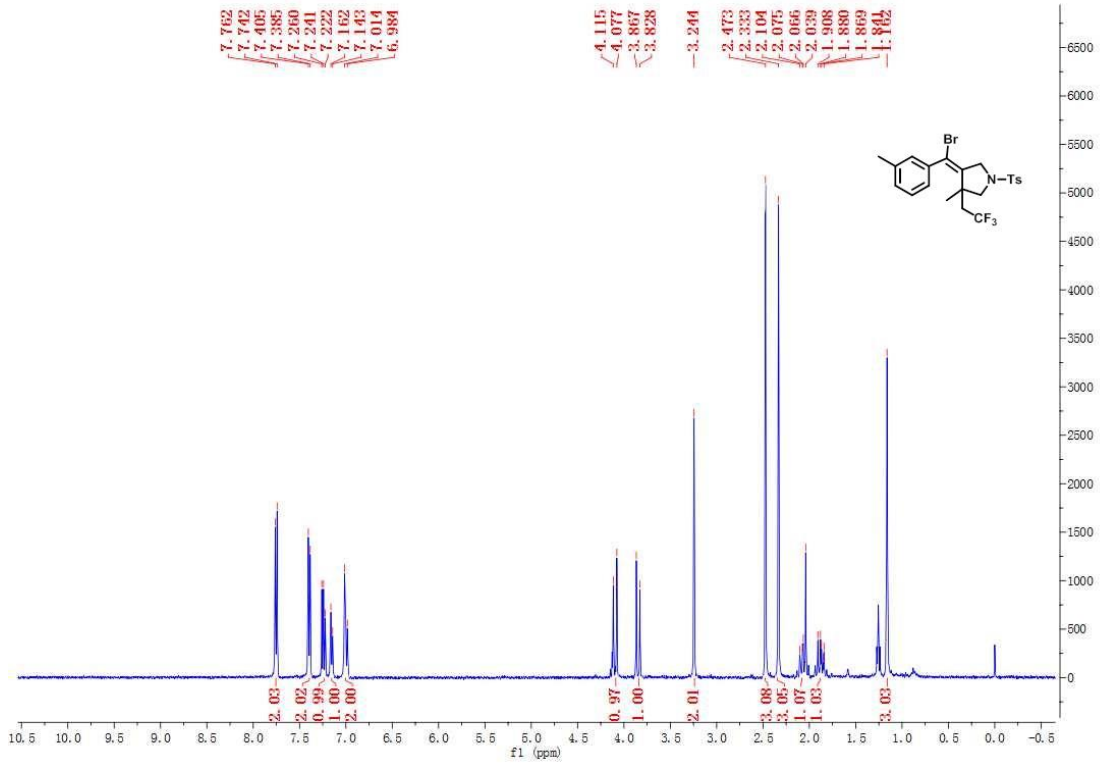

### 3. <sup>19</sup>F NMR

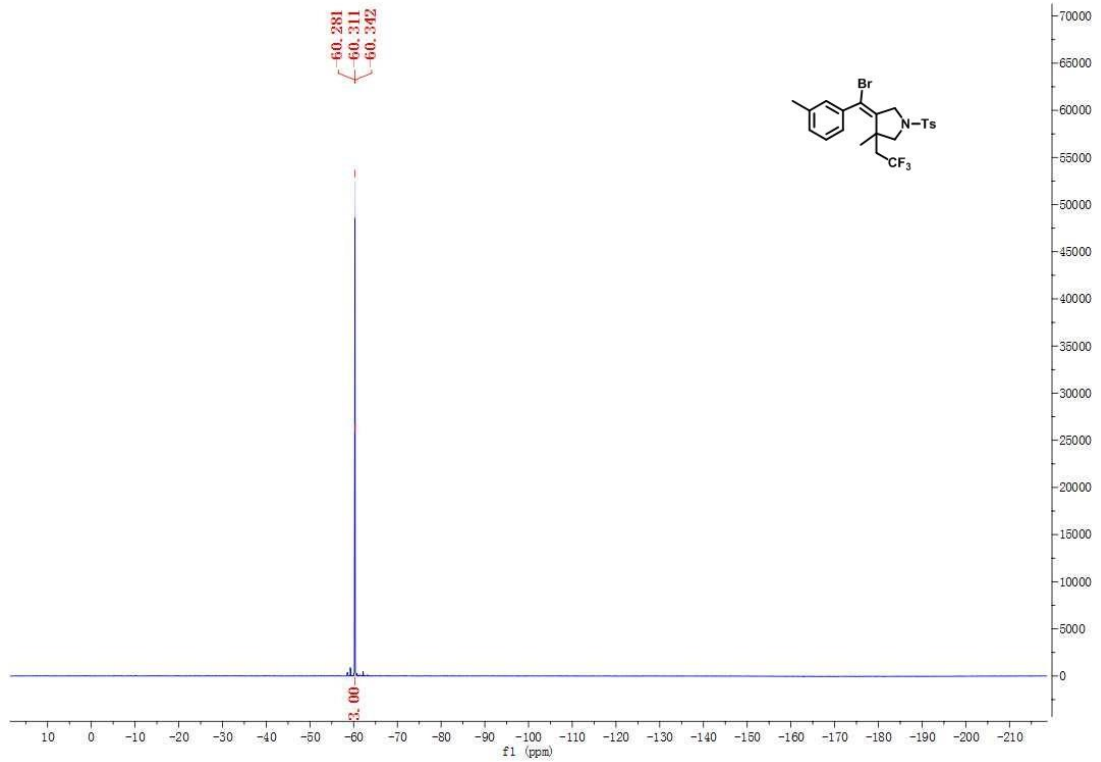

### 3. <sup>13</sup>C NMR

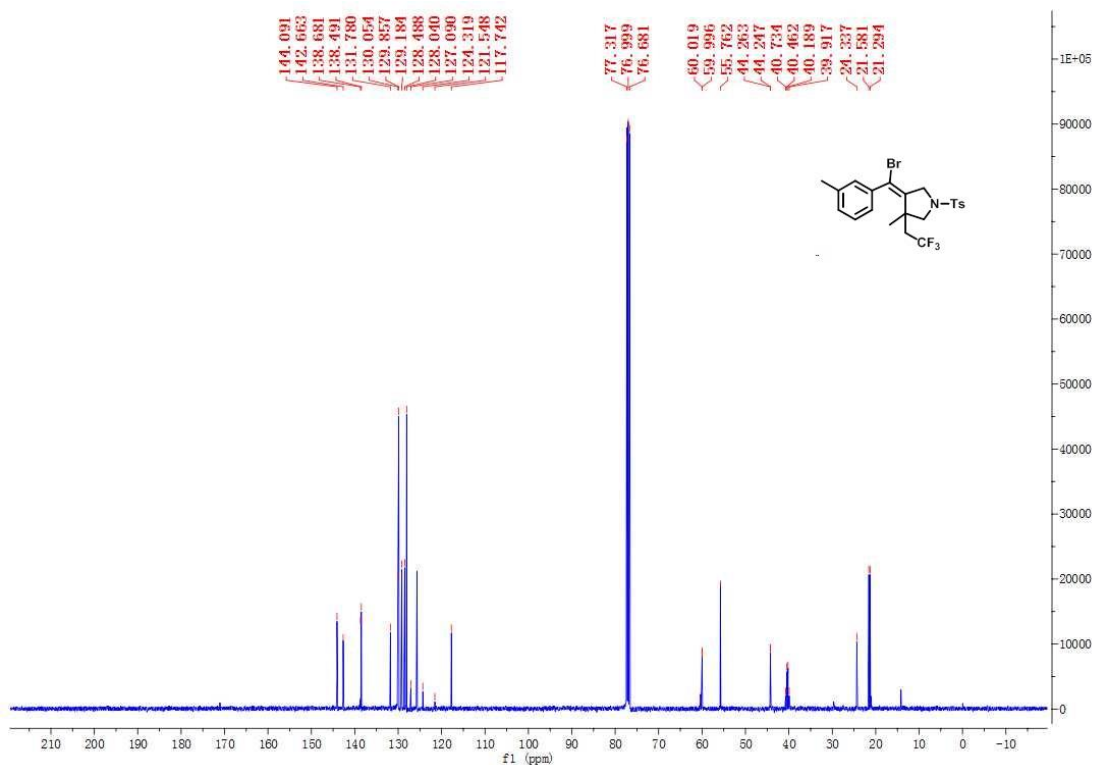

### 4. <sup>1</sup>H NMR

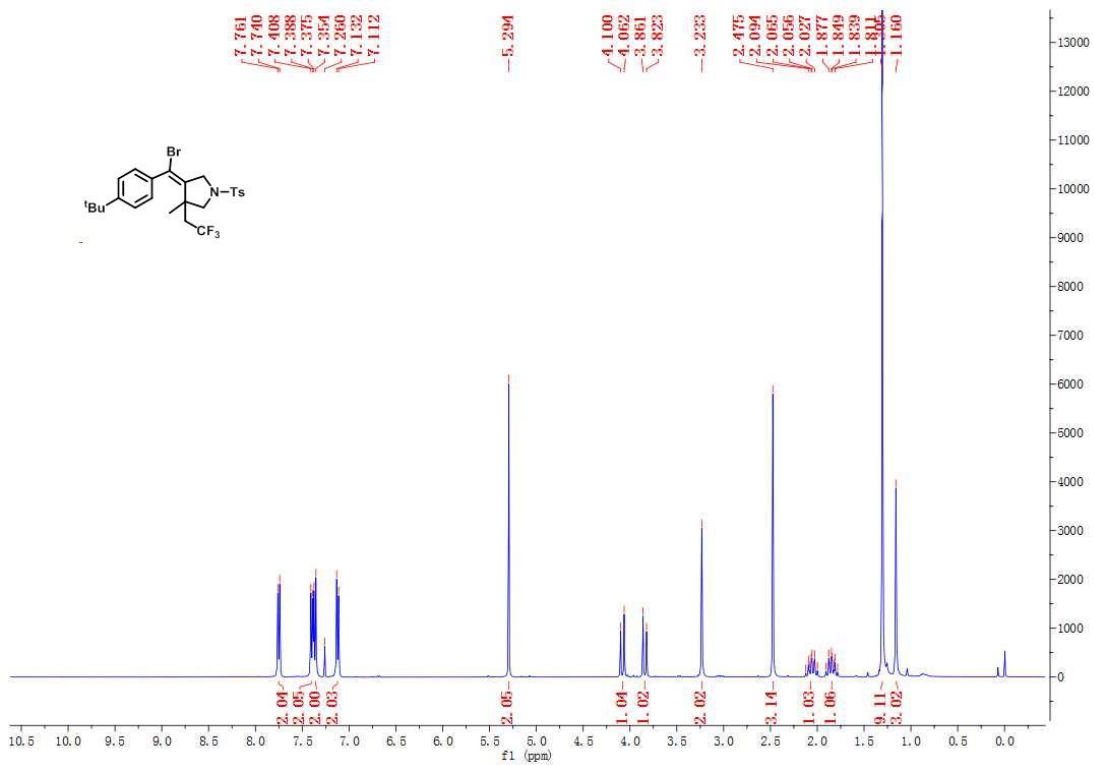

## 4. $^{19}\text{F}$ NMR

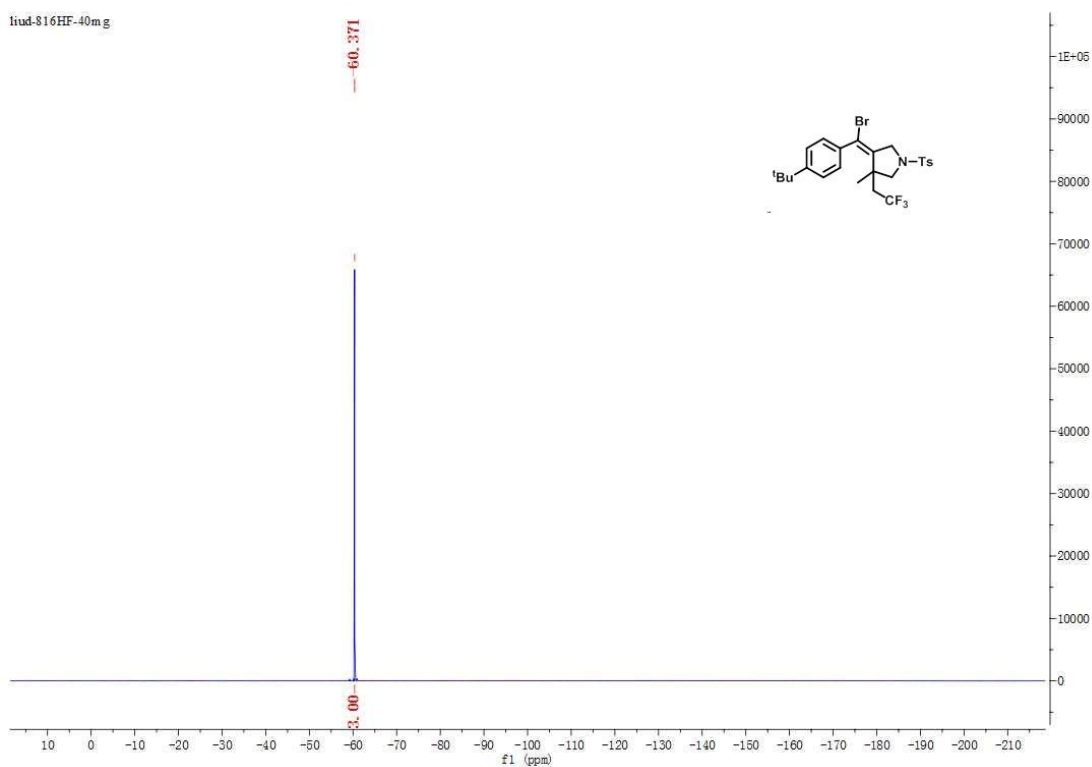

## 4. $^{13}\text{C}$ NMR

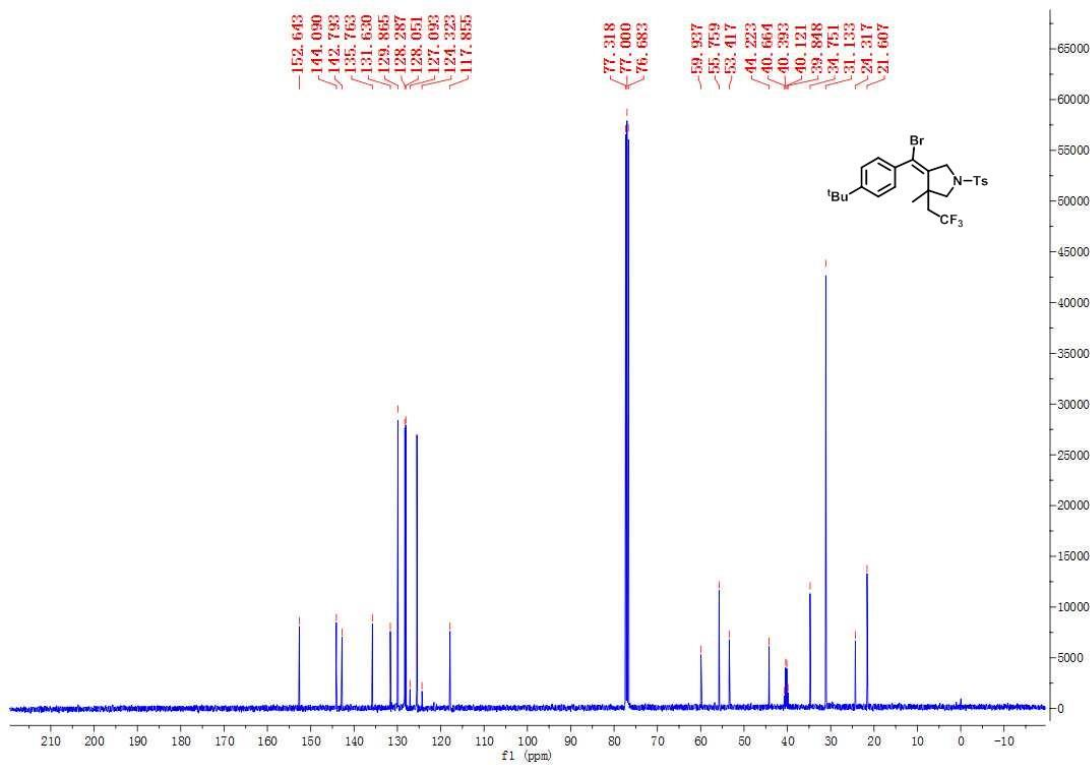

## 5. $^1\text{H}$ NMR

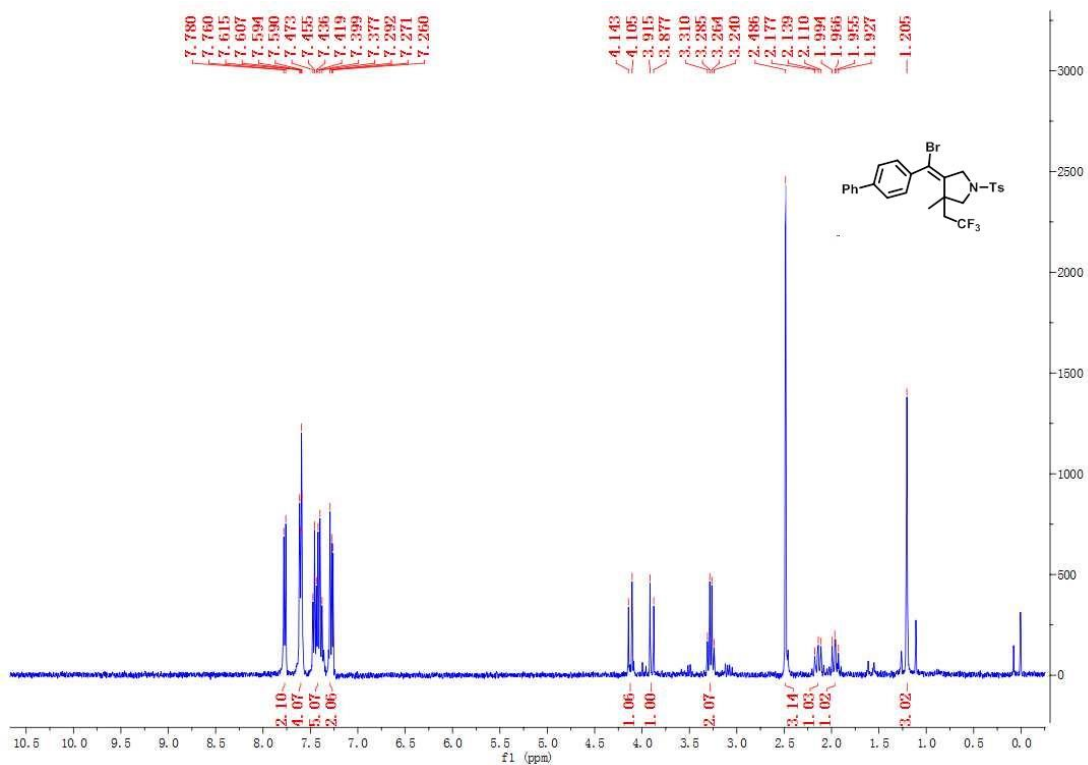

## 5. $^{19}\text{F}$ NMR

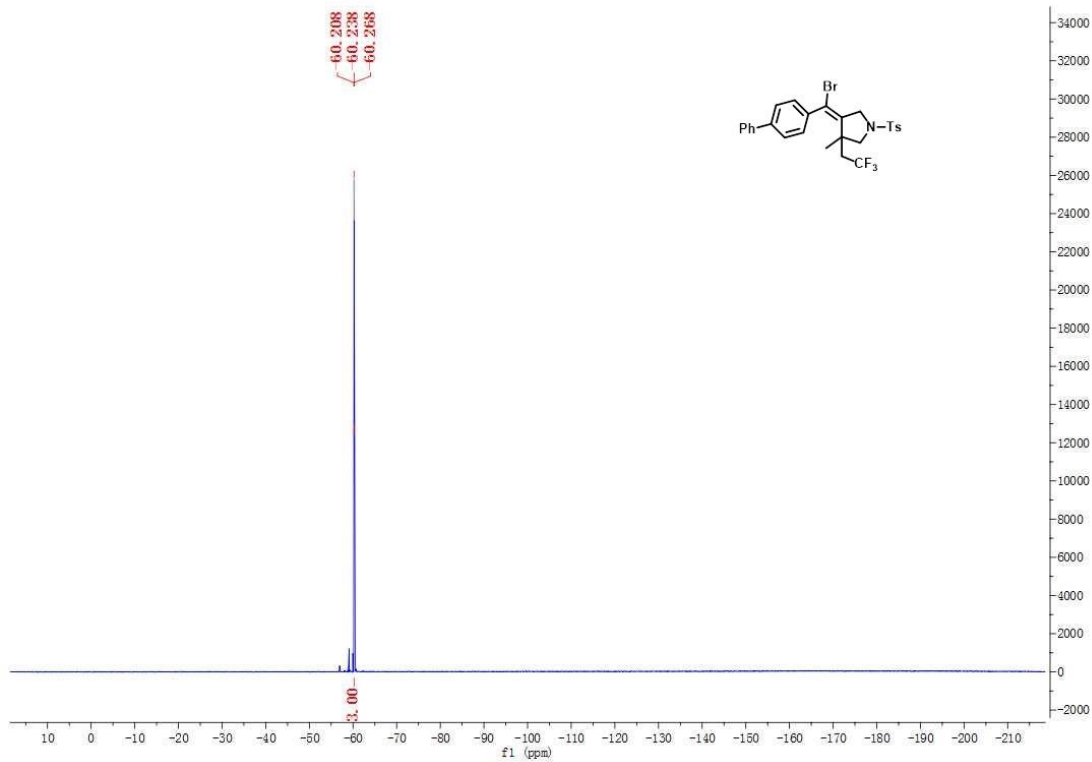

## 5. $^{13}\text{C}$ NMR

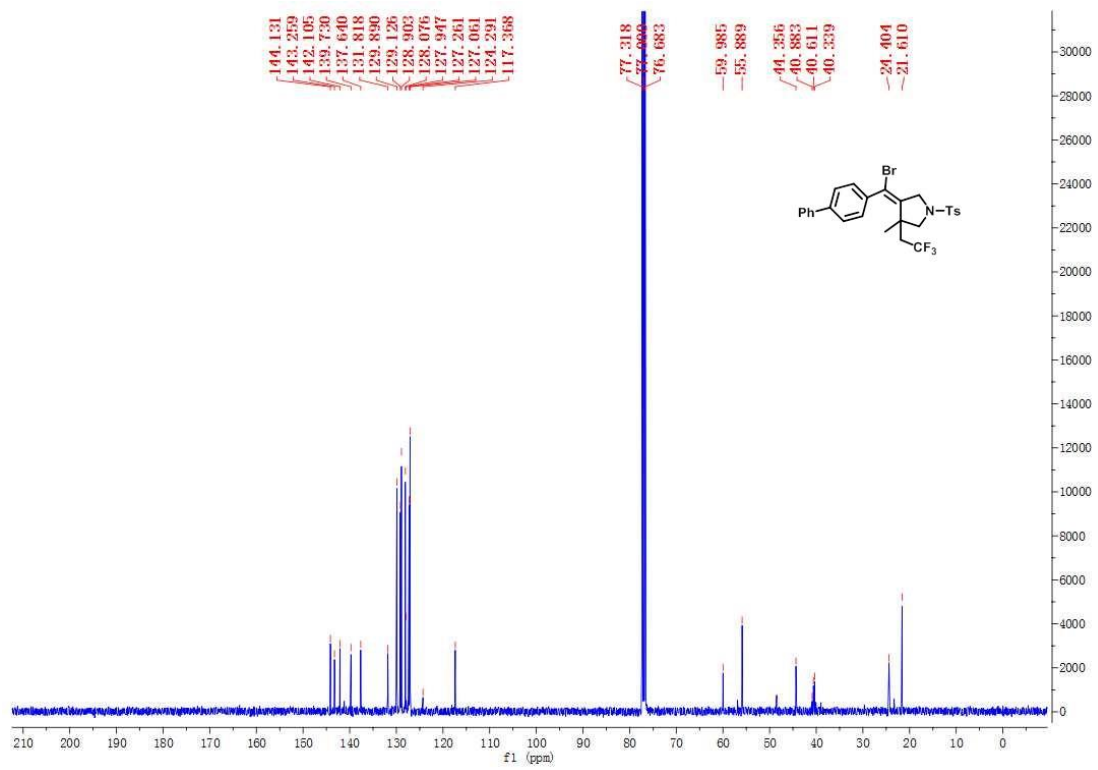

## 6. $^1\text{H}$ NMR

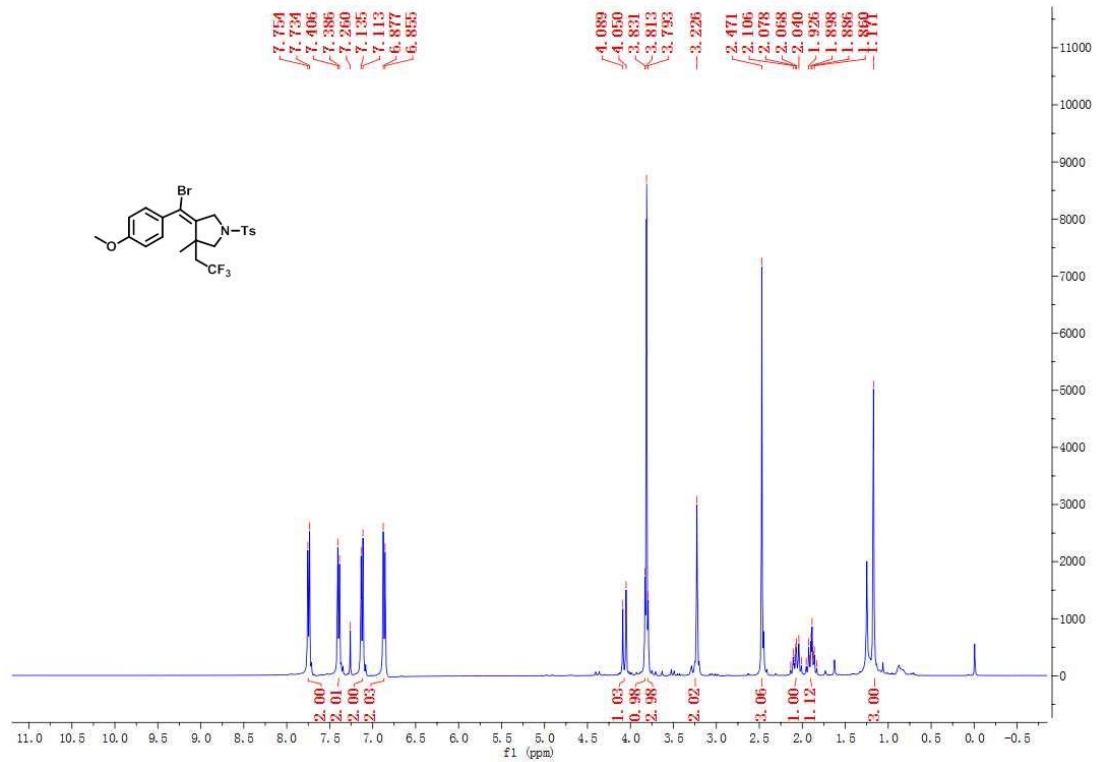

## 6. $^{19}\text{F}$ NMR

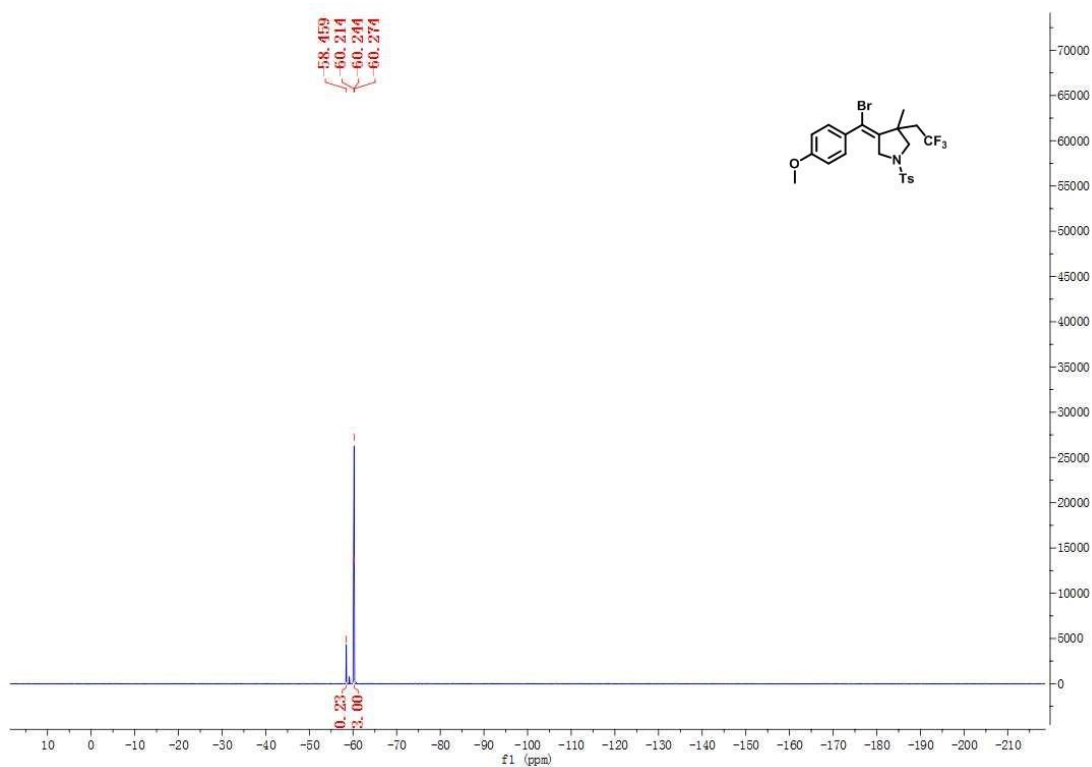

## 6. $^{13}\text{C}$ NMR

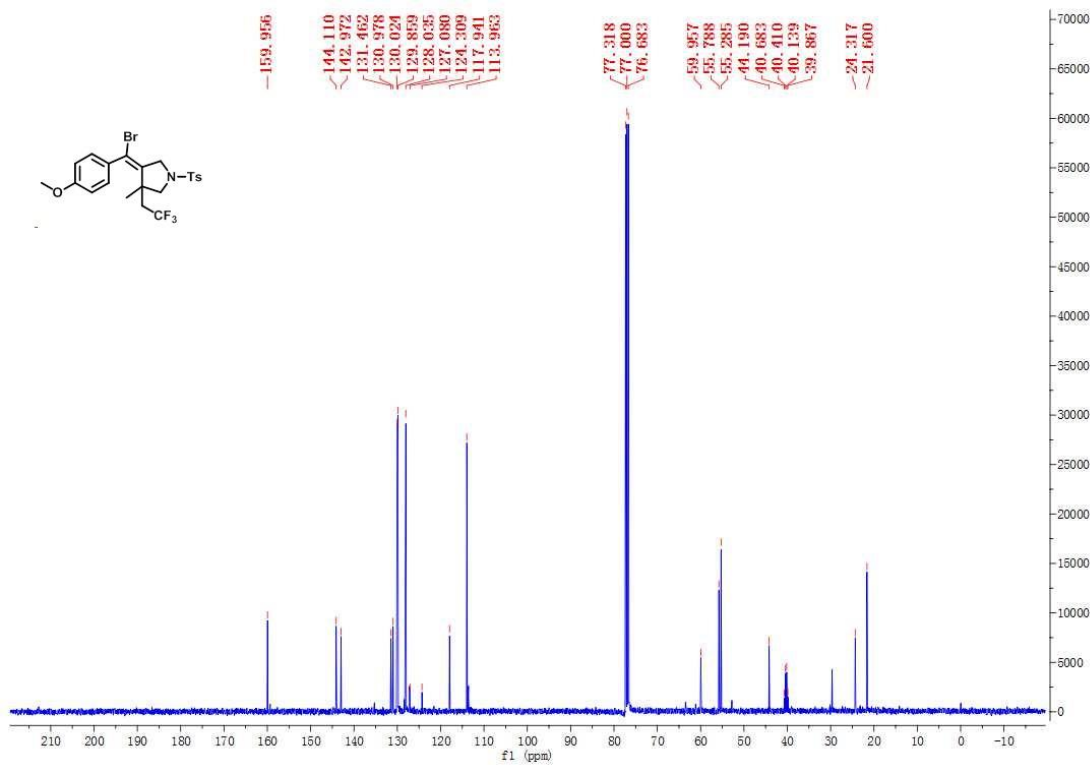

## 7. <sup>1</sup>H NMR

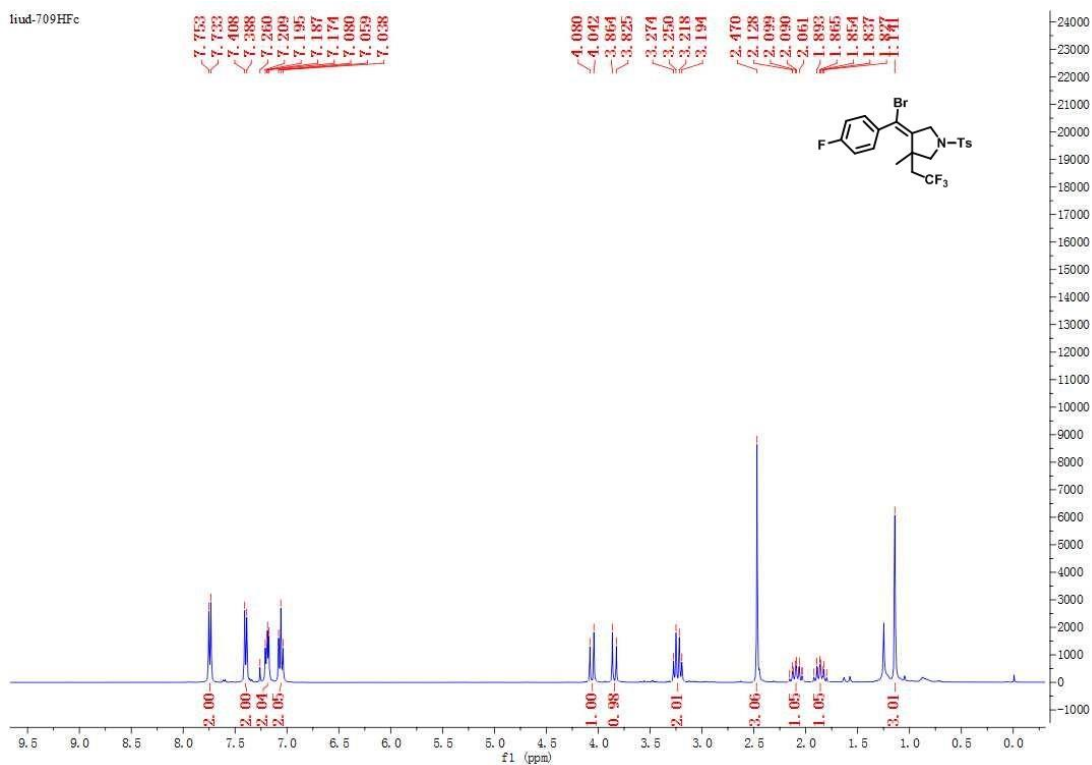

## 7. <sup>19</sup>F NMR

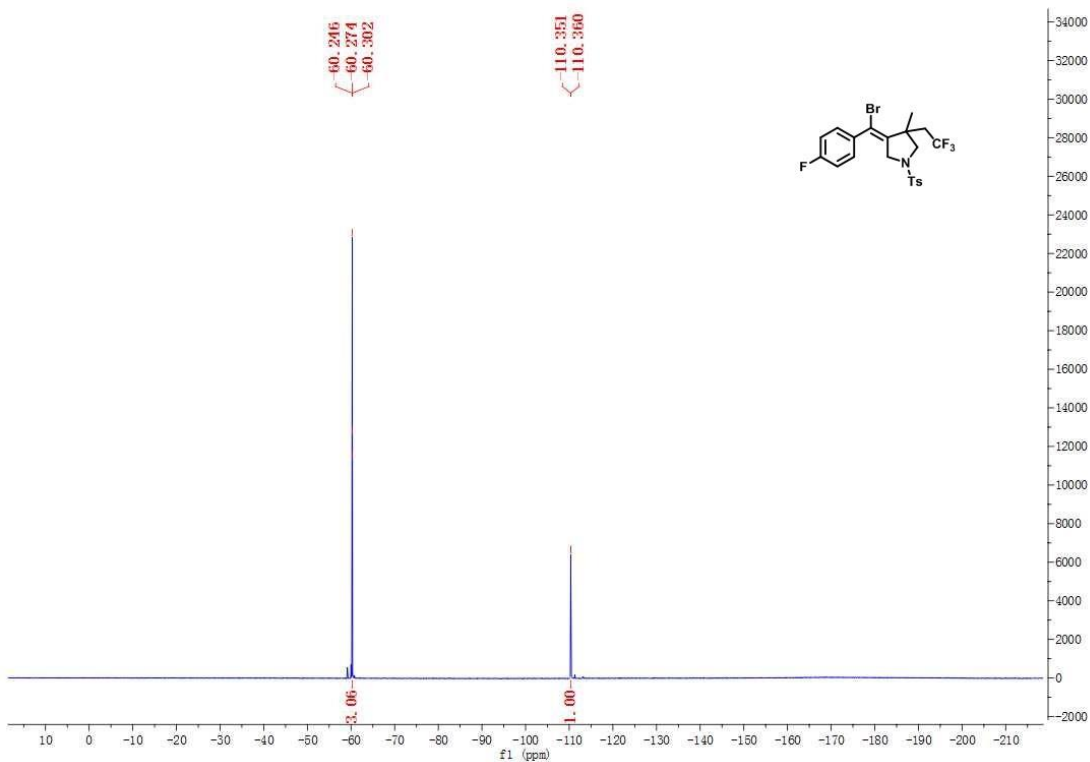



## 7. $^{13}\text{C}$ NMR

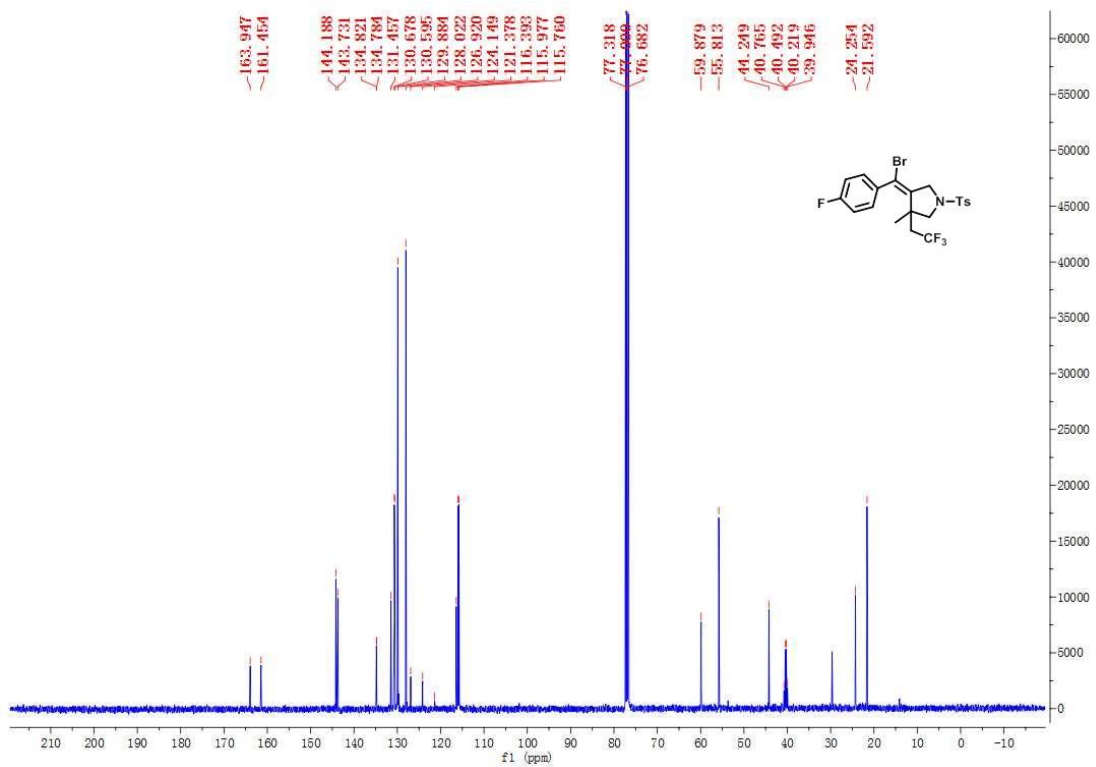

## 8. $^1\text{H}$ NMR

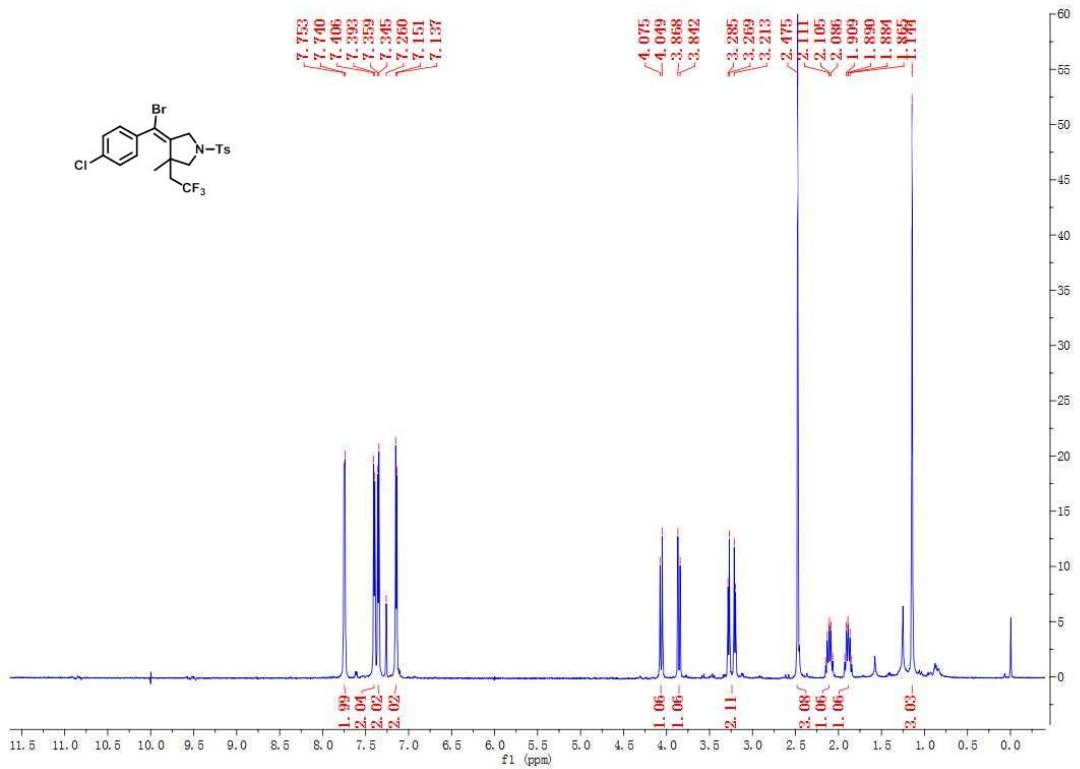

## 8. $^{19}\text{F}$ NMR

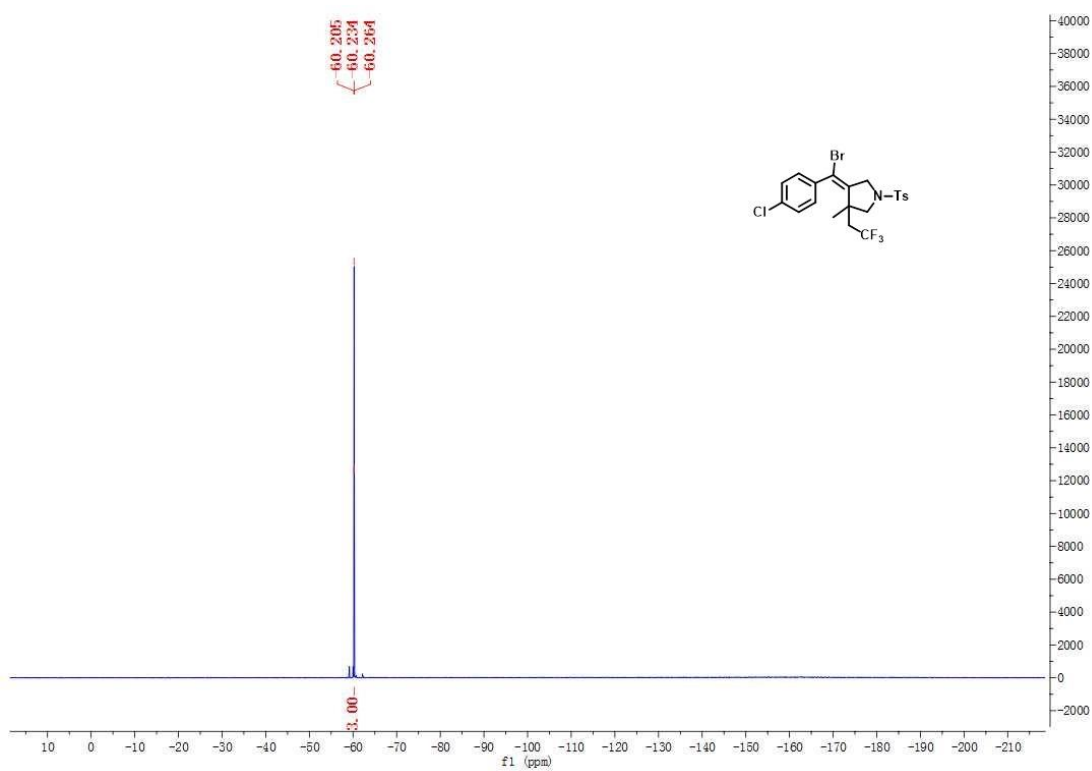

## 8. $^{13}\text{C}$ NMR

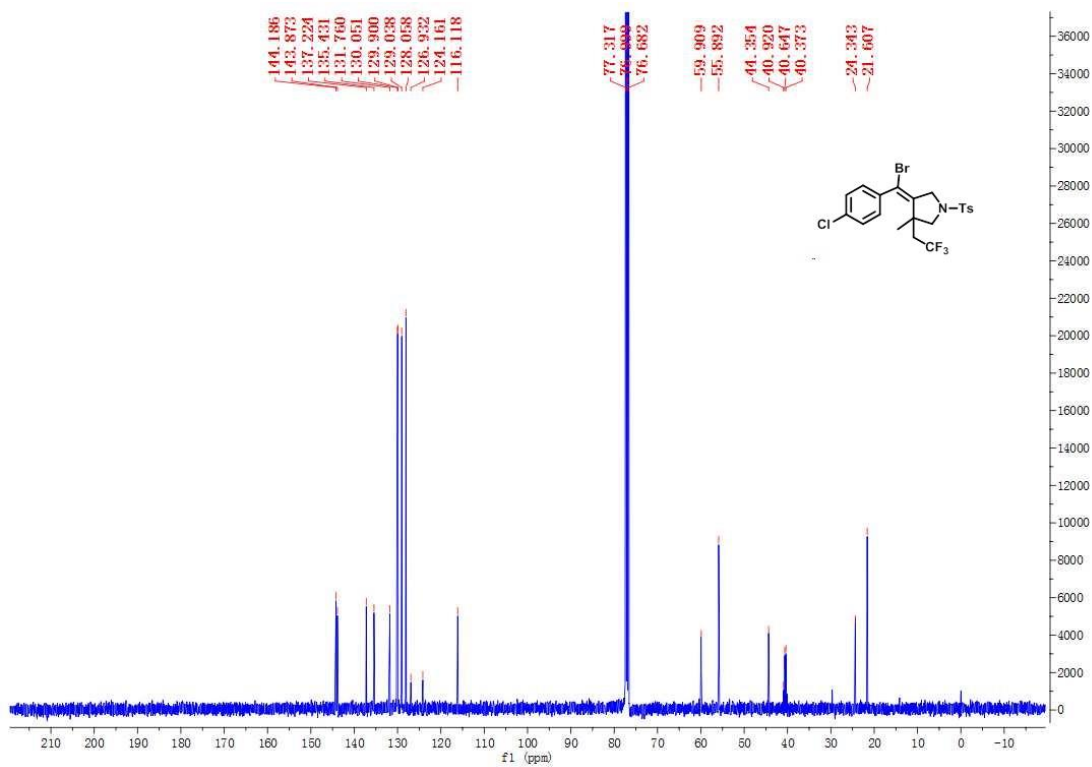

## 9. $^1\text{H}$ NMR

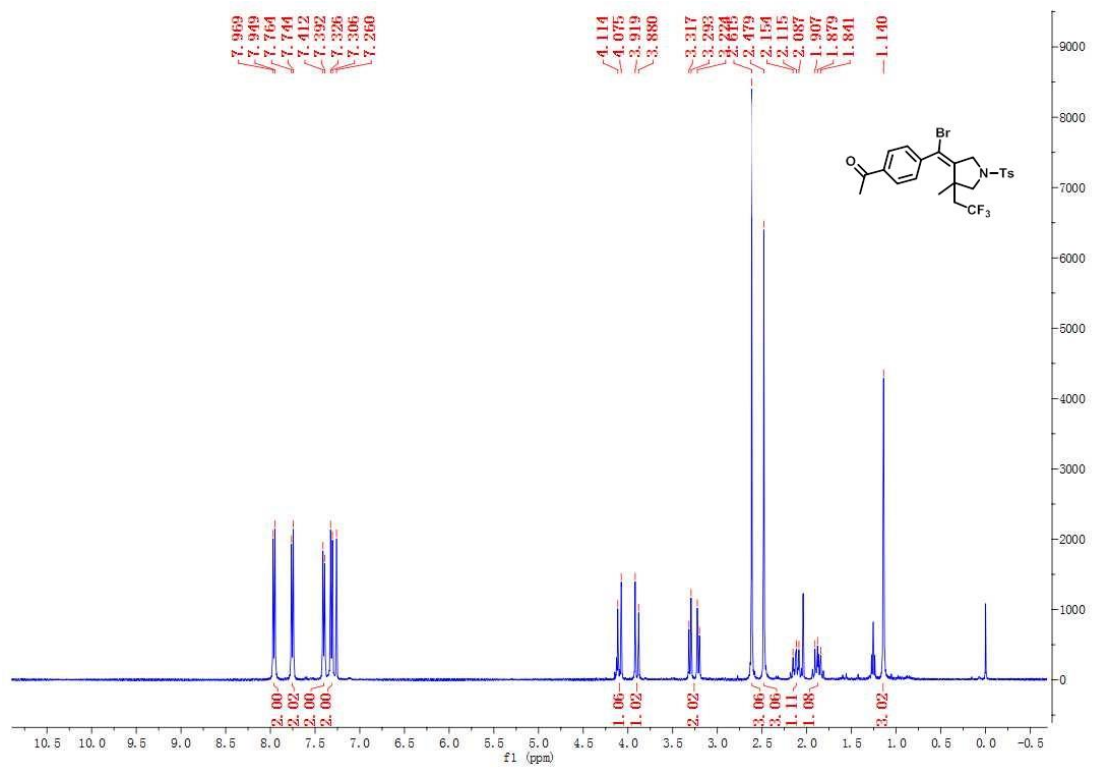

## 9. $^{19}\text{F}$ NMR

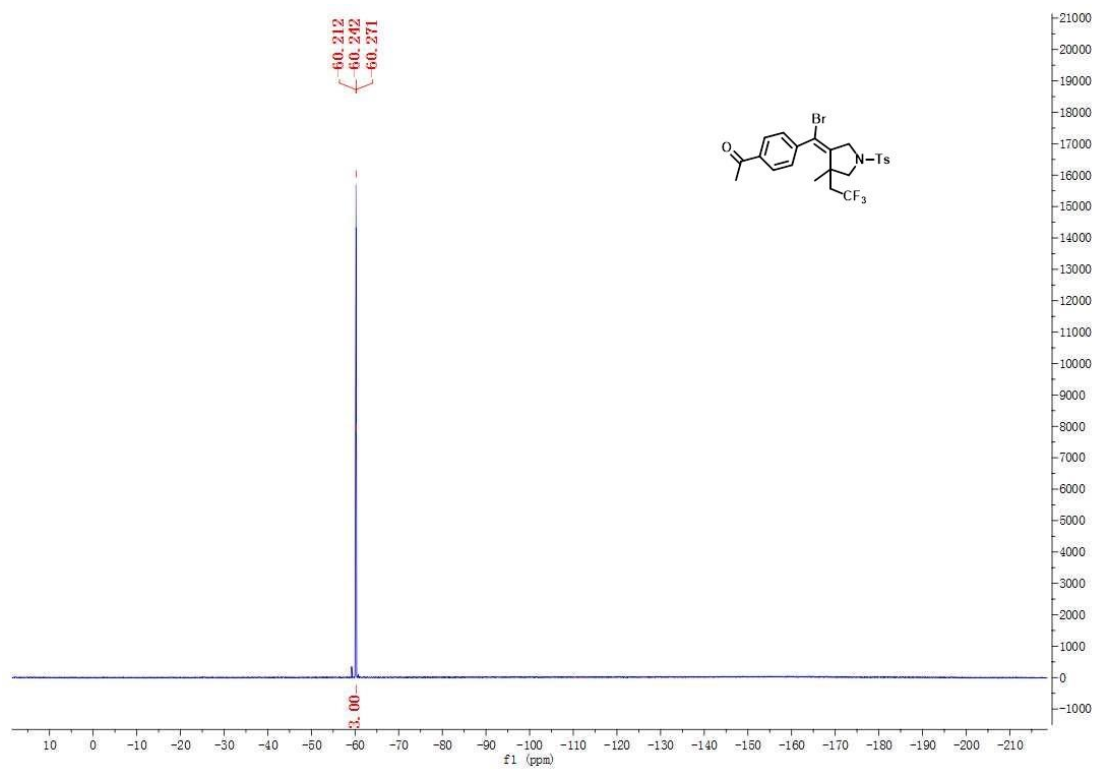

### 9. $^{13}\text{C}$ NMR

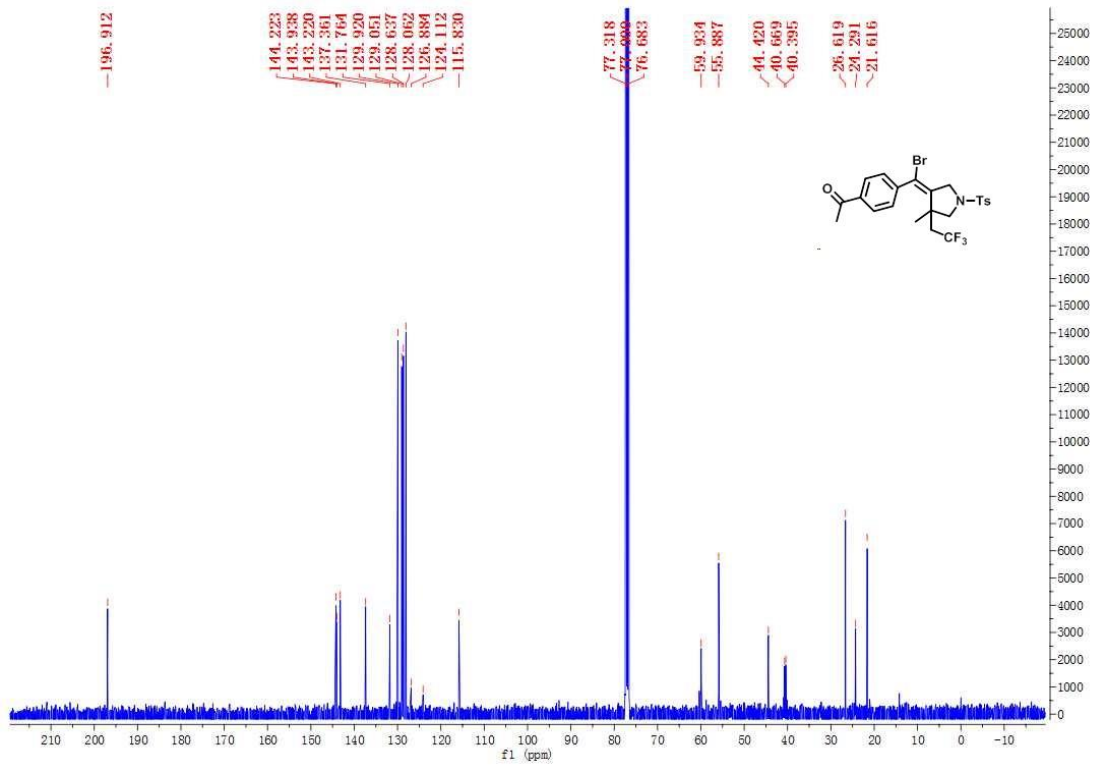

### 10. $^1\text{H}$ NMR

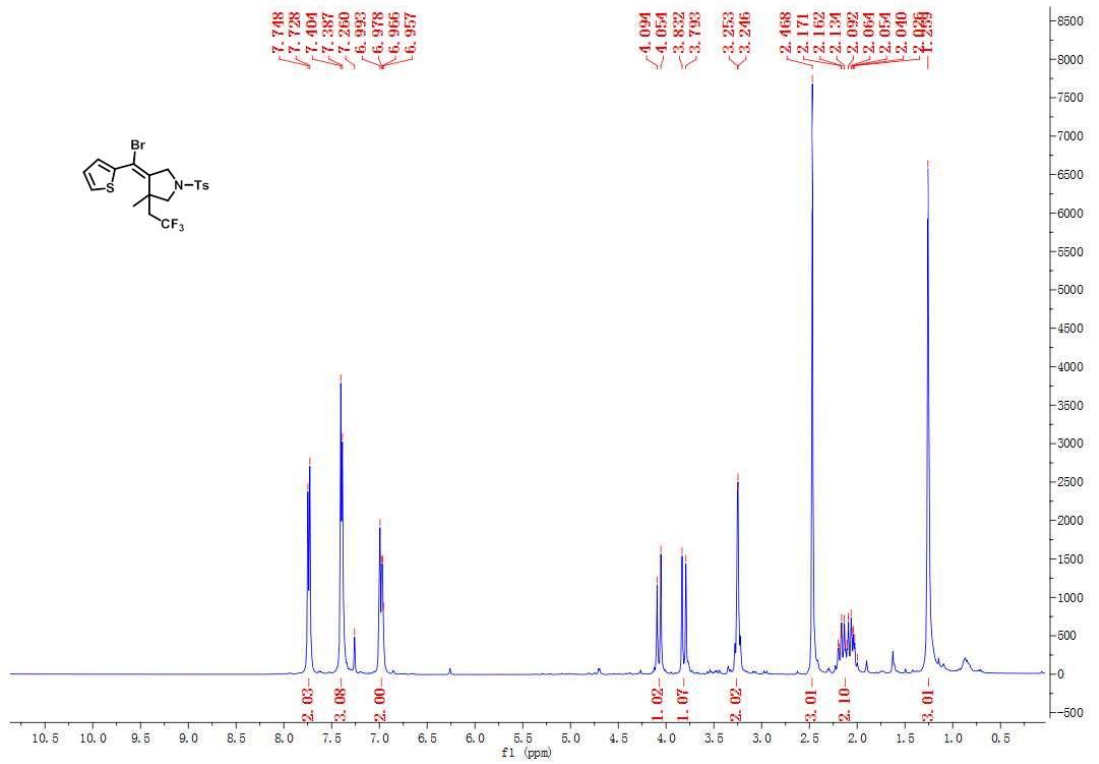

### 10. <sup>19</sup>F NMR

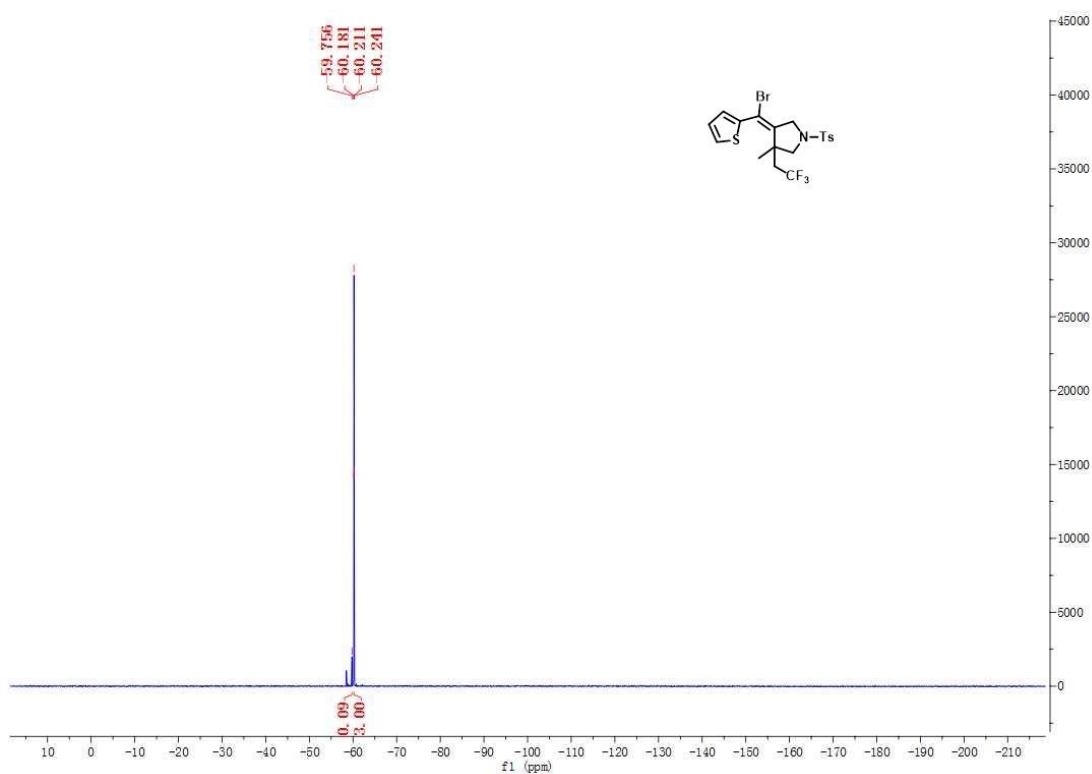

### 10. <sup>13</sup>C NMR

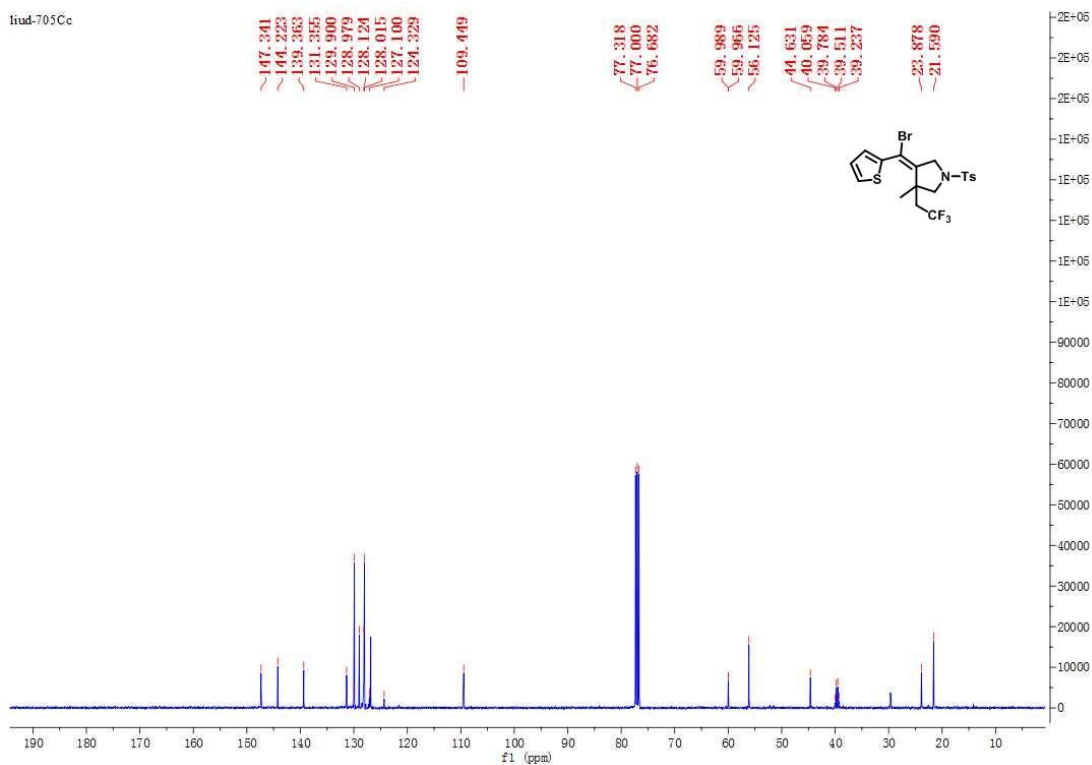

### 11. <sup>1</sup>H NMR

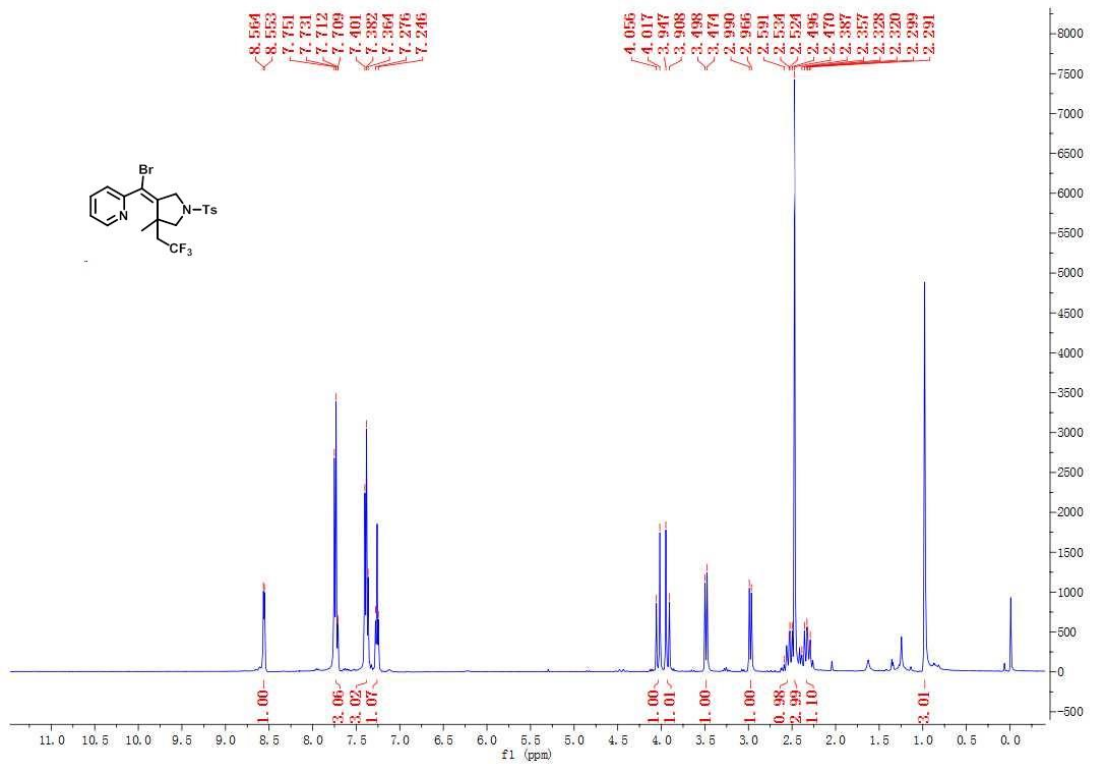

### 11. <sup>19</sup>F NMR

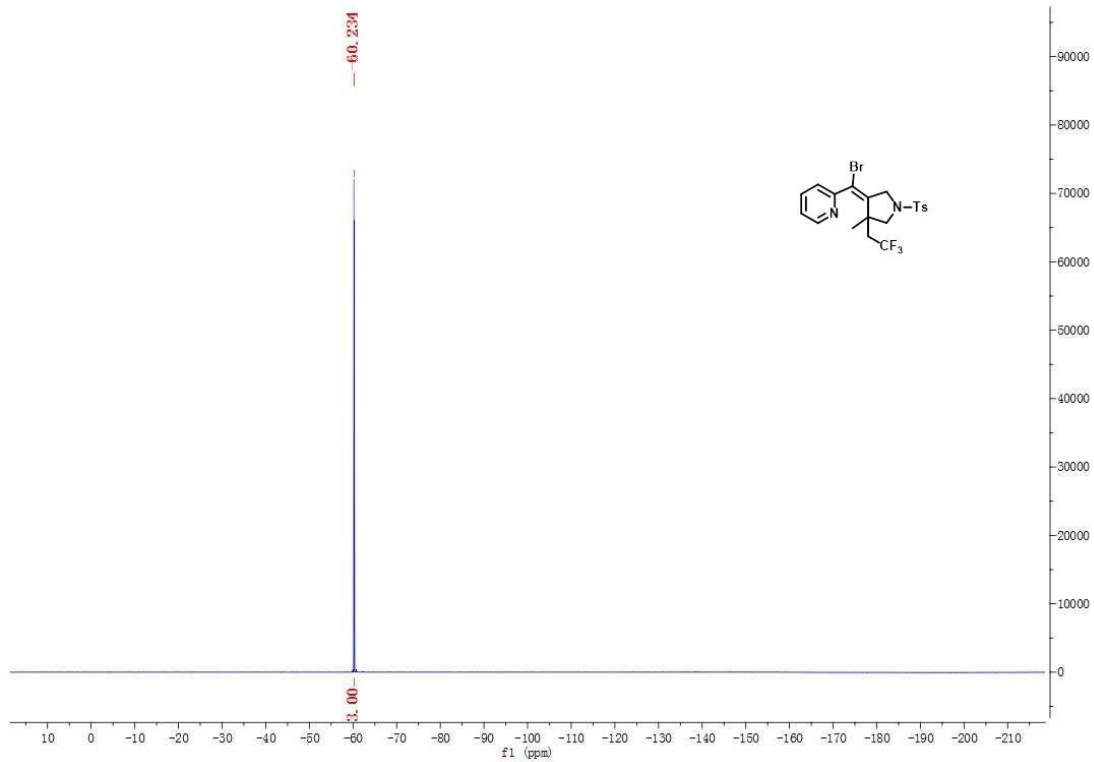

### 11. <sup>13</sup>C NMR

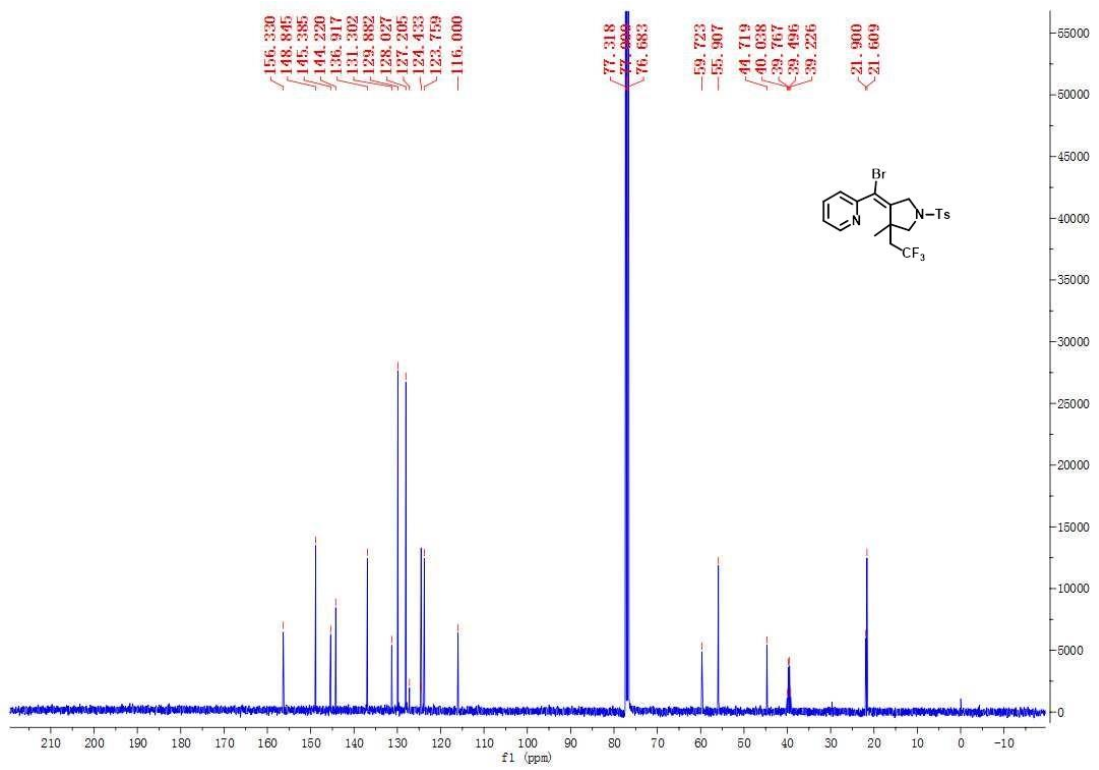

### 12. <sup>1</sup>H NMR

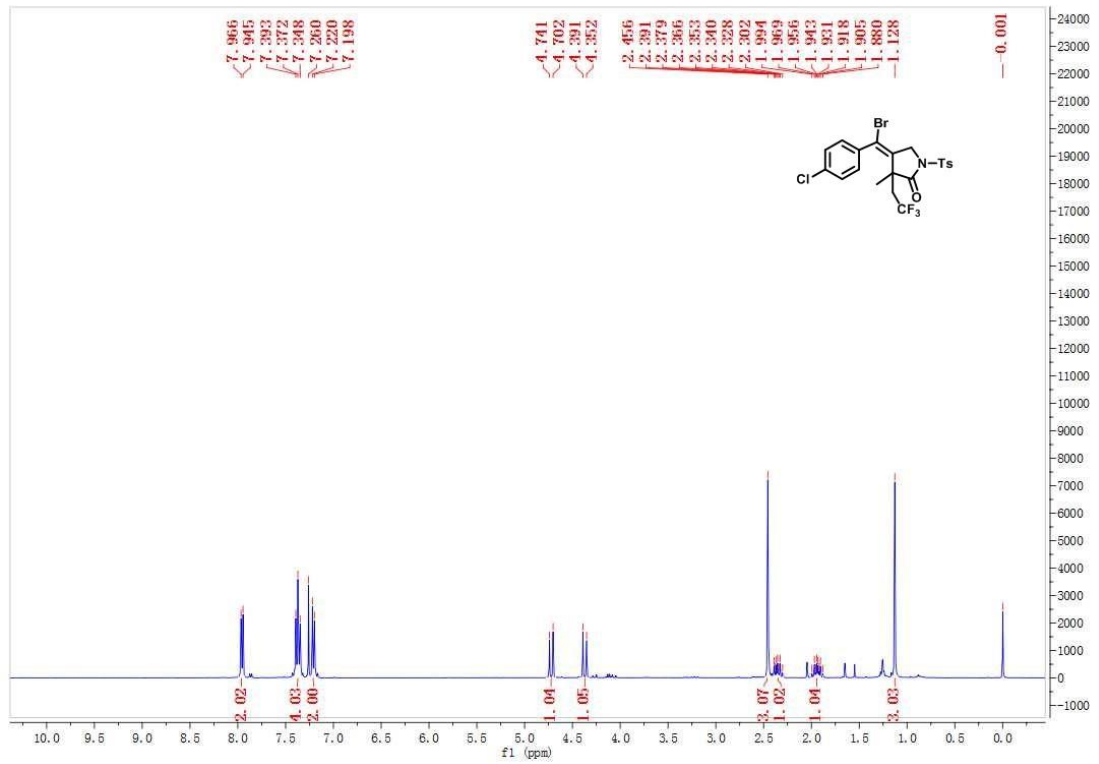

## 12. <sup>19</sup>F NMR

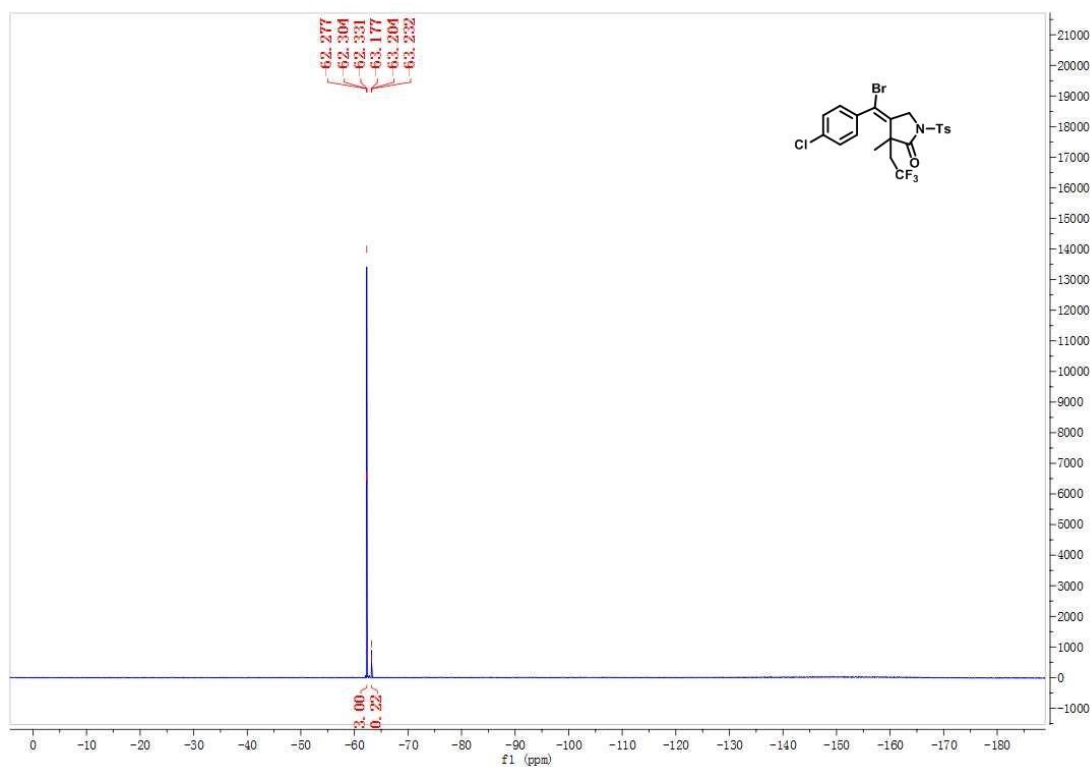

## 12. <sup>13</sup>C NMR

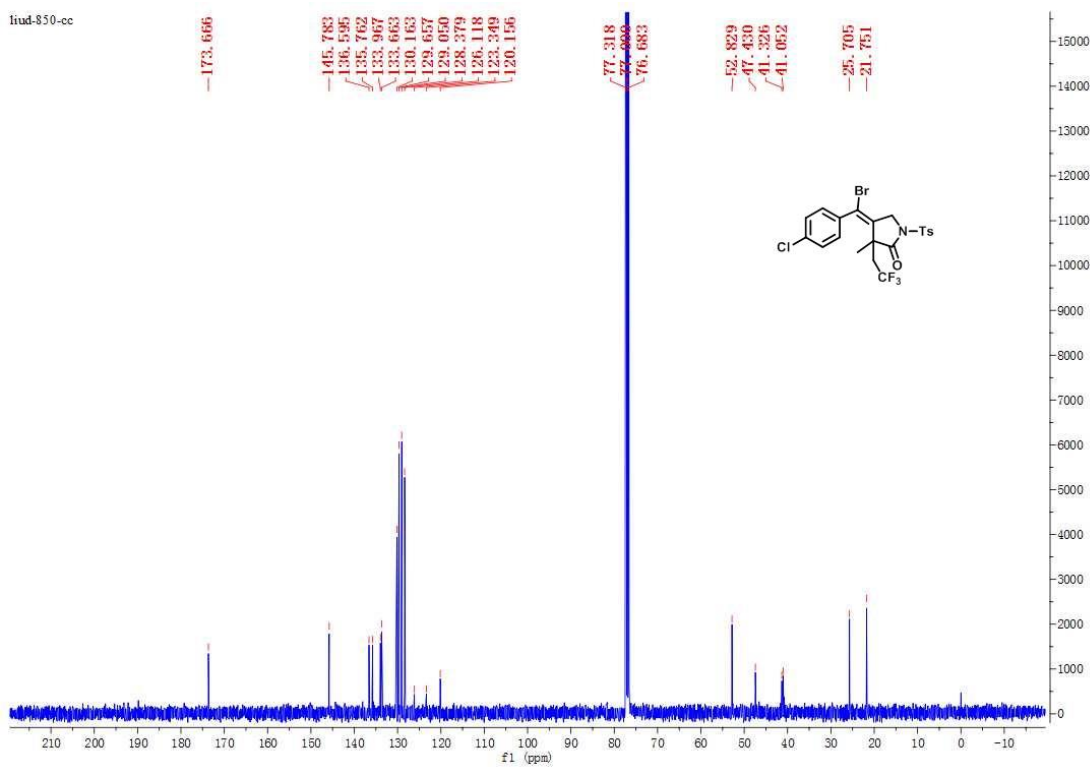



### 13. <sup>1</sup>H NMR

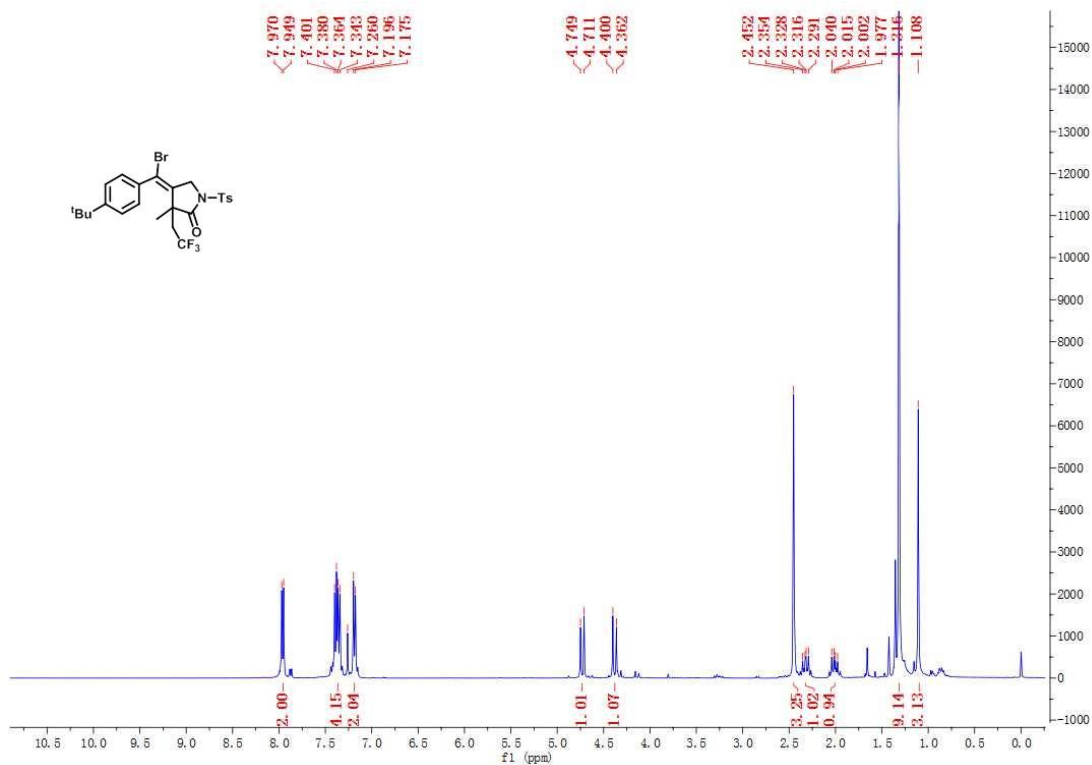

### 13. <sup>19</sup>F NMR

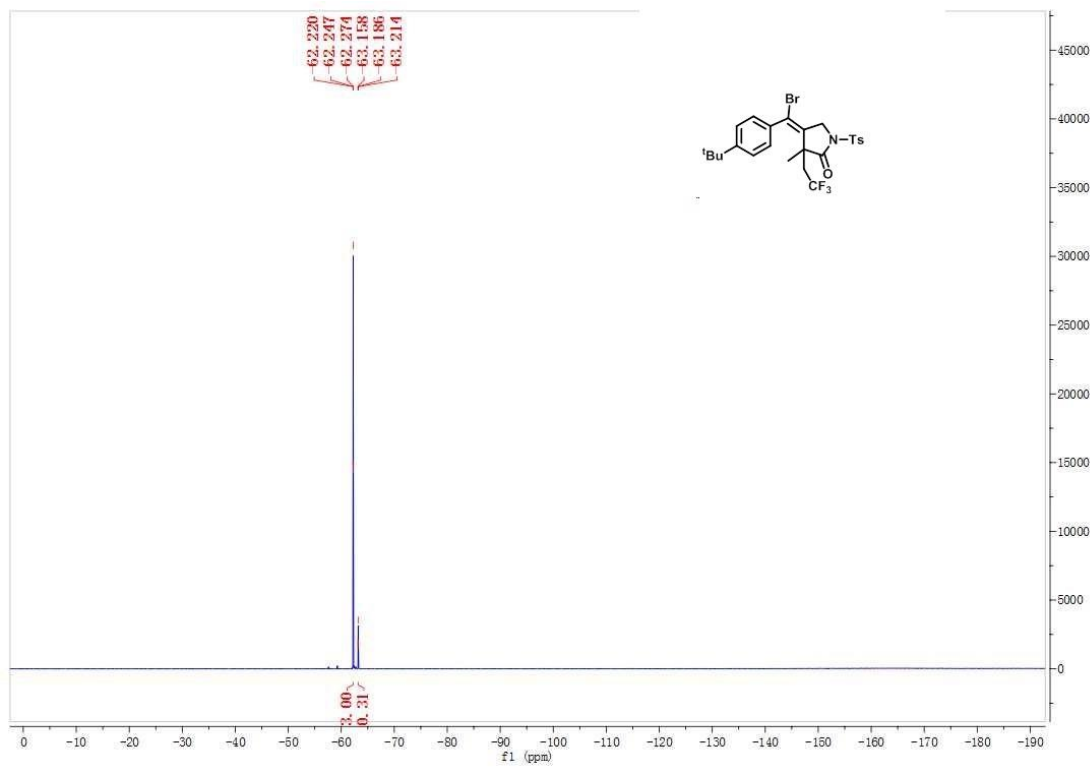

### 13. <sup>13</sup>C NMR

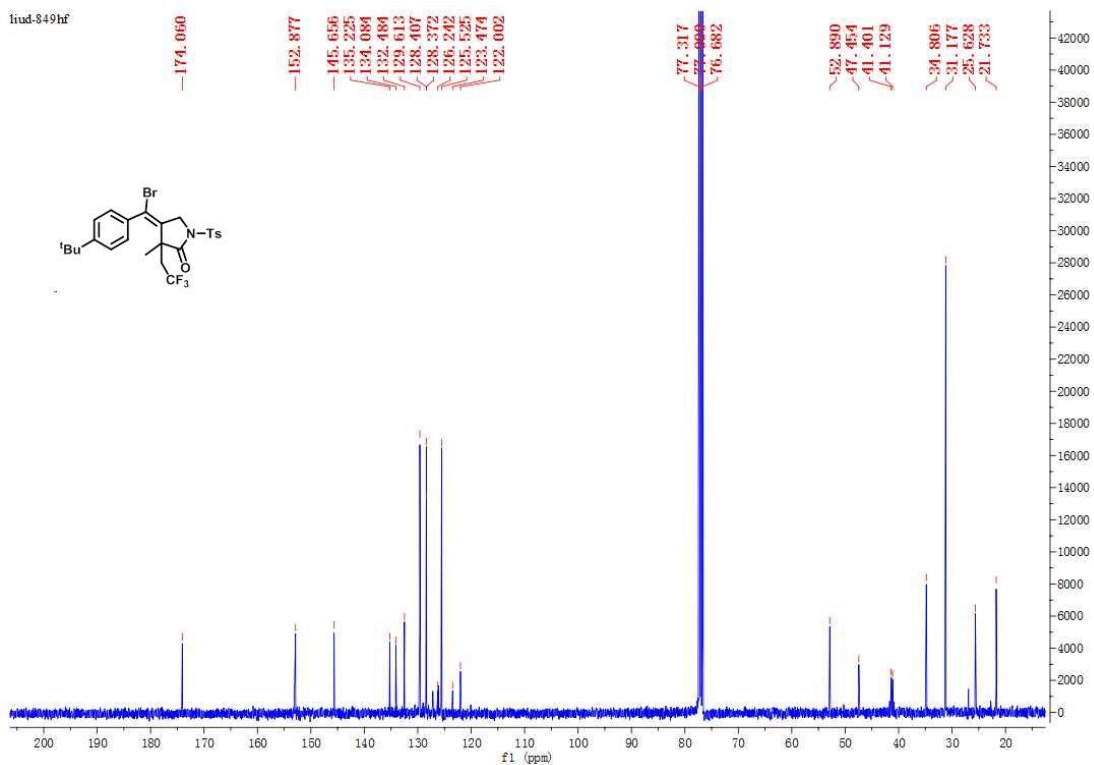

### 14. <sup>1</sup>H NMR

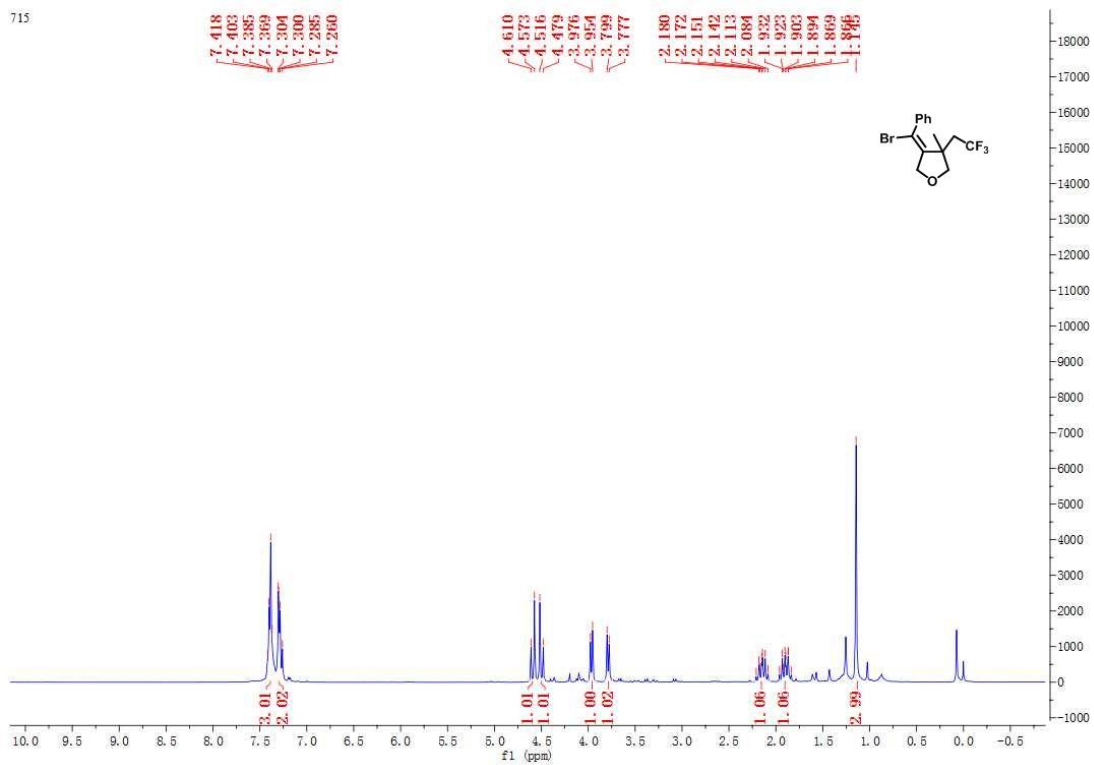

### 14. <sup>19</sup>F NMR

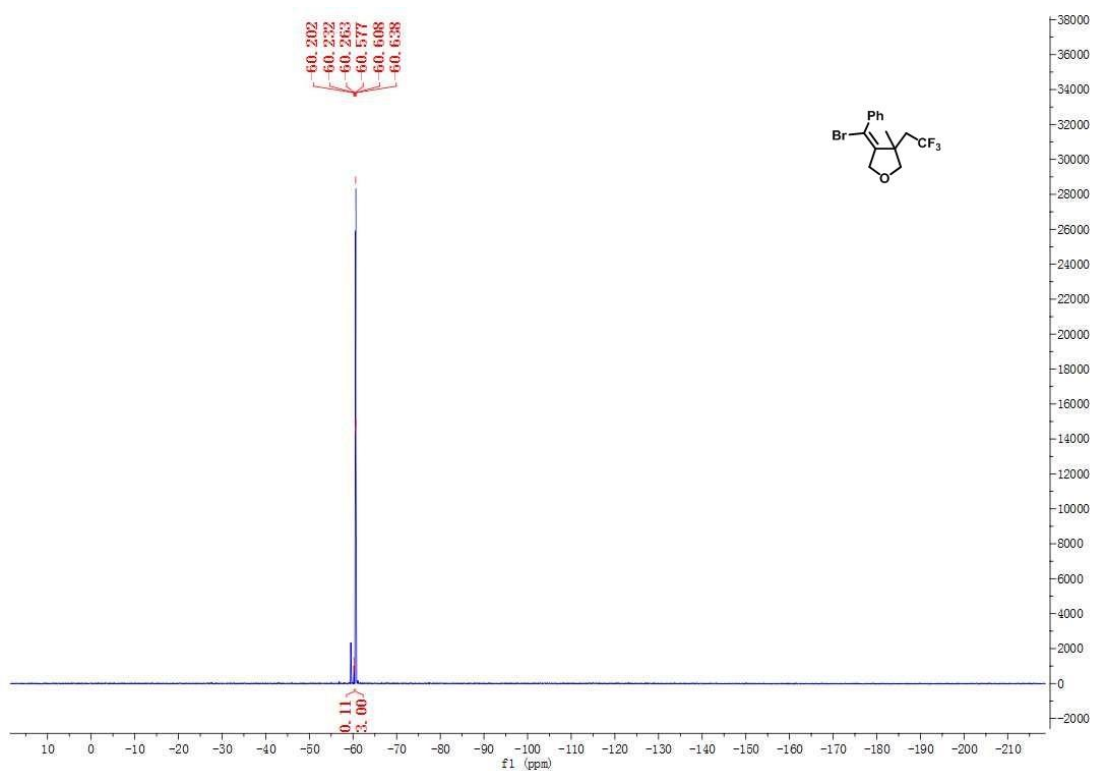

### 14. <sup>13</sup>C NMR

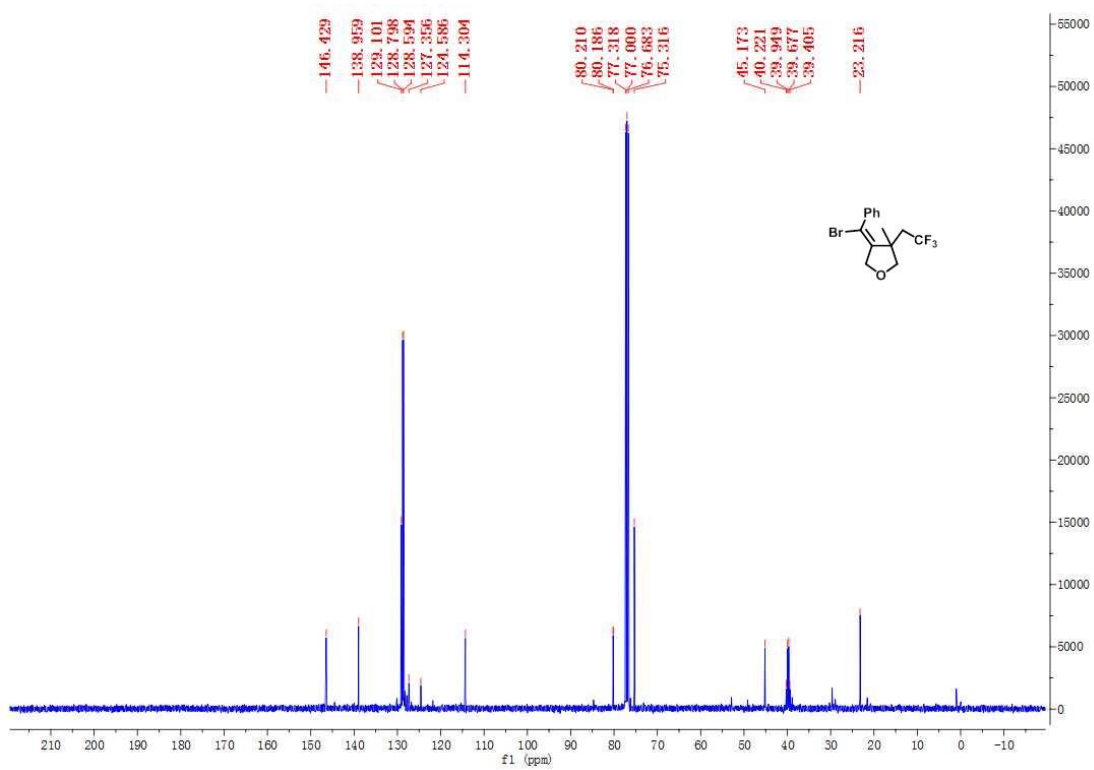

### 15. <sup>1</sup>H NMR

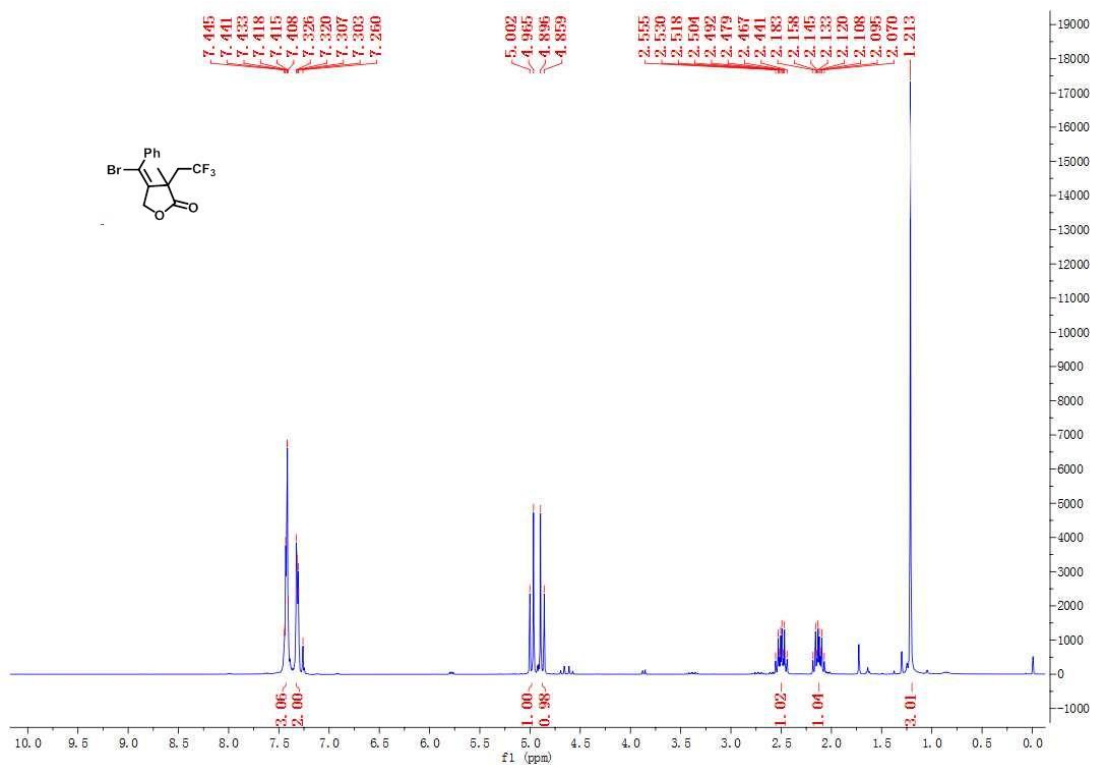

### 15. <sup>19</sup>F NMR

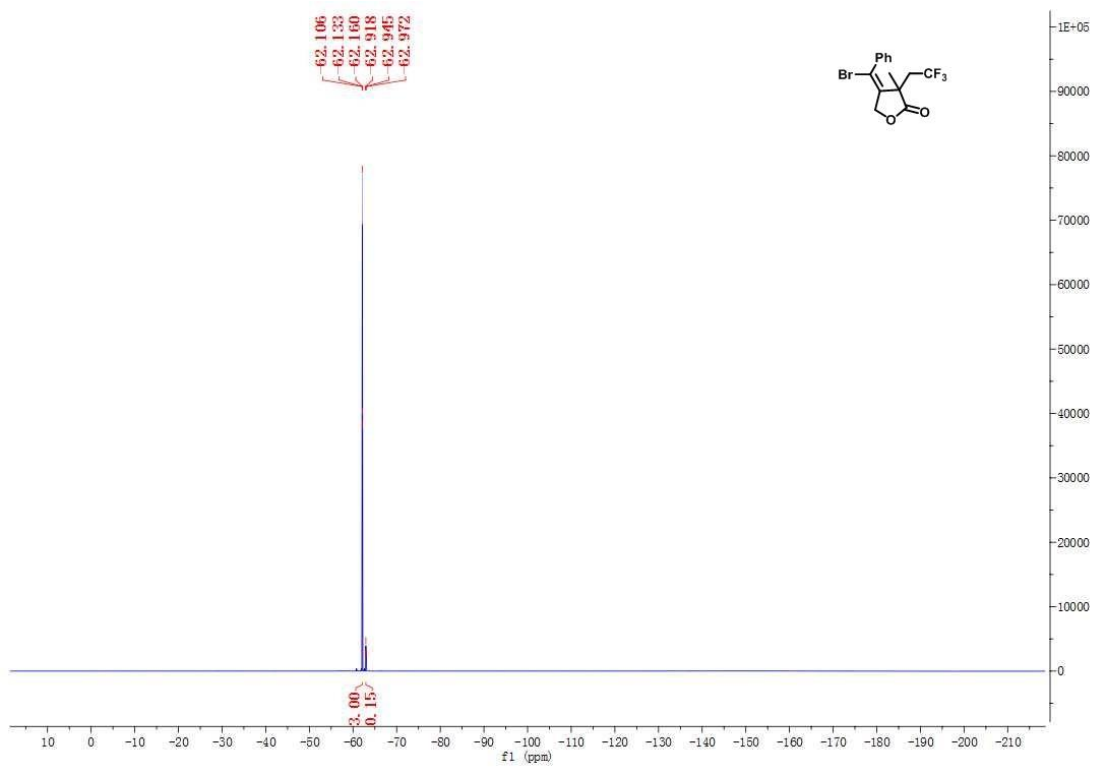

### 15. <sup>13</sup>C NMR

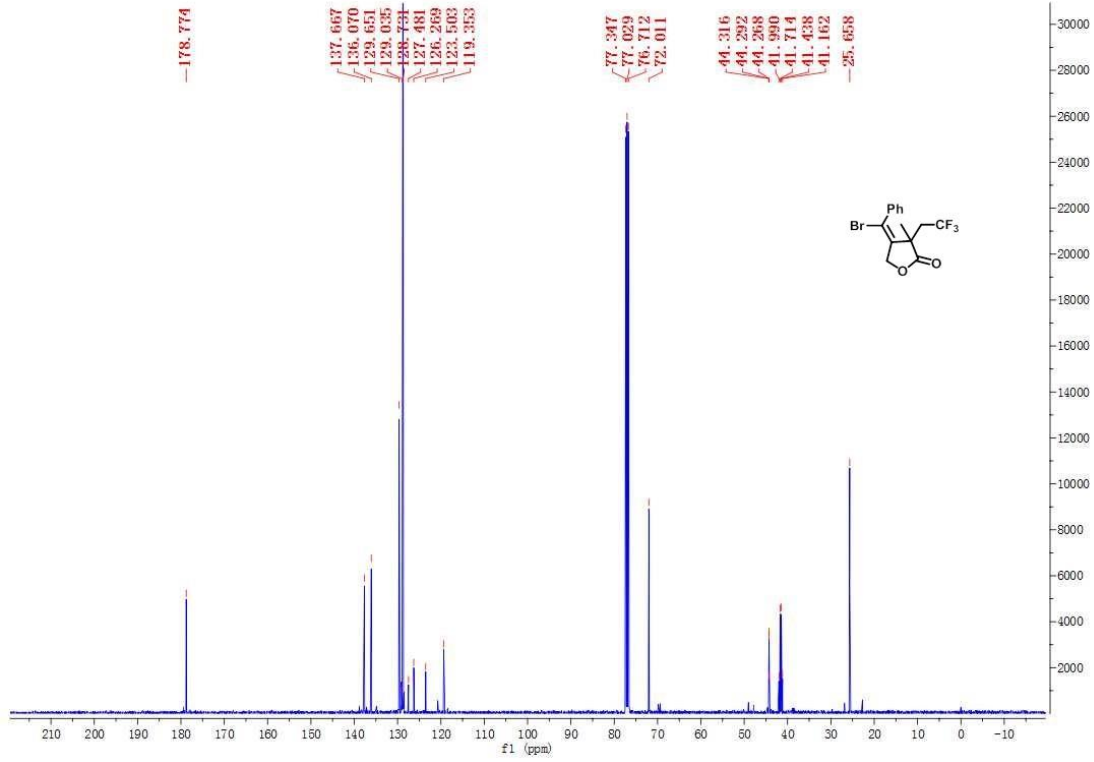

### 16. <sup>1</sup>H NMR

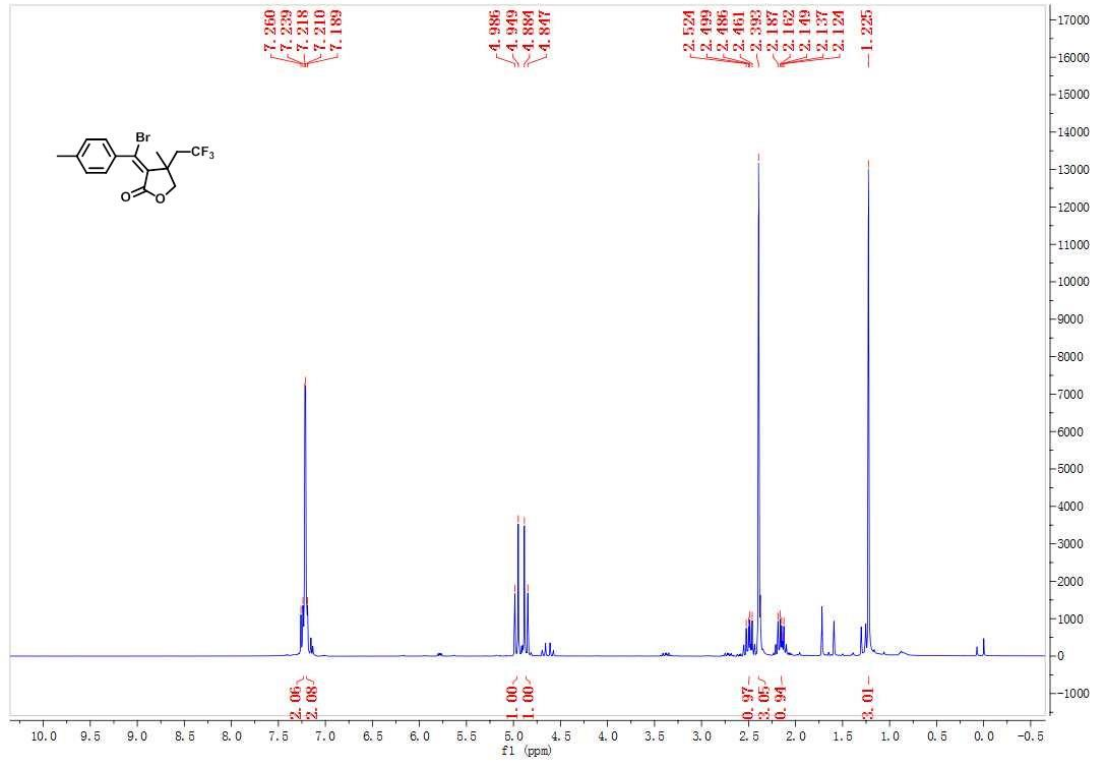

### 16. <sup>19</sup>F NMR

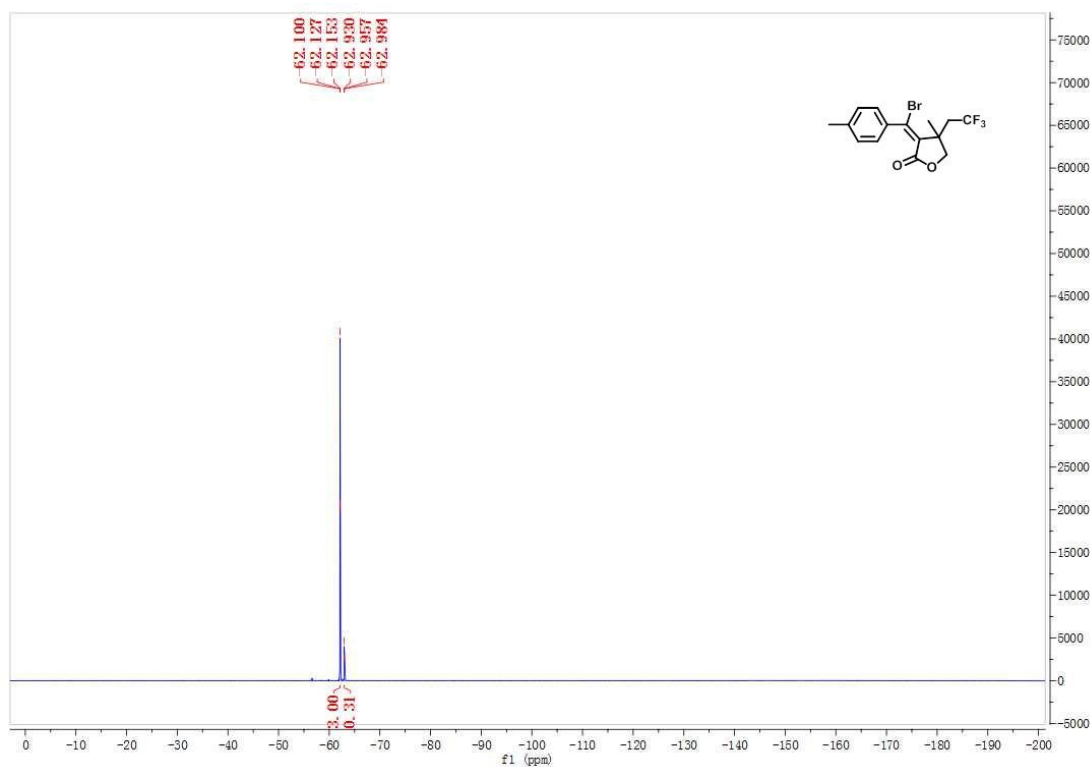

### 16. <sup>13</sup>C NMR

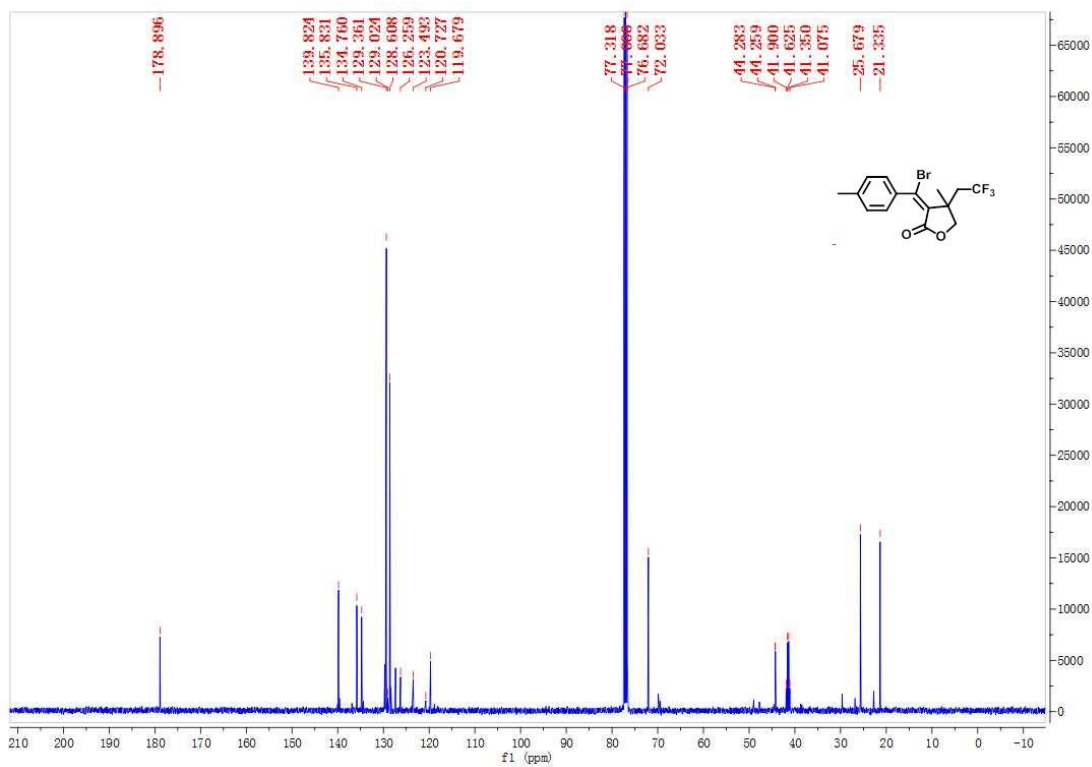

### 17 <sup>1</sup>H NMR

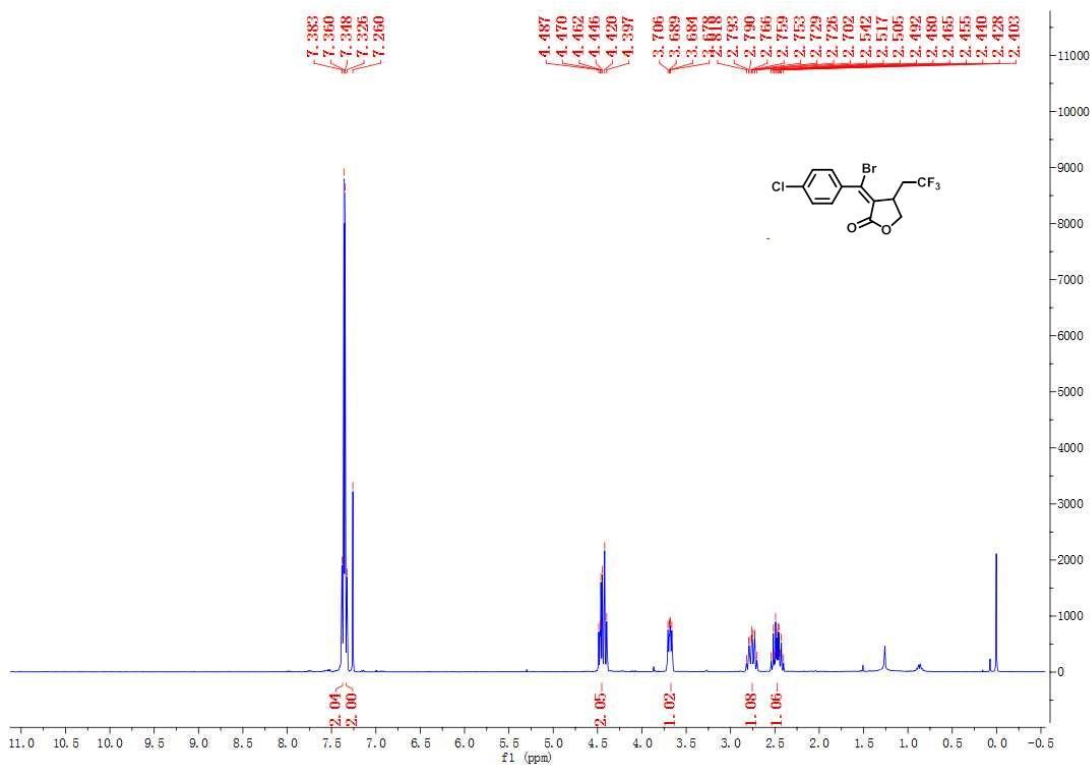

### 17 <sup>19</sup>F NMR

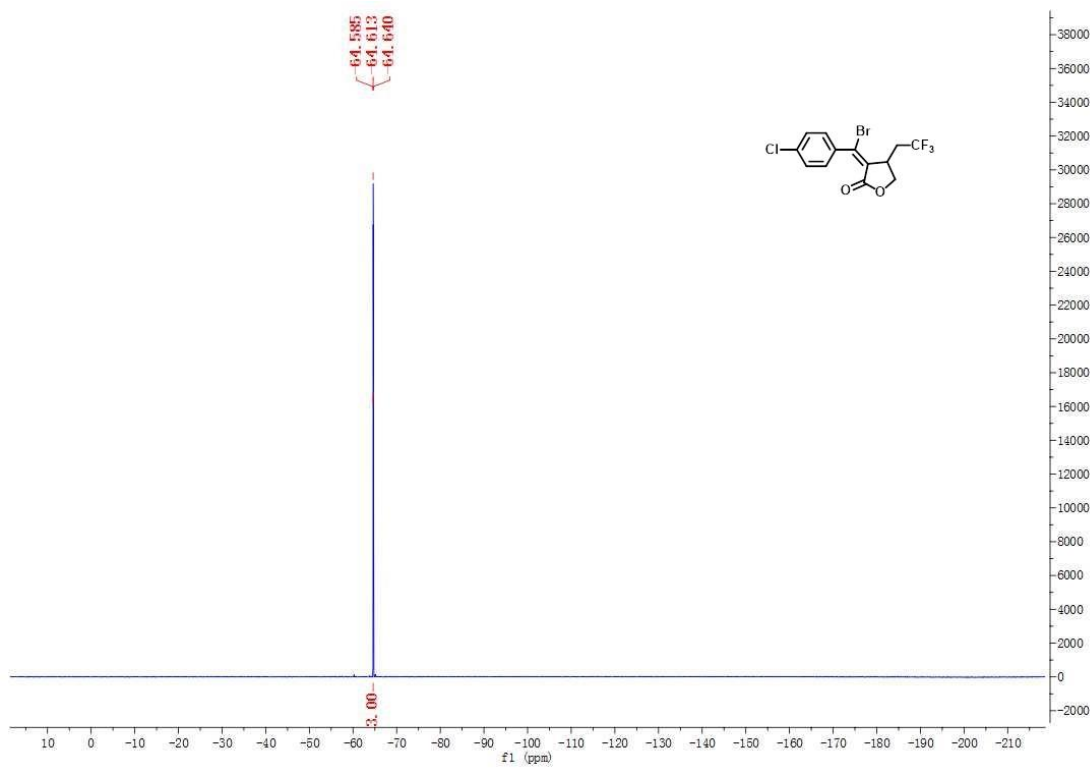

### 17 <sup>13</sup>C NMR

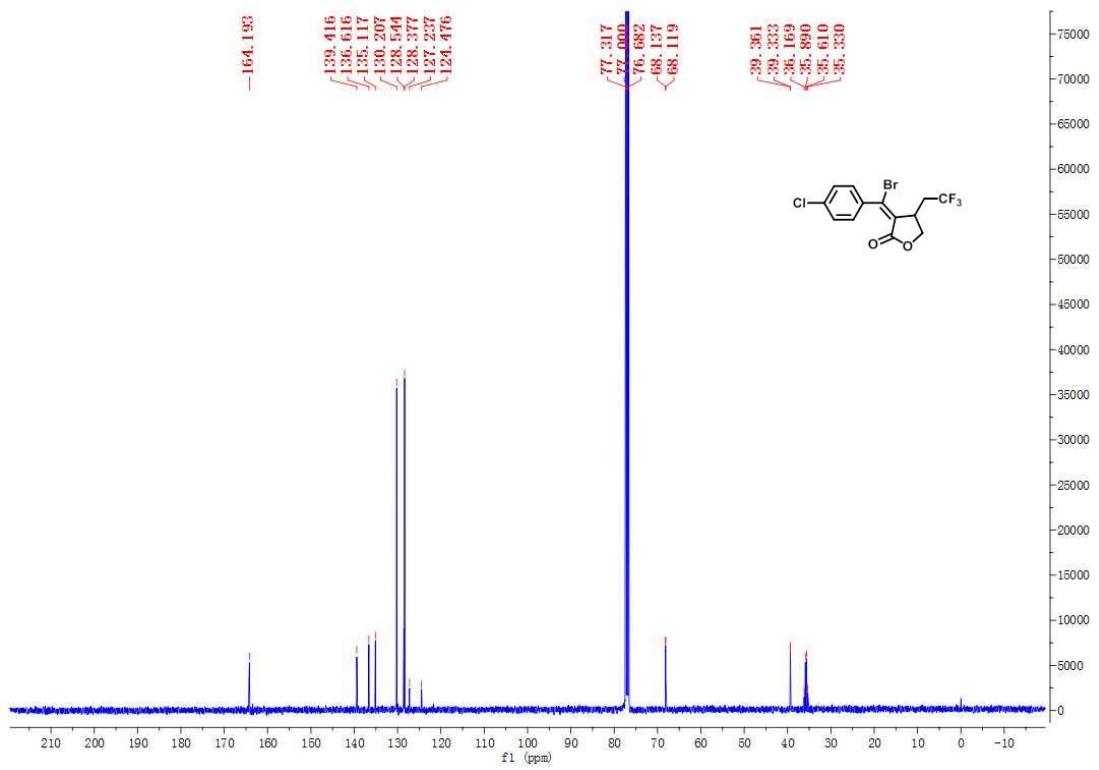

### 18. <sup>1</sup>H NMR

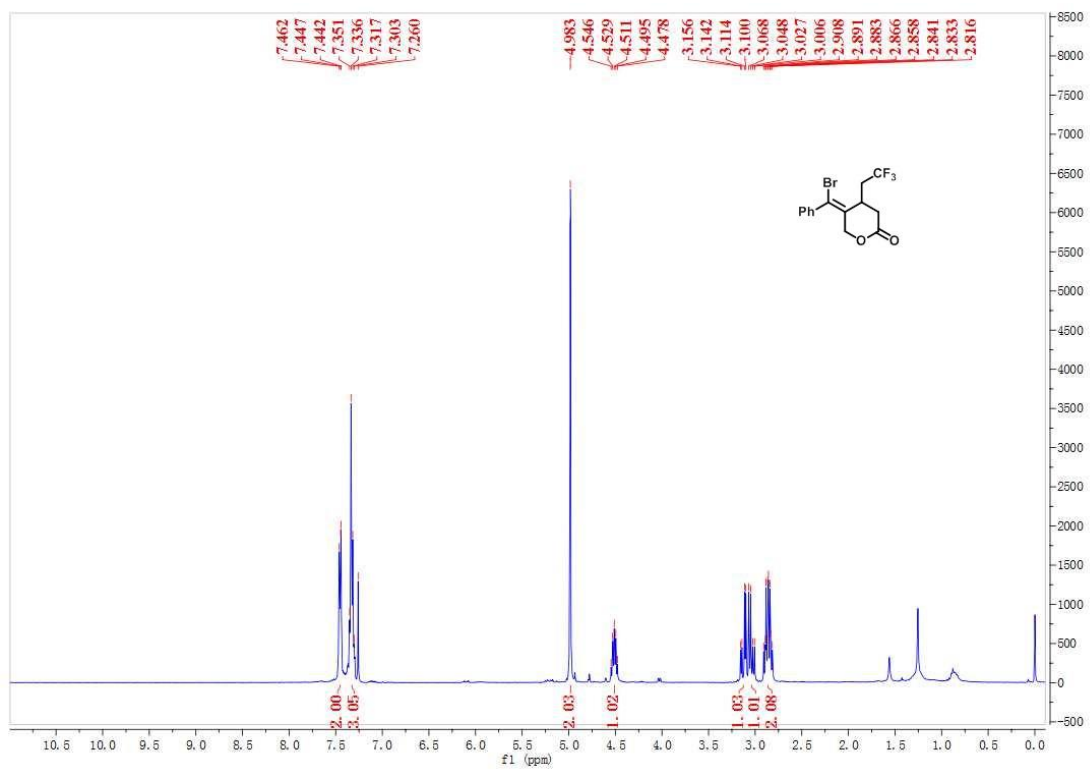



### 18. <sup>19</sup>F NMR

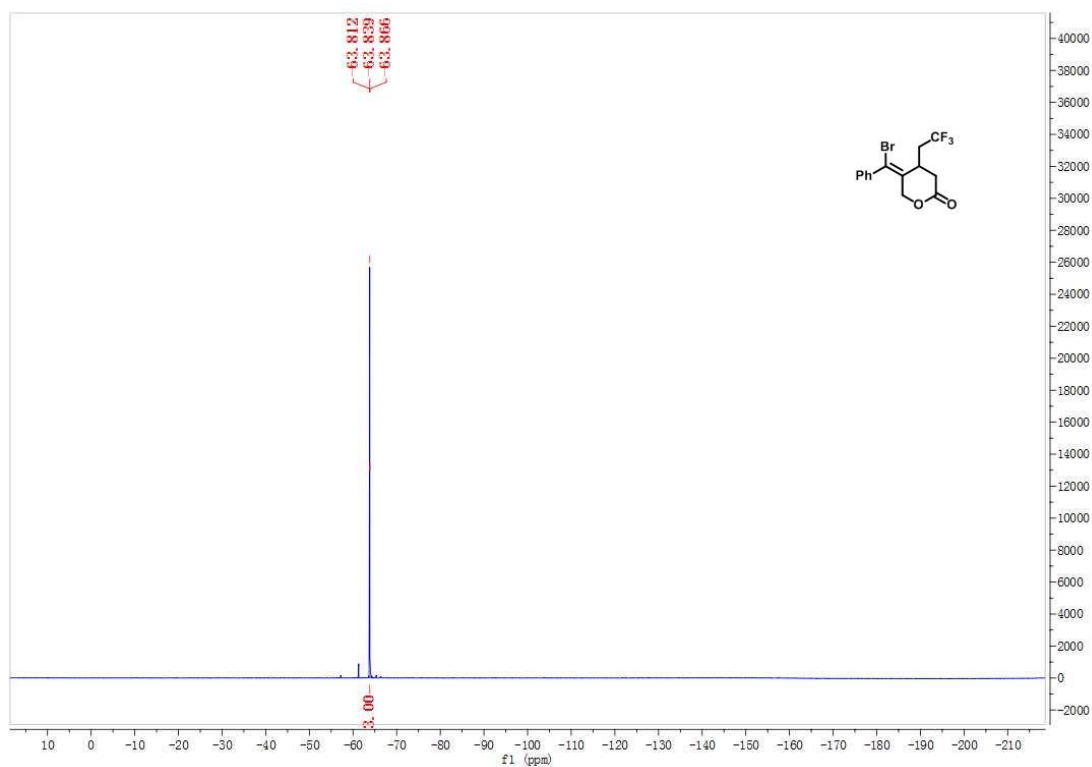

### 18. <sup>13</sup>C NMR

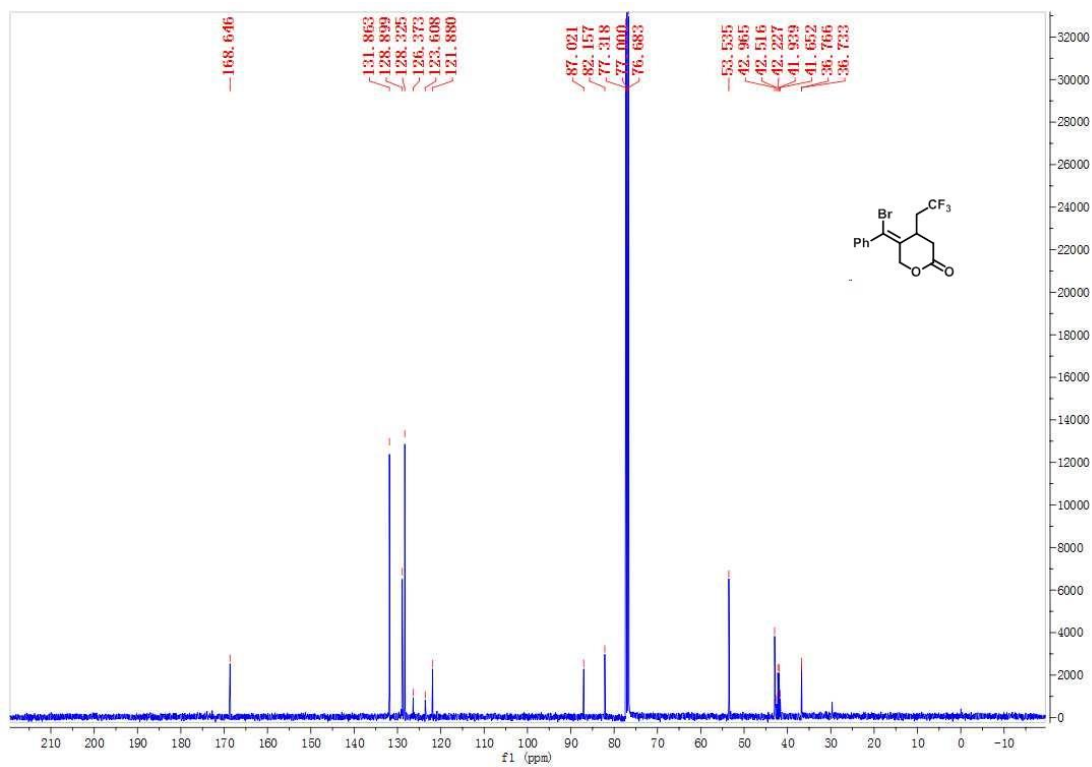

## 20. $^1\text{H}$ NMR

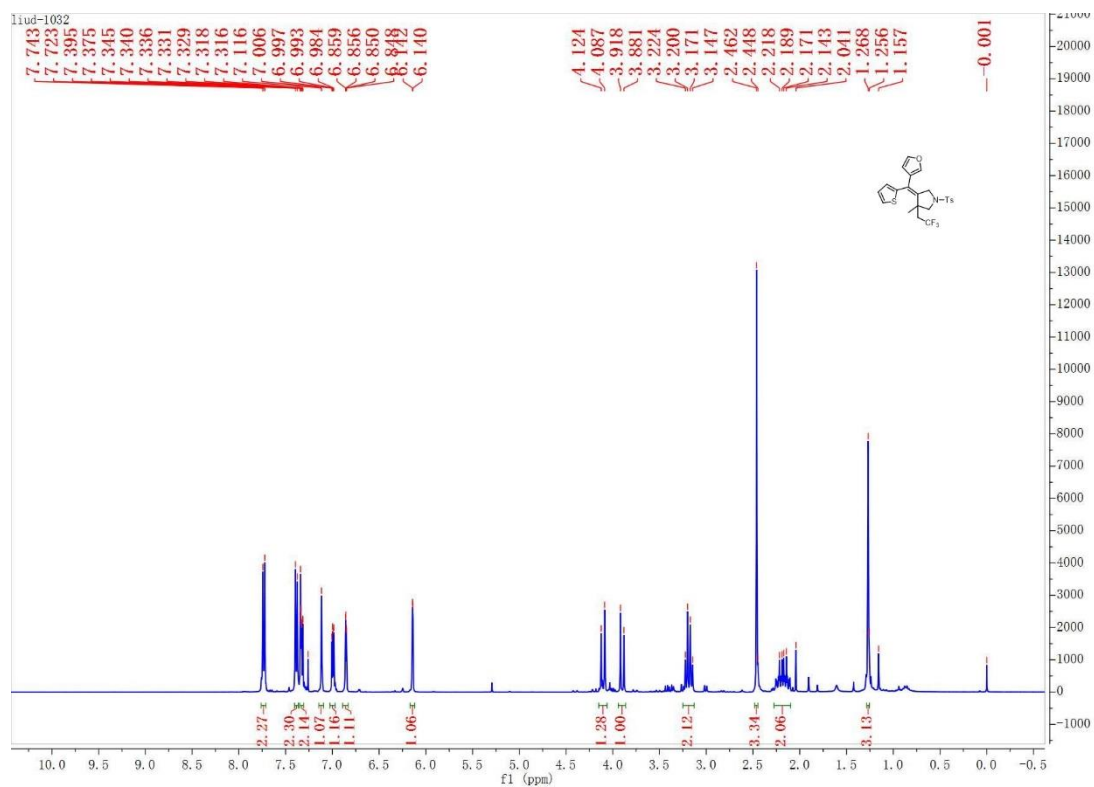

## 20. $^{19}\text{F}$ NMR

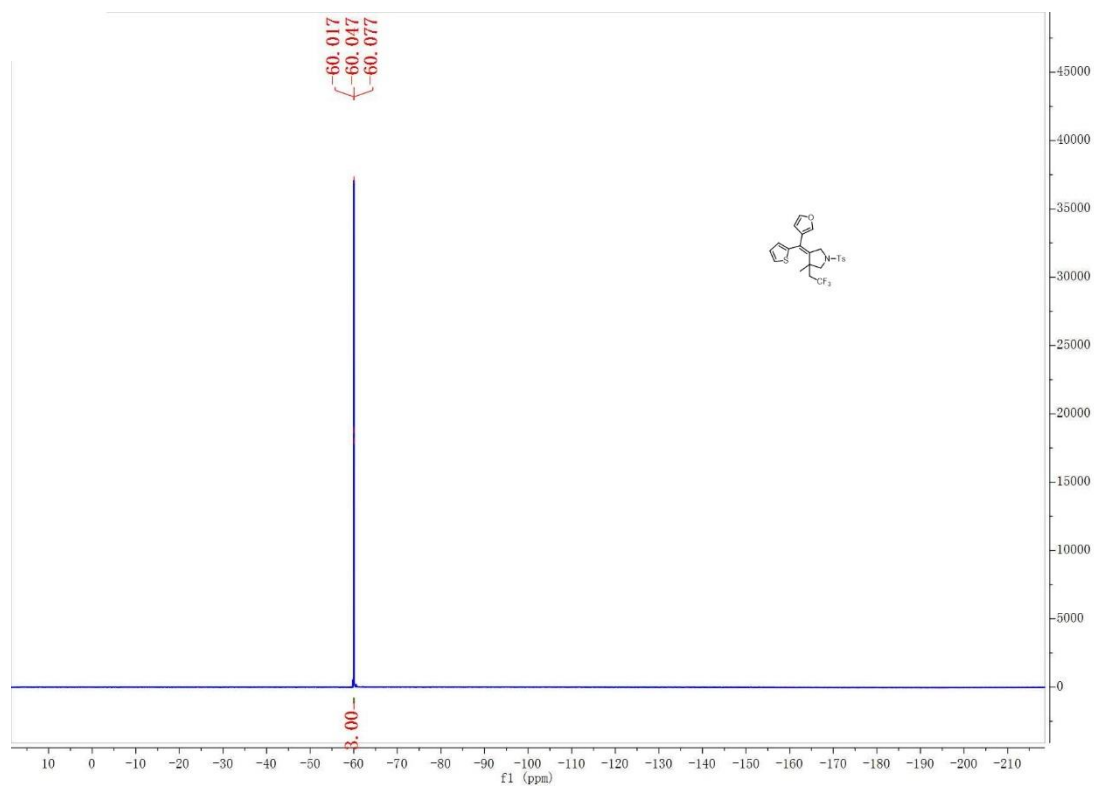

## 20. <sup>13</sup>C NMR

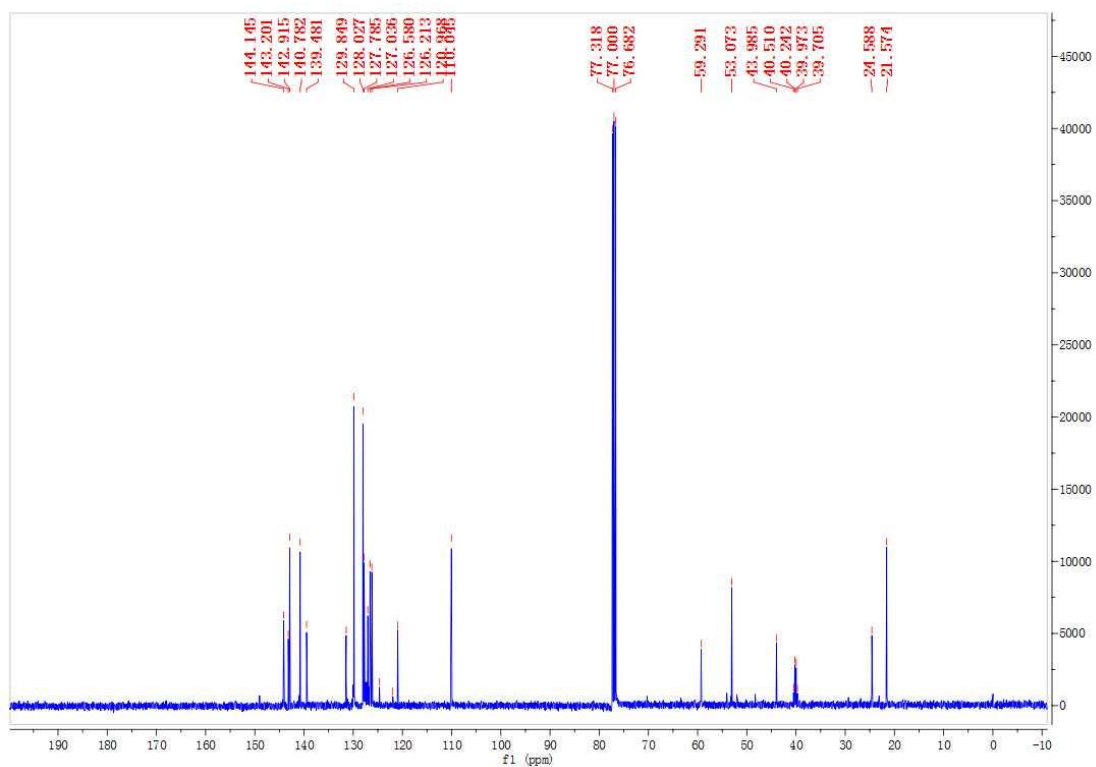

## 21. <sup>1</sup>H NMR

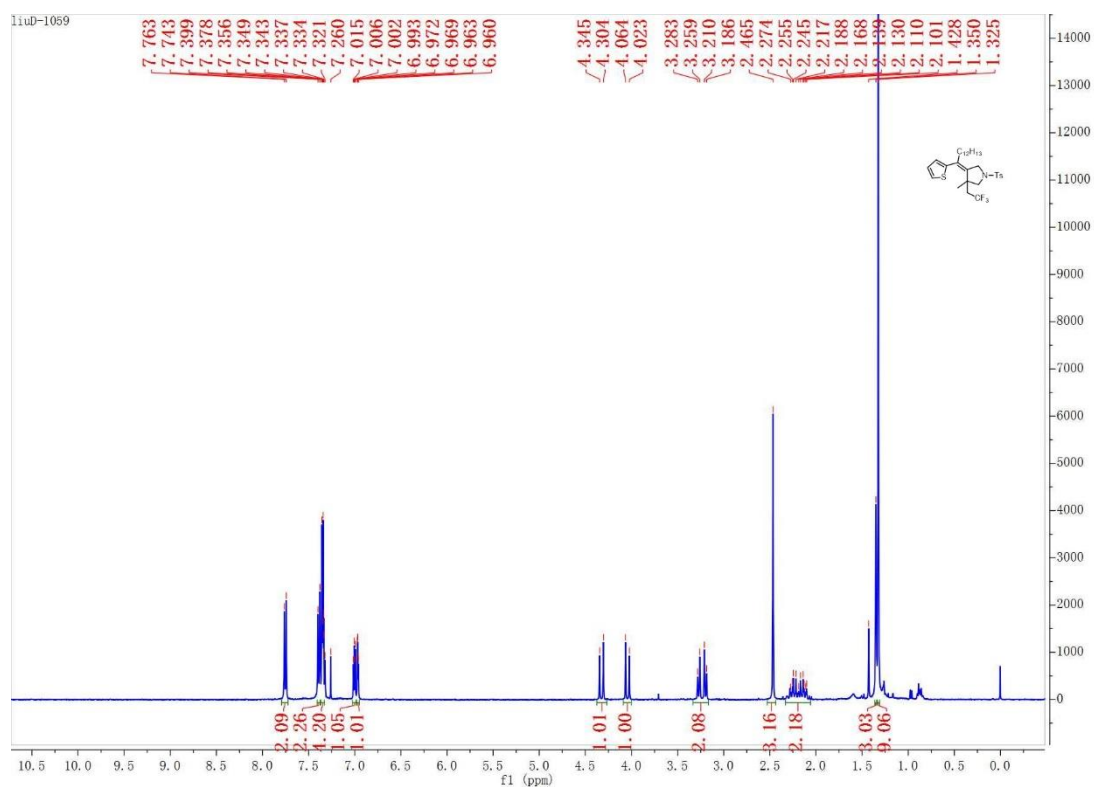

## 21. <sup>19</sup>F NMR

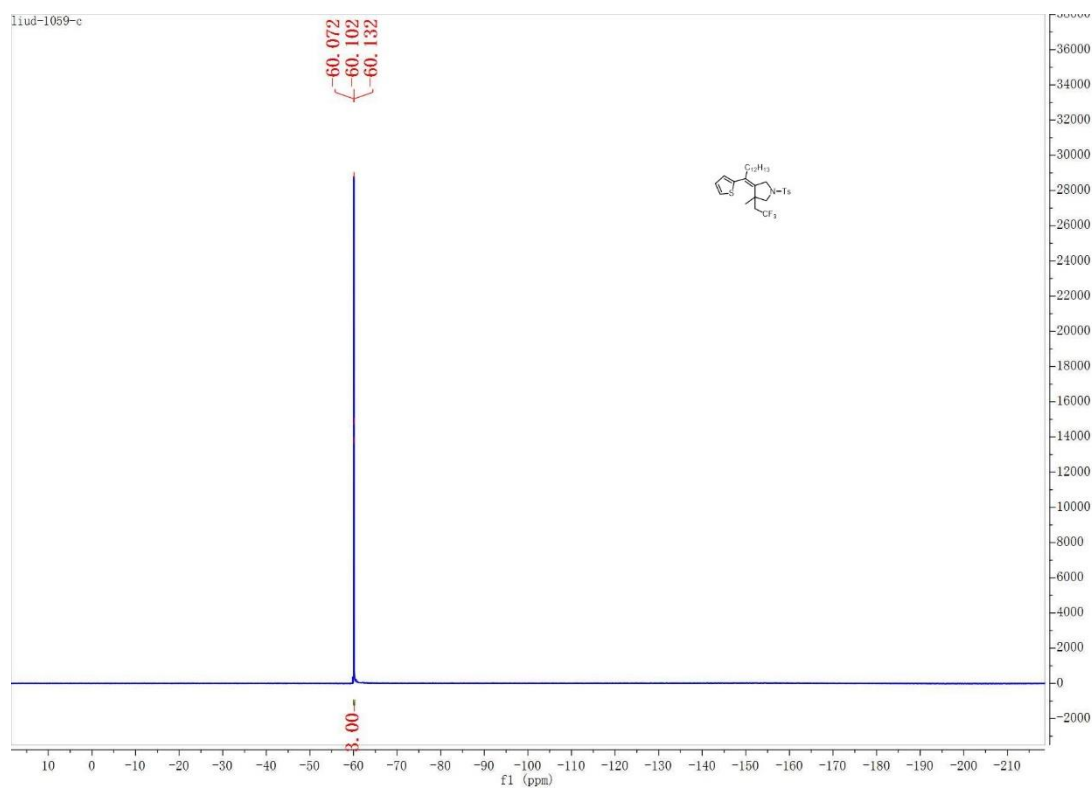

## 21. <sup>13</sup>C NMR

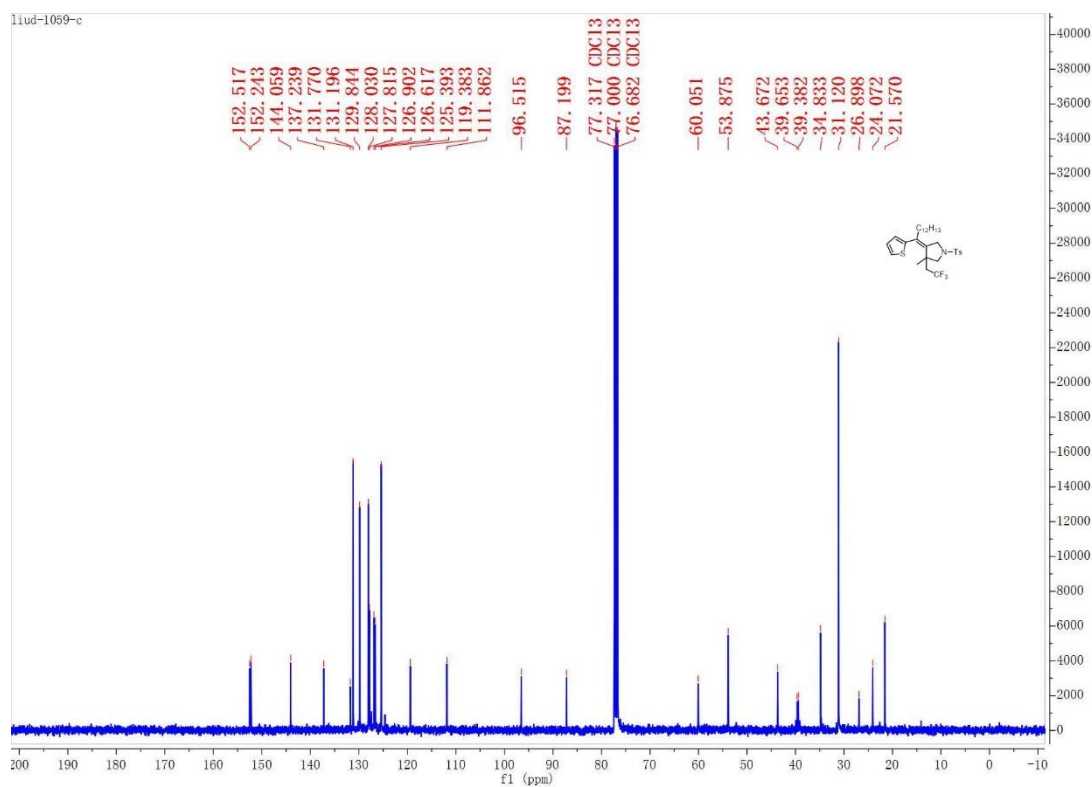

## 22. $^1\text{H}$ NMR

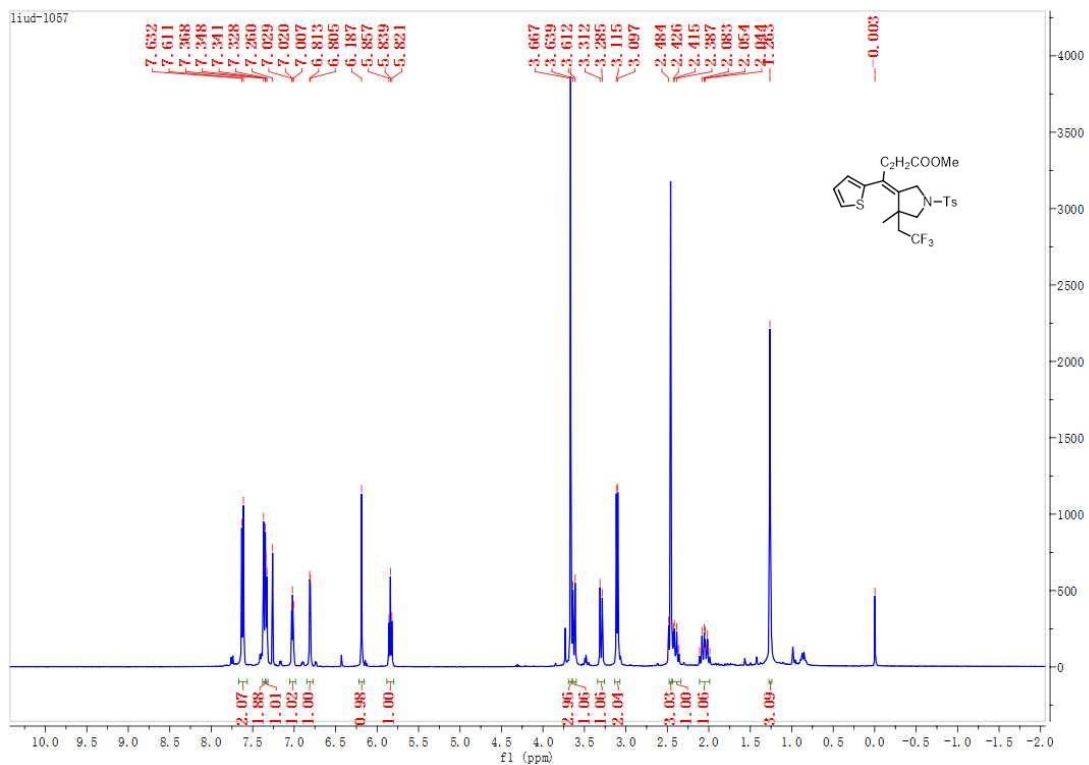

## 22. $^{19}\text{F}$ NMR

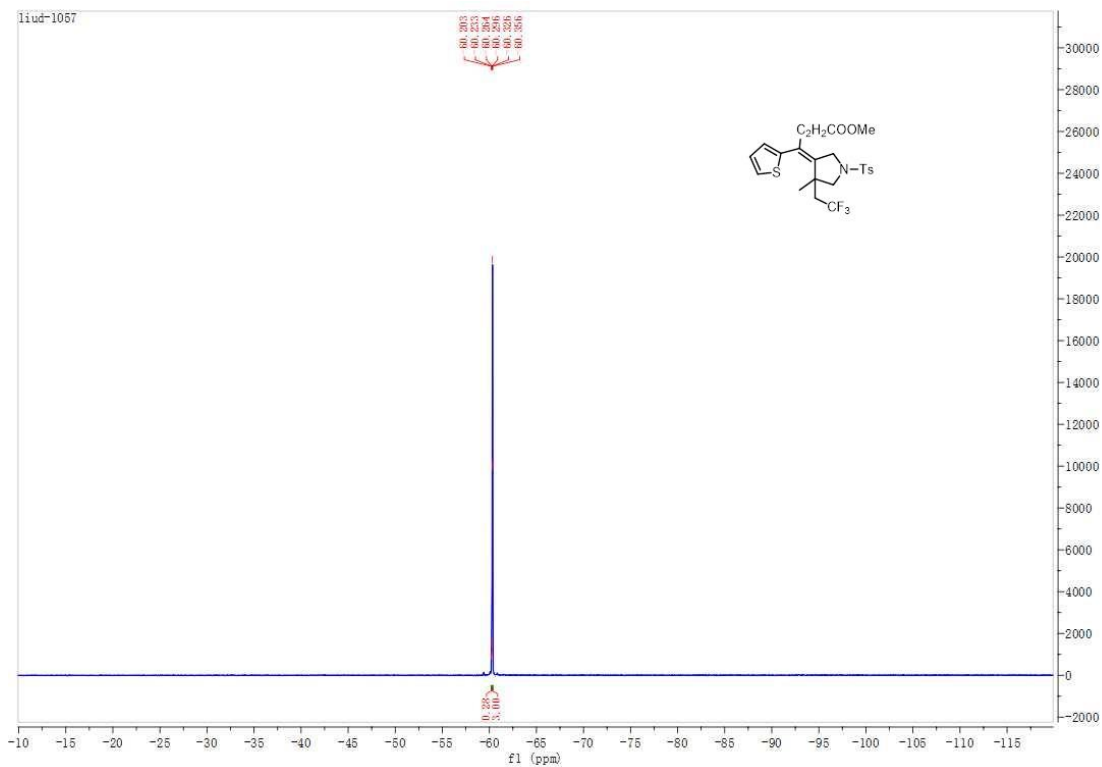

## 22. <sup>13</sup>C NMR

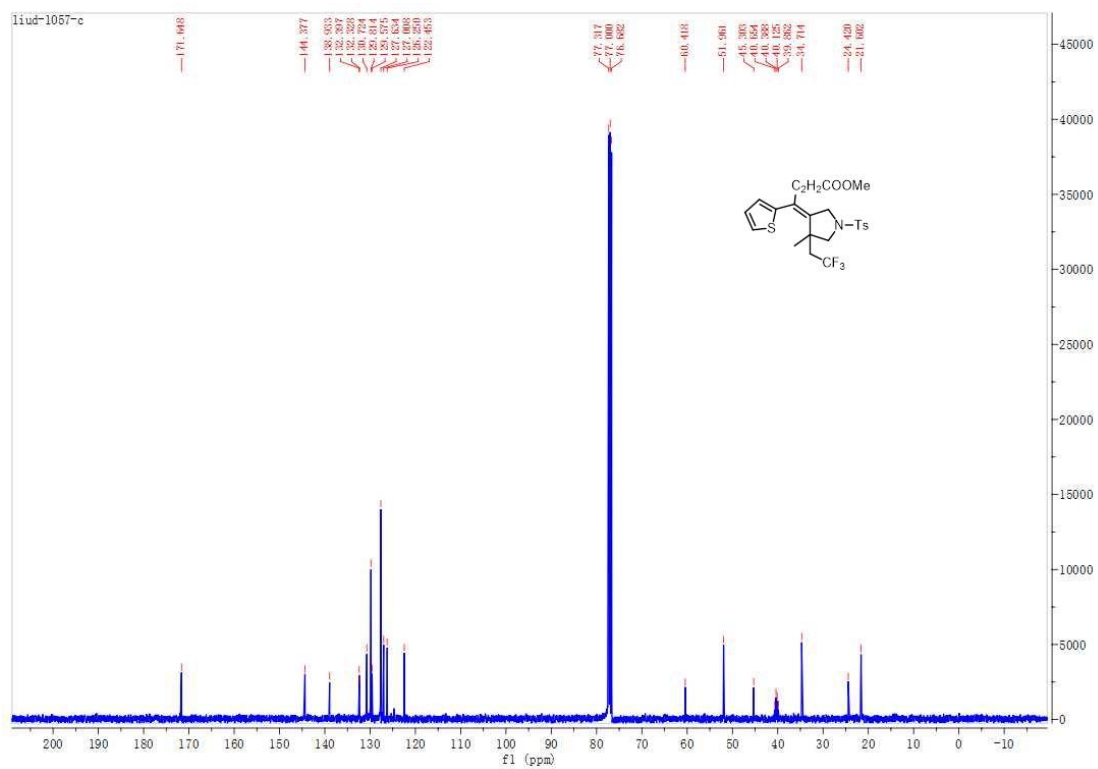

Supplement: c8qo00847g1.pdf [file c8qo00847g1.pdf]
